# Supplementary material for: Tandem dinucleophilic cyclization of cyclohexane-1,3-diones with pyridinium salts
Source: publisher site journal article supplement (doi:10.3762/bjoc.9.124), 2013-06-10
Supplement: Additional file 1 [file 1860-5397-9-124-S1.pdf]

# Supporting Information File 1

for

## Tandem dinucleophilic cyclization of cyclohexane-1,3-diones with pyridinium salts.

Mostafa Kiamehr<sup>1,2,3</sup>, Firouz Matloubi Moghaddam<sup>2\*</sup>, Satenik Mkrtchyan<sup>1</sup>, Volodymyr Semeniuchenko<sup>4</sup>, Linda Supe<sup>1</sup>, Alexander Villinger<sup>1</sup>, Peter Langer<sup>1,5\*</sup>, Viktor O. Iaroshenko<sup>1,4,§,\*</sup>

Address: <sup>1</sup>Institut für Chemie der Universität Rostock, Albert-Einstein-Straße 3a, D-18059 Rostock, Fax: (+49-381-498-6411), <sup>2</sup>Laboratory of Organic Synthesis and Natural Products, Department of Chemistry, Sharif University of Technology, P. O. Box 11155-9516 Tehran, Iran, <sup>3</sup>Department of Chemistry, Faculty of Science, University of Qom, Qom, Iran, <sup>4</sup>National Taras Shevchenko University, Volodymyrska st 62, Kyiv-33, 01033, Ukraine and <sup>5</sup>Leibniz Institut für Katalyse e.V. an der Universität Rostock, Albert-Einstein-Straße 29a, D-18059 Rostock.

Email: Firouz Matloubi Moghaddam\* - [Matloubi@sharif.edu](mailto:Matloubi@sharif.edu), Peter Langer\* – [peter.langer@uni-rostock.de](mailto:peter.langer@uni-rostock.de), Viktor O. Iaroshenko\* - [viktor.iaroshenko@uni-rostock.de](mailto:viktor.iaroshenko@uni-rostock.de)

§further email address [iva108@gmail.com](mailto:iva108@gmail.com)

Details on synthetic procedures, list of pyridinium salts, characterization of new compounds, copies of NMR spectra, X-ray structures of compounds **6d**, **7c** and **8**.

## Table of Contents

|                                                                                                                                              |     |
|----------------------------------------------------------------------------------------------------------------------------------------------|-----|
| General information.....                                                                                                                     | S3  |
| List of pyridinium salts used .....                                                                                                          | S4  |
| NMR, HRMS and IR spectral data .....                                                                                                         | S5  |
| Copies of $^1\text{H}$ and $^{13}\text{C}$ NMR spectra for compounds <b>3</b> , <b>4</b> , <b>5</b> , <b>6</b> , <b>7</b> and <b>8</b> ..... | S16 |
| X-ray structures of compounds <b>6d</b> , <b>7c</b> , <b>8</b> . ....                                                                        | S80 |

## General information

Chemical shifts of the  $^1\text{H}$  and  $^{13}\text{C}$  NMR are reported in parts per million using the solvent internal standard ( $\text{CDCl}_3$  7.26 ppm and 77.0 ppm,  $\text{DMSO}-d_6$  2.49 ppm and 39.7 ppm). Infrared spectra were recorded in an ATR apparatus. Mass spectrometric data (MS) were obtained by electron ionization (EI, 70 eV), chemical ionization (CI, isobutane) or electrospray ionization (ESI). Melting points are uncorrected. The solvents were purchased directly from ACROS and used without further purification. Analytical thin-layer chromatography was performed on 0.20 mm 60 A silica gel plates. Column chromatography was performed using 60 A silica gel (60–200 mesh).

## General procedure for the synthesis of pyridinium salts.

Alkyl bromide or iodide (0.2 mol) was added dropwise to the acetone solution (150–200 mL) of the corresponding pyridine derivative (0.1 mol). The mixture was stirred under argon for 2–3 days (progress of alkylation was controlled by TLC). After completion, the formed precipitate was filtered, washed with acetone and dried in vacuum at room temperature (heating caused decomposition). The obtained pyridinium salt was used without further purification or characterization.

## General Procedures for the synthesis of compounds 3–8.

### *Procedure (A):*

In a 25 mL Schlenk flask, under argon flow, 2.0 mmol of diketone, 1.0 mmol of the appropriate pyridinium salt, and 1.0 mmol (138 mg) of  $\text{K}_2\text{CO}_3$  were loaded. The flask was covered with a septum stopper and 7 mL of absolute  $\text{CH}_3\text{CN}$  was added by syringe. The reaction mixture was left under intensive stirring at room temperature for 24 hours. Then the solvent was removed under reduced pressure and the crude material was subjected to column chromatography.

### *Procedure (B):*

In the case of the 3-cyanopyridinium salt  $\text{NaHCO}_3$  (2.0 mmol, 168 mg) was used as a base and the reaction mixture was left over 4 days.

### *Procedure (C):*

In the case of 2-cyanopyridinium salts the reaction was completed within 1 hour.

## List of pyridinium salts used

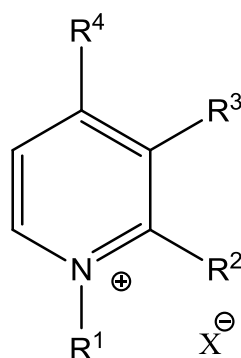

**Figure S1**

**Table 1**

| Entry | <b>2</b>  | $R^1$     | $R^2$ | $R^3$              | $R^4$ | $X^-$ | Known | Reactivity |
|-------|-----------|-----------|-------|--------------------|-------|-------|-------|------------|
| 1     | <b>2a</b> | Me        | H     | COMe               | H     | I     | Yes   | Yes        |
| 2     | <b>2b</b> | Me        | H     | COPh               | H     | I     | Yes   | Yes        |
| 3     | <b>2c</b> | Me        | H     | CO <sub>2</sub> Et | H     | I     | Yes   | Yes        |
| 4     | <b>2d</b> | Me        | H     | CN                 | H     | I     | Yes   | Yes        |
| 5     | <b>2e</b> | Et        | H     | COMe               | H     | Br    | Yes   | Yes        |
| 6     | <b>2f</b> | Et        | H     | COPh               | H     | Br    | No    | Yes        |
| 7     | <b>2g</b> | Allyl     | H     | COMe               | H     | Br    | No    | Yes        |
| 8     | <b>2h</b> | Allyl     | H     | COPh               | H     | Br    | Yes   | Yes        |
| 9     | <b>2i</b> | Allyl     | H     | CN                 | H     | Br    | No    | Yes        |
| 10    | <b>2j</b> | Bn        | H     | COMe               | H     | Br    | Yes   | Yes        |
| 11    | <b>2k</b> | Bn        | H     | COPh               | H     | Br    | No    | Yes        |
| 12    | <b>2l</b> | Bn        | H     | CN                 | H     | Br    | Yes   | Yes        |
| 13    | <b>2m</b> | Me        | CN    | H                  | H     | I     | Yes   | Yes        |
| 14    | <b>2n</b> | Allyl     | CN    | H                  | H     | Br    | No    | Yes        |
| 15    | <b>2o</b> | Bn        | CN    | H                  | H     | Br    | Yes   | Yes        |
| 16    | <b>2p</b> | Me        | H     | H                  | H     | I     | Yes   | No         |
| 17    | <b>2q</b> | Me        | COMe  | H                  | H     | I     | Yes   | No         |
| 18    | <b>2r</b> | Me        | Me    | H                  | H     | I     | Yes   | No         |
| 19    | <b>2s</b> | Me        | H     | CHO                | H     | I     | Yes   | No         |
| 20    | <b>2t</b> | Me        | H     | NO <sub>2</sub>    | H     | I     | Yes   | No         |
| 21    | <b>2u</b> | Me        | H     | Me                 | H     | I     | Yes   | No         |
| 22    | <b>2v</b> | Me        | H     | H                  | CN    | I     | Yes   | No         |
| 23    | <b>2w</b> | Me        | H     | H                  | COMe  | I     | Yes   | No         |
| 24    | <b>2x</b> | Propargyl | CN    | H                  | H     | Br    | No    | No         |
| 25    | <b>2y</b> | Propargyl | H     | CN                 | H     | Br    | No    | No         |



## NMR, HRMS and IR spectral data

### ***12-Acetyl-5,5,10-trimethyl-8-oxa-10-aza-tricyclo[7.3.1.0<sup>2,7</sup>]trideca-2(7),11-dien-3-one (3a)***

Following General Procedure (A); yellow solid, mp 120–122 °C, yield 85% (233 mg).

<sup>1</sup>H NMR (300 MHz, CDCl<sub>3</sub>) δ = 0.98 (s, 3H, Me), 0.99 (s, 3H, Me), 1.67 (dt, 1H, <sup>2</sup>J = 13.1 Hz, <sup>3</sup>J = 2.5 Hz, CHCH<sub>2</sub>CH), 1.85 (dt, 1H, <sup>2</sup>J = 13.4 Hz, <sup>3</sup>J = 2.6 Hz, CHCH<sub>2</sub>CH), 2.14 (s, 3H, COMe), 2.19 (d, 2H, <sup>2</sup>J = 3.4 Hz, CCH<sub>2</sub>), 2.25 (d, 2H, <sup>2</sup>J = 8.0 Hz, CCH<sub>2</sub>), 3.24 (s, 3H, NMe), 4.45–4.46 (m, 1H, COCCH), 5.61 (s, 1H, NCHO), 7.35 (s, 1H, MeNCHC). <sup>13</sup>C NMR (62.9 MHz, CDCl<sub>3</sub>): δ = 24.3 (CH), 25.6 (CH<sub>2</sub>), 27.3, 29.1 (CH<sub>3</sub>), 32.2 (C), 41.9 (CH<sub>2</sub>), 42.7, 44.6 (CH<sub>3</sub>), 50.4 (CH<sub>2</sub>), 65.7 (CH), 109.4, 111.3 (C), 149.0 (CH), 172.5, 192.0, 196.9 (C). MS (GC, 70 eV): *m/z* (%) = 275 (M<sup>+</sup>, 55), 260 (100), 232 (20), 139 (94). HRMS (EI): calcd for C<sub>16</sub>H<sub>21</sub>NO<sub>3</sub> (M<sup>+</sup>) 275.15160, found 275.151294. IR (ATR, cm<sup>-1</sup>):  $\tilde{\nu}$  = 2958 (w), 1637 (m), 1592 (s), 1567 (s), 1415 (w), 1380 (s), 1351 (m), 1325 (s), 1305 (s), 1210 (m), 1169 (s), 1121 (s), 1058 (m), 1035 (s), 1008 (m), 964 (m), 935 (m), 919 (m), 840 (s), 801 (m), 770 (w), 712 (m), 684 (w), 613 (s), 593 (m).

### ***12-Benzoyl-5,5,10-trimethyl-8-oxa-10-aza-tricyclo[7.3.1.0<sup>2,7</sup>]trideca-2(7),11-dien-3-one (3b)***

Following General Procedure (A); light orange solid, mp 117–118 °C, yield 72% (243 mg).

<sup>1</sup>H NMR (300 MHz, CDCl<sub>3</sub>) δ = 1.02 (s, 6H, 2 x Me), 1.81 (m, 2H, CHCH<sub>2</sub>CH), 2.22 (d, 2H, <sup>2</sup>J = 3.3 Hz, CCH<sub>2</sub>), 2.34 (d, 2H, <sup>2</sup>J = 5.2 Hz, CCH<sub>2</sub>), 3.19 (s, 3H, NMe), 4.50 (s, 1H, COCCH), 5.83 (q, 1H, <sup>3</sup>J = 2.5 Hz, NCHO), 7.15 (s, 1H, MeNCHC), 7.35–7.46 (m, 5H, CH<sub>Ar</sub>). <sup>13</sup>C NMR (75.5 MHz, CDCl<sub>3</sub>): δ = 25.5 (CH<sub>2</sub>), 27.7, 28.7 (CH<sub>3</sub>), 32.4 (C), 42.0 (CH<sub>2</sub>), 42.9, 44.9 (CH), 50.4 (CH<sub>2</sub>), 65.8 (CH<sub>3</sub>), 108.7, 111.2 (C), 128.0, 128.1, 129.8 (CH, Ar), 140.5 (C), 152.3 (CH), 172.8, 191.6, 196.8 (C). MS (GC, 70 eV): *m/z* (%) = 337 (M<sup>+</sup>, 45), 322 (59), 198 (100), 105 (28), 83 (24). HRMS (ESI): calcd for C<sub>21</sub>H<sub>24</sub>NO<sub>3</sub> (M + H) 338.17507, found 338.17489. IR (ATR, cm<sup>-1</sup>):  $\tilde{\nu}$  = 2952 (w), 1631 (m), 1615 (m), 1588 (s), 1563 (s), 1444 (w), 1379 (s), 1326 (s), 1307 (s), 1229 (w), 1212 (s), 1197 (m), 1128 (s), 1047 (s), 1026 (s), 979 (m), 964 (m), 896 (m), 842 (m), 829 (m), 801 (m), 782 (m), 766 (m), 742 (s), 699 (s), 670 (s), 644 (s), 611 (s), 573 (m).

### ***5,5,10-Trimethyl-3-oxo-8-oxa-10-aza-tricyclo[7.3.1.0<sup>2,7</sup>]trideca-2(7),11-diene-12-carboxylic acid ethyl ester (3c)***

Following General Procedure (A); light orange solid, mp 107–109 °C, yield 90% (275 mg).

<sup>1</sup>H NMR (300 MHz, CDCl<sub>3</sub>) δ = 0.97 (s, 3H, CH<sub>3</sub>), 0.99 (s, 3H, CH<sub>3</sub>), 1.24 (t, 3H, <sup>3</sup>J = 7.0 Hz, OCH<sub>2</sub>CH<sub>3</sub>), 1.64–1.84 (m, 2H, CHCH<sub>2</sub>CH), 2.10–2.34 (m, 4H, CCH<sub>2</sub>), 3.17 (s, 3H, NMe), 4.14 (m, 2H, OCH<sub>2</sub>CH<sub>3</sub>), 4.41–4.42 (m, 1H, CCHC), 5.46 (q, 1H, <sup>3</sup>J = 2.8 Hz, NCHO), 7.41 (s, 1H, MeNCHC). <sup>13</sup>C NMR (62.9 MHz, CDCl<sub>3</sub>): δ = 14.6 (CH<sub>3</sub>), 25.6 (CH<sub>2</sub>), 27.2, 29.1, (CH<sub>3</sub>), 32.2 (C), 41.9 (CH<sub>2</sub>), 42.3, 44.3 (CH), 50.4, 59.2 (CH<sub>2</sub>), 67.0 (NCH<sub>3</sub>), 96.2, 111.3 (C), 148.1 (CH), 167.1, 172.3 (C). MS (GC, 70 eV): *m/z* (%) = 305 (M<sup>+</sup>, 51), 290 (100), 276 (22), 262 (16), 232 (12), 166 (96), 138 (27). HRMS (ESI): calcd for C<sub>17</sub>H<sub>24</sub>NO<sub>4</sub> (M + H) 306.16998, found 306.16976.

IR (ATR,  $\text{cm}^{-1}$ ):  $\tilde{\nu}$  = 2961 (w), 1668 (m), 1603 (s), 1495 (w), 1445 (w), 1376 (s), 1326 (m), 1291 (s), 1272 (s), 1211 (m), 1165 (s), 1130 (m), 1099 (m), 1069 (s), 1028 (s), 978 (m), 944 (m), 908 (m), 835 (m), 802 (m), 771 (m), 698 (m), 657 (m), 609 (m).

***5,5,10-Trimethyl-3-oxo-8-oxa-10-aza-tricyclo[7.3.1.0<sup>2,7</sup>]trideca-2(7),11-diene-12-carbonitrile (3d)***

Following General Procedure (A); yellow solid, mp 139–141 °C, yield 63% (163 mg).

$^1\text{H}$  NMR (300 MHz,  $\text{CDCl}_3$ )  $\delta$  = 1.01 (s, 6H, 2 x Me), 1.71–1.87 (m, 2H,  $\text{CHCH}_2\text{CH}$ ), 2.22 (dd, 4H,  $^2J$  = 10.0 Hz,  $^4J$  = 1.8 Hz,  $\text{CCH}_2$ ), 3.08 (s, 3H, NMe), 3.68–3.69 (m, 1H,  $\text{CNCCCH}$ ), 5.21 (q, 1H,  $^3J$  = 2.3 Hz,  $\text{NCHO}$ ), 6.67 (s, 1H,  $\text{MeNCHC}$ ).  $^{13}\text{C}$  NMR (62.9 MHz,  $\text{CDCl}_3$ ):  $\delta$  = 20.4 (CH), 25.2 ( $\text{CH}_2$ ), 27.7, 28.8 ( $\text{CH}_3$ ), 32.1 (C), 40.4, 41.5 ( $\text{CH}_2$ ), 50.1 ( $\text{CH}_3$ ), 81.8 (CH), 84.2, 115.6, 119.9 (C), 145.1 (CH), 167.1, 195.2 (C). MS (GC, 70 eV):  $m/z$  (%) = 258 ( $\text{M}^+$ , 79), 241 (52), 174 (56), 159 (14), 146 (49), 119 (100). HRMS (ESI): calcd for  $\text{C}_{15}\text{H}_{19}\text{N}_2\text{O}_2$  ( $\text{M} + \text{H}$ ) 259.1441, found 259.14452. IR (ATR,  $\text{cm}^{-1}$ ):  $\tilde{\nu}$  = 2925 (w), 2184 (w), 1649 (m), 1618 (s), 1470 (w), 1440 (w), 1413 (w), 1387 (s), 1331 (s), 1231 (w), 1203 (m), 1114 (m), 1090 (m), 1035 (s), 979 (m), 904 (w), 866 (w), 826 (m), 792 (m), 769 (m), 721 (m), 649 (w), 622 (m), 577 (m).

***12-Acetyl-10-ethyl-5,5-dimethyl-8-oxa-10-aza-tricyclo[7.3.1.0<sup>2,7</sup>]trideca-2(7),11-dien-3-one (3e)***

Following General Procedure (A); yellow solid, mp 88–90 °C, yield 57% (165 mg).

$^1\text{H}$  NMR (300 MHz,  $\text{CDCl}_3$ )  $\delta$  = 0.98 (s, 6H, 2 x Me), 1.26 (t, 3H,  $^3J$  = 7.3 Hz,  $\text{NCH}_2\text{CH}_3$ ), 1.58–1.63 (m, 1H,  $\text{CHCH}_2\text{CH}$ ), 1.88 (dt, 1H,  $^2J$  = 13.3 Hz,  $^3J$  = 3.0 Hz,  $\text{CHCH}_2\text{CH}$ ), 2.16 (s, 3H, COMe), 2.17–2.27 (m, 4H,  $\text{CCH}_2$ ), 3.24–3.36 (m, 1H,  $\text{NCH}_2\text{CH}_3$ ), 3.72–3.83 (m, 1H,  $\text{NCH}_2\text{CH}_3$ ), 4.56–4.57 (m, 1H,  $\text{COCCH}$ ), 5.62 (s, 1H,  $\text{NCHO}$ ), 7.42 (s, 1H,  $\text{MeNCHC}$ ).  $^{13}\text{C}$  NMR (62.9 MHz,  $\text{CDCl}_3$ ):  $\delta$  = 15.2 ( $\text{CH}_3$ ), 24.4 (CH), 26.2 ( $\text{CH}_2$ ), 27.3, 29.1 ( $\text{CH}_3$ ), 32.2 (C), 42.0 ( $\text{CH}_2$ ), 42.8 ( $\text{CH}_3$ ), 49.9, 50.4 ( $\text{CH}_2$ ), 66.0 (CH), 109.4, 111.4 (C), 147.8 (CH), 172.4, 192.1, 196.9 (C). MS (GC, 70 eV):  $m/z$  (%) = 289 ( $\text{M}^+$ , 71), 260 (100), 246 (31), 204 (27), 150 (64). HRMS (EI): calcd for  $\text{C}_{17}\text{H}_{23}\text{NO}_3$  ( $\text{M}^+$ ) 289.16725, found 289.166641. IR (ATR,  $\text{cm}^{-1}$ ):  $\tilde{\nu}$  = 2961 (w), 2873 (w), 1642 (w), 1596 (s), 1574 (s), 1428 (w), 1380 (s), 1348 (s), 1302 (s), 1258 (s), 1222 (m), 1207 (m), 1163 (s), 1111 (m), 1033 (s), 981 (m), 946 (s), 931 (m), 917 (m), 836 (s), 800 (m), 766 (m), 710 (m), 681 (m), 611 (m), 591 (m), 562 (m).

***12-Benzoyl-10-ethyl-5,5-dimethyl-8-oxa-10-aza-tricyclo[7.3.1.0<sup>2,7</sup>]trideca-2(7),11-dien-3-one (3f)***

Following General Procedure (A); pale orange solid, mp 147–149 °C, yield 64% (225 mg).

$^1\text{H}$  NMR (300 MHz,  $\text{CDCl}_3$ )  $\delta$  = 1.02 (s, 6H, 2 x Me), 1.19 (t, 3H,  $^3J$  = 7.1 Hz,  $\text{NCH}_2\text{CH}_3$ ), 1.67 (dt, 1H,  $^2J$  = 13.3 Hz,  $^3J$  = 2.4 Hz,  $\text{CHCH}_2\text{CH}$ ), 1.95 (dt, 1H,  $^2J$  = 13.3 Hz,  $^3J$  = 2.6 Hz,  $\text{CHCH}_2\text{CH}$ ), 2.21 (d, 2H,  $^2J$  = 2.2 Hz,  $\text{CCH}_2$ ), 2.33 (d, 2H,  $^2J$  = 3.7 Hz,  $\text{CCH}_2$ ), 3.17–3.79 (m, 2H,  $\text{NCH}_2\text{CH}_3$ ), 4.61 (s, 1H,  $\text{COCCH}$ ), 5.84 (br. q, 1H,  $^3J$  = 2.0 Hz,  $\text{NCHO}$ ), 7.23 (s, 1H,  $\text{MeNCHC}$ ), 7.34–7.47 (m, 5H,  $\text{CH}_{\text{Ar}}$ ).  $^{13}\text{C}$  NMR (75.5 MHz,  $\text{CDCl}_3$ ):  $\delta$  = 15.1 ( $\text{CH}_3$ ), 26.2 ( $\text{CH}_2$ ), 27.7, 28.7 ( $\text{CH}_3$ ), 32.4 (C), 42.1 ( $\text{CH}_2$ ), 43.1 (CH), 50.0, 50.5 ( $\text{CH}_2$ ), 66.1 (CH), 108.7, 111.4 (C), 128.0, 128.1, 129.8 (CH, Ar), 140.6 (C), 151.0 (CH), 172.7, 191.6, 196.8 (C). MS

(GC, 70 eV):  $m/z$  (%) = 351 ( $M^+$ , 38), 322 (56), 246 (15), 212 (100), 184 (26), 105 (72). HRMS (ESI): calcd for  $C_{22}H_{26}NO_3$  ( $M + H$ ) 352.19072, found 352.19132. IR (ATR,  $cm^{-1}$ ):  $\tilde{\nu}$  = 2945 (w), 1639 (m), 1592 (s), 1565 (s), 1443 (w), 1402 (m), 1379 (s), 1363 (s), 1316 (m), 1286 (m), 1260 (s), 1229 (m), 1211 (m), 1191 (m), 1130 (s), 1035 (s), 980 (m), 946 (m), 897 (m), 834 (s), 800 (m), 765 (m), 746 (m), 705 (s), 669 (m), 647 (m), 615 (m), 566 (m).

***12-Acetyl-10-allyl-5,5-dimethyl-8-oxa-10-aza-tricyclo[7.3.1.0<sup>2,7</sup>]trideca-2(7),11-dien-3-one (3g)***

Following General Procedure (A); yellow solid, mp 106–108 °C, yield 65% (196 mg).

$^1H$  NMR (300 MHz,  $CDCl_3$ )  $\delta$  = 0.99 (s, 3H, Me), 1.00 (s, 3H, Me), 1.64 (dt, 1H,  $^2J$  = 13.3 Hz,  $^3J$  = 2.5 Hz,  $CHCH_2CH$ ), 1.88 (dt, 1H,  $^2J$  = 13.3 Hz,  $^3J$  = 2.8 Hz,  $CHCH_2CH$ ), 2.16 (s, 3H, COMe), 2.18–2.27 (m, 4H,  $CCH_2$ ), 3.82–3.89 (m, 1H,  $NCH_2CHCH_2$ ), 4.30–4.38 (m, 1H,  $NCH_2CHCH_2$ ), 4.53–4.54 (m, 1H,  $COCCH$ ), 5.25–5.37 (m, 2H,  $NCH_2CHCH_2$ ), 5.64 (s, 1H,  $NCHO$ ), 5.75–5.88 (m, 1H,  $NCH_2CHCH_2$ ), 7.40 (s, 1H,  $NCHCCO$ ).  $^{13}C$  NMR (75.5 MHz,  $CDCl_3$ ):  $\delta$  = 26.0 ( $CH_2$ ), 27.3 ( $CH_3$ ), 29.1 ( $CH$ ), 28.2 ( $CH_3$ ), 32.3 ( $C$ ), 41.9 ( $CH_2$ ), 43.0 ( $CH_3$ ), 50.4, 57.5 ( $CH_2$ ), 66.0 ( $CH$ ), 109.9, 111.5 ( $C$ ), 119.0 ( $CH_2$ ), 133.2, 148.2 ( $CH$ ), 172.5, 192.5, 196.9 ( $C$ ). MS (GC, 70 eV):  $m/z$  (%) = 301 ( $M^+$ , 81), 260 (73), 204 (29), 162 (69), 43 (100). HRMS (EI): calcd for  $C_{18}H_{23}NO_3$  ( $M^+$ ) 301.16725, found 301.166587. IR (ATR,  $cm^{-1}$ ):  $\tilde{\nu}$  = 2955 (w), 1644 (w), 1600 (s), 1571 (s), 1451 (w), 1421 (m), 1380 (s), 1353 (s), 1303 (m), 1238 (m), 1208 (s), 1160 (m), 1116 (s), 1033 (m), 956 (m), 937 (m), 915 (s), 837 (m), 774 (w), 715 (m), 609 (m).

***10-Allyl-12-benzoyl-5,5-dimethyl-8-oxa-10-aza-tricyclo[7.3.1.0<sup>2,7</sup>]trideca-2(7),11-dien-3-one (3h)***

Following General Procedure (A); pale orange solid, mp 106–108 °C, yield 62% (225 mg).

$^1H$  NMR (300 MHz,  $CDCl_3$ )  $\delta$  = 1.01 (s, 3H, Me), 1.02 (s, 3H, Me), 1.69 (dt, 1H,  $^2J$  = 13.6 Hz,  $^3J$  = 2.6 Hz,  $CHCH_2CH$ ), 1.94 (dt, 1H,  $^2J$  = 13.4 Hz,  $^3J$  = 2.9 Hz,  $CHCH_2CH$ ), 2.21 (d, 2H,  $^2J$  = 2.1 Hz,  $CCH_2$ ), 2.32 (d, 2H,  $^2J$  = 4.0 Hz,  $CCH_2$ ), 3.72–3.80 (m, 1H,  $NCH_2CHCH_2$ ), 4.27–4.35 (m, 1H,  $NCH_2CHCH_2$ ), 4.57 (q, 1H,  $^4J$  = 2.1 Hz,  $CCHCH_2$ ), 5.20–5.32 (m, 2H,  $NCH_2CHCH_2$ ), 5.67–5.81 (m, 1H,  $NCH_2CHCH_2$ ), 5.85 (q, 1H,  $^4J$  = 2.6 Hz,  $NCHO$ ), 7.21 (s, 1H,  $NCHC$ ), 7.34–7.46 (m, 5H, Ph).  $^{13}C$  NMR (75.5 MHz,  $CDCl_3$ ):  $\delta$  = 25.9 ( $CH_2$ ), 27.6, 28.7 ( $CH_3$ ), 32.3 ( $C$ ), 42.0 ( $CH_2$ ), 43.1 ( $CH$ ), 50.4, 57.6 ( $CH_2$ ), 66.0 ( $CH$ ), 108.9, 111.4 ( $C$ ), 119.0 ( $CH_2$ ), 128.0, 128.1, 130.0, 133.0 ( $CH$ ), 140.4 ( $C$ ), 151.4 ( $CH$ ), 172.7, 191.7, 196.8 ( $C$ ). MS (GC, 70 eV):  $m/z$  (%) = 363 ( $M^+$ , 63), 322 (36), 258 (45), 224 (51), 105 (100). HRMS (ESI): calcd for  $C_{23}H_{26}NO_3$  ( $M + H$ ) 364.19072, found 364.19069. IR (ATR,  $cm^{-1}$ ):  $\tilde{\nu}$  = 2959 (w), 1738 (w), 1640 (m), 1597 (s), 1566 (s), 1445 (w), 1416 (m), 1378 (s), 1349 (s), 1327 (m), 1220 (s), 1180 (m), 1134 (m), 1104 (s), 1034 (s), 992 (m), 949 (m), 935 (m), 888 (m), 842 (m), 807 (w), 783 (m), 741 (m), 699 (s), 646 (s), 622 (m).

***10-Allyl-5,5-dimethyl-3-oxo-8-oxa-10-aza-tricyclo[7.3.1.0<sup>2,7</sup>]trideca-2(7),11-diene-12-carbonitrile (3i)***

Following General Procedure (B); yellow solid, mp 125–127 °C, yield 72% (204 mg).

<sup>1</sup>H NMR (250 MHz, CDCl<sub>3</sub>) δ = 1.01 (s, 3H, Me), 1.02 (s, 3H, Me), 1.70-1.91 (m, 2H, CHCH<sub>2</sub>CH), 2.21 (s, 2H, CCH<sub>2</sub>), 2.22 (s, 2H, CCH<sub>2</sub>), 3.70-3.71 (m, 1H, CCHCH<sub>2</sub>), 3.77-3.98 (m, 2H, NCH<sub>2</sub>CHCH<sub>2</sub>), 5.15-5.32 (m, 3H, NCH<sub>2</sub>CHCH<sub>2</sub>, NCHO), 5.70-5.86 (m, 1H, NCH<sub>2</sub>CHCH<sub>2</sub>), 6.72 (s, 1H, NCHCCN). <sup>13</sup>C NMR (62.9 MHz, CDCl<sub>3</sub>): δ = 20.7 (CH), 25.4 (CH<sub>2</sub>), 27.8, 28.8 (CH<sub>3</sub>), 32.1 (C), 41.6, 50.1, 55.9 (CH<sub>2</sub>), 80.6 (CH), 84.7, 115.5, 118.7 (CH<sub>2</sub>), 119.9 (C), 133.0, 144.3 (CH), 167.2, 195.4 (C). MS (GC, 70 eV): *m/z* (%) = 284 (M<sup>+</sup>, 54), 267 (27), 243 (100), 200 (27), 172 (24), 145 (54), 104 (15), 83 (31). HRMS (ESI): calcd for C<sub>17</sub>H<sub>21</sub>N<sub>2</sub>O<sub>2</sub> (M + H) 285.15975, found 285.16023. IR (ATR, cm<sup>-1</sup>):  $\tilde{\nu}$  = 2956 (w), 2925 (w), 2193 (m), 1623 (s), 1449 (w), 1383 (s), 1285 (w), 1235 (m), 1208 (m), 1106 (m), 1044 (s), 1033 (s), 994 (w), 948 (m), 922 (m), 837 (m), 794 (w), 728 (w), 668 (w), 604 (w).

**12-Acetyl-10-benzyl-5,5-dimethyl-8-oxa-10-aza-tricyclo[7.3.1.0<sup>2,7</sup>]trideca-2(7),11-dien-3-one (3j)**

Following General Procedure (A); orange solid, mp 156–158 °C, yield 73% (324 mg).

<sup>1</sup>H NMR (300 MHz, CDCl<sub>3</sub>) δ = 0.98 (s, 3H, Me), 1.01 (s, 3H, Me), 1.50 (dt, 1H, <sup>2</sup>*J* = 13.5 Hz, <sup>3</sup>*J* = 2.5 Hz, CHCH<sub>2</sub>CH), 1.78 (dt, 1H, <sup>2</sup>*J* = 13.3 Hz, <sup>3</sup>*J* = 3.0 Hz, CHCH<sub>2</sub>CH), 2.17 (s, 3H, CH<sub>3</sub>), 2.19-2.28 (m, 4H, CCH<sub>2</sub>), 4.39 (d, 1H, <sup>2</sup>*J* = 14.8 Hz, PhCH<sub>2</sub>), 4.48 (s, 1H, OCCCH), 4.90 (d, 1H, <sup>2</sup>*J* = 14.8 Hz, PhCH<sub>2</sub>), 5.62 (s, 1H, NCHO), 7.28-7.37 (m, 5H, CH<sub>Ar</sub>), 7.54 (s, 1H, NCHC). <sup>13</sup>C NMR (62.9 MHz, CDCl<sub>3</sub>): δ = 24.4 (CH<sub>3</sub>), 26.0 (CH<sub>2</sub>), 27.2, 29.2 (CH<sub>3</sub>), 32.3 (C), 42.0 (CH<sub>2</sub>), 42.5 (CH), 50.4, 58.9 (CH<sub>2</sub>), 66.0 (CH), 109.7, 111.4 (C), 128.0, 128.1, 128.9 (Ar), 136.6 (C), 148.4 (CH), 172.6, 192.4, 197.1 (C). MS (GC, 70 eV): *m/z* (%) = 351 (M<sup>+</sup>, 41), 308 (20), 260 (96), 204 (14), 106 (18), 91 (100). HRMS (EI): calcd for C<sub>22</sub>H<sub>25</sub>NO<sub>3</sub> (M<sup>+</sup>) 351.18290, found 351.183121. IR (ATR, cm<sup>-1</sup>):  $\tilde{\nu}$  = 2957 (w), 1642 (w), 1597 (s), 1573 (s), 1431 (w), 1382 (s), 1351 (s), 1300 (m), 1207 (s), 1154 (m), 1115 (s), 1046 (s), 1033 (s), 981 (w), 936 (m), 918 (m), 838 (m), 799 (w), 750 (w), 699 (m), 603 (m).

**12-Benzoyl-10-benzyl-5,5-dimethyl-8-oxa-10-aza-tricyclo[7.3.1.0<sup>2,7</sup>]trideca-2(7),11-dien-3-one (3k)**

Following General Procedure (A); orange solid, mp 156–158 °C, yield 73% (324 mg).

<sup>1</sup>H NMR (250 MHz, CDCl<sub>3</sub>) δ = 1.02 (s, 3H, Me), 1.05 (s, 3H, Me), 1.55 (dt, 1H, <sup>2</sup>*J* = 13.5 Hz, <sup>3</sup>*J* = 2.4 Hz, CHCH<sub>2</sub>CH), 1.85 (dt, 1H, <sup>2</sup>*J* = 13.5 Hz, <sup>3</sup>*J* = 2.3 Hz, CHCH<sub>2</sub>CH), 2.25 (d, 2H, <sup>2</sup>*J* = 5.3 Hz, CCH<sub>2</sub>), 2.34 (d, 2H, <sup>2</sup>*J* = 6.8 Hz, CCH<sub>2</sub>), 4.32 (d, 1H, <sup>2</sup>*J* = 14.5 Hz, NCH<sub>2</sub>), 4.52-4.53 (m, 1H, OCCCH), 4.87 (d, 1H, <sup>2</sup>*J* = 14.5 Hz, NCH<sub>2</sub>), 5.84 (q, 1H, <sup>3</sup>*J* = 2.4 Hz, NCHO), 7.26-7.47 (m, 11H, NCHC, CH<sub>Ar</sub>). <sup>13</sup>C NMR (62.9 MHz, CDCl<sub>3</sub>): δ = 25.9 (CH<sub>2</sub>), 27.6, 28.8 (CH<sub>3</sub>), 32.4 (C), 42.0 (CH<sub>2</sub>), 42.7 (CH), 50.4, 59.0 (CH<sub>2</sub>), 66.0 (CH), 108.8, 111.3 (C), 128.0, 128.0, 128.1, 128.3, 129.9 (CH, Ar), 136.3, 140.4 (C), 151.7 (CH), 172.9, 191.8, 197.0 (C). MS (GC, 70 eV): *m/z* (%) = 413 (M<sup>+</sup>, 53), 322 (75), 308 (22), 275 (16), 183 (31), 105 (79), 91 (100). HRMS (ESI): calcd for C<sub>27</sub>H<sub>28</sub>NO<sub>3</sub> (M + H) 414.20637, found 414.20648. IR (ATR, cm<sup>-1</sup>):  $\tilde{\nu}$  = 2928 (w), 1644 (w), 1598 (s), 1557 (s), 1443 (w), 1378 (s), 1303 (m), 1210 (s), 1107 (m), 1047 (m), 1021 (m), 956 (w), 890 (w), 831 (w), 791 (w), 727 (m), 697 (s), 617 (m).

**10-Benzyl-5,5-dimethyl-3-oxo-8-oxa-10-aza-tricyclo[7.3.1.0<sup>2,7</sup>]trideca-2(7),11-diene-12-carbonitrile (3l)**

Following General Procedure (B); light pink solid, mp 139–141 °C, yield 70% (234 mg).

<sup>1</sup>H NMR (250 MHz, CDCl<sub>3</sub>) δ = 0.98–1.00 (m, 6H, 2 x Me), 1.71–1.88 (m, 2H, CHCH<sub>2</sub>CH), 2.05–2.19 (m, 4H, 2 x CCH<sub>2</sub>), 3.71 (s, 1H, CNCCCH), 4.35–4.55 (m, 2H, NCH<sub>2</sub>), 5.31 (s, 1H, NCHO), 6.83 (s, 1H NCHCCN), 7.19–7.33 (m, 5H, CH<sub>Ar</sub>). <sup>13</sup>C NMR (62.9 MHz, CDCl<sub>3</sub>): δ = 20.7 (CH), 25.4 (CH<sub>2</sub>), 27.9, 28.6 (CH<sub>3</sub>), 32.0 (C), 41.4, 50.0, 57.3 (CH<sub>2</sub>), 80.6 (CH), 84.8, 115.4, 119.9 (C), 127.6, 128.2, 128.9 (CH, Ar), 136.3 (C), 144.7 (CH), 167.2, 195.4 (C). MS (GC, 70 eV): *m/z* (%) = 334 (M<sup>+</sup>, 31), 243 (100), 222 (12), 91 (96). HRMS (ESI): calcd for C<sub>21</sub>H<sub>23</sub>N<sub>2</sub>O<sub>2</sub> (M + H) 335.1754, found 335.17541. IR (ATR, cm<sup>-1</sup>):  $\tilde{\nu}$  = 2956 (w), 2188 (m), 1615 (s), 1467 (w), 1414 (m), 1383 (s), 1357 (m), 1318 (m), 1290 (w), 1223 (m), 1179 (m), 1105 (m), 1046 (s), 1024 (m), 979 (m), 947 (m), 844 (m), 794 (w), 755 (m), 696 (s), 668 (m), 645 (m), 613 (m).

**5,5,10-Trimethyl-3-oxo-8-oxa-10-aza-tricyclo[7.3.1.0<sup>2,7</sup>]trideca-2(7),11-diene-11-carbonitrile (4a)**

Following General Procedure (C); yellow solid, mp 84–86 °C, yield 82% (212 mg).

<sup>1</sup>H NMR (300 MHz, CDCl<sub>3</sub>) δ = 1.01 (s, 3H, Me), 1.02 (s, 3H, Me), 1.81 (t, 2H, <sup>3</sup>J = 2.6 Hz, CHCH<sub>2</sub>CH), 2.18 (s, 2H, CCH<sub>2</sub>), 2.26 (s, 2H, CCH<sub>2</sub>), 3.04 (s, 3H, NMe), 3.55–3.58 (m, 1H, CCHCH), 5.29 (q, 1H, <sup>3</sup>J = 2.2 Hz, NCHO), 5.88 (d, 1H, <sup>3</sup>J = 7.1 Hz, NCCCH). <sup>13</sup>C NMR (62.9 MHz, CDCl<sub>3</sub>): δ = 19.9 (CH), 25.0 (CH<sub>2</sub>), 27.8, 28.6 (CH<sub>3</sub>), 32.1 (C), 37.5 (CH<sub>3</sub>), 41.8, 50.2 (CH<sub>2</sub>), 83.6 (CH), 114.9, 115.0, 118.8 (C), 119.6 (CH), 169.2, 195.6 (C). MS (GC, 70 eV): *m/z* (%) = 258 (M<sup>+</sup>, 44), 243 (28), 201 (11), 119 (100). HRMS (ESI): calcd for C<sub>15</sub>H<sub>19</sub>N<sub>2</sub>O<sub>2</sub> (M + H) 259.1441, found 259.14439. IR (ATR, cm<sup>-1</sup>):  $\tilde{\nu}$  = 2968 (w), 2878 (w), 2226 (w), 1649 (s), 1620 (s), 1450 (w), 1407 (w), 1379 (s), 1342 (m), 1322 (s), 1278 (m), 1231 (w), 1202 (w), 1172 (m), 1155 (m), 1105 (m), 1075 (m), 1052 (s), 1030 (m), 980 (s), 917 (w), 901 (w), 830 (s), 815 (m), 761 (s), 605 (s), 593 (s).

**10-Allyl-5,5-dimethyl-3-oxo-8-oxa-10-aza-tricyclo[7.3.1.0<sup>2,7</sup>]trideca-2(7),11-diene-11-carbonitrile (4b)**

Following General Procedure (C); yellow solid, mp 95–97 °C, yield 77% (219 mg).

<sup>1</sup>H NMR (300 MHz, CDCl<sub>3</sub>) δ = 1.01 (s, 3H, Me), 1.03 (s, 3H, Me), 1.72–1.88 (m, 2H, CHCH<sub>2</sub>CH), 2.19 (s, 2H, CCH<sub>2</sub>), 2.25 (s, 2H, CCH<sub>2</sub>), 3.56–3.59 (m, 1H, CCHCH), 3.95–4.00 (m, 2H, NCH<sub>2</sub>CHCH<sub>2</sub>), 5.20–5.28 (m, 2H, NCH<sub>2</sub>CHCH<sub>2</sub>), 5.39 (m, 1H, NCHO), 5.75–5.86 (m, 1H, NCH<sub>2</sub>CHCH<sub>2</sub>), 5.90 (dd, 1H, <sup>3</sup>J = 7.4 Hz, <sup>4</sup>J = 1.4 Hz, NCCCH). <sup>13</sup>C NMR (62.9 MHz, CDCl<sub>3</sub>): δ = 20.0 (CH), 25.1 (CH<sub>2</sub>), 28.0, 28.6 (CH<sub>3</sub>), 32.1 (C), 41.8, 50.2, 53.1 (CH<sub>2</sub>), 81.9 (CH), 114.7, 115.0, 118.1 (C), 118.5 (CH<sub>2</sub>), 119.6, 133.5 (CH), 168.9, 195.7 (C). MS (GC, 70 eV): *m/z* (%) = 284 (M<sup>+</sup>, 11), 243 (100), 145 (10). HRMS (ESI): calcd for C<sub>17</sub>H<sub>21</sub>N<sub>2</sub>O<sub>2</sub> (M + H) 285.15975, found 285.1594. IR (ATR, cm<sup>-1</sup>):  $\tilde{\nu}$  = 2957 (w), 2874 (w), 2225 (w), 1643 (m), 1617 (s), 1455 (w), 1420 (m), 1382 (s), 1368 (m), 1344 (m), 1327 (w), 1290 (m), 1213 (w), 1185 (w), 1167 (m), 1118 (m), 1105 (m), 1046 (m), 1009 (w), 990 (m), 962 (m), 916 (m), 891 (w), 833 (m), 819 (m), 791 (m), 767 (m), 654 (m), 611 (m), 594 (m).

**10-Benzyl-5,5-dimethyl-3-oxo-8-oxa-10-aza-tricyclo[7.3.1.0<sup>2,7</sup>]trideca-2(7),11-diene-11-carbonitrile (4c)**

Following General Procedure (C); pale yellow solid, mp 129–131 °C, yield 67% (224 mg).

<sup>1</sup>H NMR (300 MHz, CDCl<sub>3</sub>) δ = 0.97 (s, 3H, Me), 1.00 (s, 3H, Me), 1.69–1.83 (m, 2H, CHCH<sub>2</sub>CH), 2.04–2.25 (m, 4H, 2 x CCH<sub>2</sub>), 3.58–3.60 (m, 1H, CCHCH), 4.48–4.60 (m, 2H, NCH<sub>2</sub>), 5.30 (q, 1H, <sup>3</sup>J = 2.6 Hz, NCHO), 5.93 (dd, 1H, <sup>3</sup>J = 7.2 Hz, <sup>4</sup>J = 1.1 Hz, NCCCH), 7.27–7.38 (m, 5H, CH<sub>Ar</sub>). <sup>13</sup>C NMR (75.5 MHz, CDCl<sub>3</sub>): δ = 20.1 (CH), 25.1 (CH<sub>2</sub>), 27.9, 28.6 (CH<sub>3</sub>), 32.0 (C), 41.6, 50.2, 53.9 (CH<sub>2</sub>), 81.2 (CH), 114.5, 115.2, 118.6 (C), 119.5 (CH), 127.8, 128.0, 128.7 (CH, Ar), 137.0, 168.9, 195.7 (C). MS (GC, 70 eV): *m/z* (%) = 334 (M<sup>+</sup>, 7), 243 (100), 91 (81). HRMS (ESI): calcd for C<sub>21</sub>H<sub>23</sub>N<sub>2</sub>O<sub>2</sub> (M + H) 335.1754, found 335.17563. IR (ATR, cm<sup>-1</sup>):  $\tilde{\nu}$  = 2955 (w), 2868 (w), 2223 (w), 1650 (s), 1618 (s), 1495 (w), 1449 (w), 1418 (w), 1382 (s), 1282 (w), 1199 (m), 1107 (s), 1055 (m), 1031 (m), 1002 (m), 964 (m), 917 (w), 835 (m), 770 (m), 729 (s), 696 (s), 591 (m).

**5,5,12-Trimethyl-3-oxo-8-oxa-12-aza-tricyclo[7.3.1.0<sup>2,7</sup>]trideca-2(7),10-diene-10-carbonitrile (5)**

Following General Procedure (A); yellow solid, mp 117–119 °C, yield 20% (52 mg).

<sup>1</sup>H NMR (300 MHz, CDCl<sub>3</sub>) δ = 1.00 (s, 3H, Me), 1.03 (s, 3H, Me), 1.70–1.86 (m, 2H, CHCH<sub>2</sub>CH), 2.20–2.38 (m, 4H, CCH<sub>2</sub>), 3.16 (s, 3H, NMe), 4.44–4.45 (m, 1H, NCHC), 5.02 (q, 1H, <sup>3</sup>J = 2.7 Hz, NCCCHO), 6.89 (s, 1H, MeNCHC). <sup>13</sup>C NMR (62.9 MHz, CDCl<sub>3</sub>): δ = 25.2 (CH<sub>2</sub>), 27.4, 28.9 (CH<sub>3</sub>), 32.3 (C), 41.7 (CH<sub>2</sub>), 42.4 (CH<sub>3</sub>), 44.0 (CH), 50.4 (CH<sub>2</sub>), 84.2, 68.1 (CH), 75.0, 111.0, 121.7 (C), 149.4 (CH), 171.5, 196.9 (C). MS (GC, 70 eV): *m/z* (%) = 258 (M<sup>+</sup>, 41), 243 (100), 119 (71). HRMS (ESI): calcd for C<sub>15</sub>H<sub>19</sub>N<sub>2</sub>O<sub>2</sub> (M + H) 259.1441, found 259.14412. IR (ATR, cm<sup>-1</sup>):  $\tilde{\nu}$  = 2961 (w), 2187 (s), 1642 (m), 1612 (s), 1467 (w), 1414 (w), 1391 (s), 1381 (s), 1336 (s), 1319 (m), 1206 (m), 1163 (w), 1122 (s), 1082 (w), 1038 (s), 981 (m), 958 (m), 922 (w), 843 (m), 798 (w), 772 (w), 709 (m), 681 (m), 605 (m), 570 (m).

**12-Acetyl-10-methyl-8-oxa-10-aza-tricyclo[7.3.1.0<sup>2,7</sup>]trideca-2(7),11-dien-3-one (6a)**

Following General Procedure (A); yellow solid, mp 108–110 °C, yield 90% (222 mg).

<sup>1</sup>H NMR (300 MHz, CDCl<sub>3</sub>) δ = 1.65–1.93 (m, 4H, CH<sub>2</sub>), 2.13 (s, 3H, COMe), 2.28–2.40 (m, 4H, CCH<sub>2</sub>), 3.24 (s, 3H, NMe), 4.42–4.43 (m, 1H, COCCH), 5.60 (s, 1H, NCHO), 7.34 (s, 1H, MeNCHC). <sup>13</sup>C NMR (75.5 MHz, CDCl<sub>3</sub>): δ = 20.6 (CH<sub>2</sub>), 24.2 (CH), 25.5, 28.3, 36.4 (CH<sub>2</sub>), 42.8, 44.7 (CH<sub>3</sub>), 65.6 (CH), 109.2, 112.5 (C), 149.2 (CH), 174.0, 192.0, 197.2 (C). MS (GC, 70 eV): *m/z* (%) = 247 (M<sup>+</sup>, 67), 232 (79), 204 (24), 136 (100). HRMS (EI): calcd for C<sub>14</sub>H<sub>17</sub>NO<sub>3</sub> (M<sup>+</sup>) 247.12029, found 247.120569. IR (ATR, cm<sup>-1</sup>):  $\tilde{\nu}$  = 2939 (w), 1636 (m), 1593 (s), 1574 (s), 1415 (m), 1381 (s), 1341 (s), 1298 (m), 1172 (s), 1126 (s), 1065 (m), 1025 (s), 971 (m), 958 (m), 933 (m), 915 (m), 860 (m), 826 (s), 713 (m), 867 (m), 601 (m).

**12-Benzoyl-10-methyl-8-oxa-10-aza-tricyclo[7.3.1.0<sup>2,7</sup>]trideca-2(7),11-dien-3-one (6b)**

Following General Procedure (A); yellow solid, mp 108–110 °C, yield 75% (232 mg).

<sup>1</sup>H NMR (300 MHz, CDCl<sub>3</sub>) δ = 1.70–2.02 (m, 4H, 2 x CH<sub>2</sub>), 2.35 (t, 2H, <sup>3</sup>J = 6.3 Hz, CH<sub>2</sub>CH<sub>2</sub>CH<sub>2</sub>), 2.46 (t, 2H, <sup>3</sup>J = 6.3 Hz, CH<sub>2</sub>CH<sub>2</sub>CH<sub>2</sub>), 3.20 (s, 3H, NMe), 4.49 (br. q, 1H,

$^3J = 2.1$  Hz, COCCH), 5.81 (br. q, 1H,  $^3J = 2.3$  Hz, NCHO), 7.16 (s, 1H, MeNCH), 7.35-7.47 (m, 5H, CH<sub>Ar</sub>).  $^{13}\text{C}$  NMR (62.9 MHz, CDCl<sub>3</sub>):  $\delta = 20.7, 25.4, 28.4, 36.5$  (CH<sub>2</sub>), 42.9, 44.9 (CH), 65.7 (CH<sub>3</sub>), 108.4, 112.4 (C), 128.0, 128.1, 129.7 (CH, Ar), 140.4 (C), 152.4 (CH), 174.3, 191.6, 197.1 (C). MS (GC, 70 eV):  $m/z$  (%) = 309 (M<sup>+</sup>, 25), 294 (25), 198 (100), 105 (18). HRMS (ESI): calcd for C<sub>19</sub>H<sub>20</sub>NO<sub>3</sub> (M + H) 310.14377, found 310.14336. IR (ATR, cm<sup>-1</sup>):  $\tilde{\nu} = 2943$  (w), 1592 (s), 1556 (s), 1413 (m), 1376 (s), 1329 (s), 1306 (s), 1198 (m), 1181 (m), 1124 (s), 1032 (s), 968 (m), 909 (m), 895 (m), 838 (m), 816 (m), 793 (w), 724 (s), 699 (s), 644 (m), 592 (m).

***10-Methyl-3-oxo-8-oxa-10-aza-tricyclo[7.3.1.0<sup>2,7</sup>]trideca-2(7),11-diene-12-carboxylic acid ethyl ester (6c)***

Following General Procedure (A); light orange solid, mp 99–101 °C, yield 88% (244 mg).

$^1\text{H}$  NMR (300 MHz, CDCl<sub>3</sub>)  $\delta = 1.25$  (t, 3H,  $^3J = 7.1$  Hz, OCH<sub>2</sub>CH<sub>3</sub>), 1.63-1.94 (m, 4H, CH<sub>2</sub>), 2.29-2.42 (m, 4H, CCH<sub>2</sub>), 3.19 (s, 3H, NMe), 4.15 (m, 2H, OCH<sub>2</sub>CH<sub>3</sub>), 4.41-4.42 (m, 1H, COCCH), 5.46-5.49 (m, 1H, NCHO), 7.43 (s, 1H, MeNCHC).  $^{13}\text{C}$  NMR (63 MHz, CDCl<sub>3</sub>):  $\delta = 14.6$  (CH<sub>3</sub>), 20.7, 25.6, 28.4, 36.5 (CH<sub>2</sub>), 42.5, 44.5 (CH), 59.2 (CH<sub>2</sub>), 66.9 (CH<sub>3</sub>), 96.1, 112.6 (C), 148.2 (CH), 167.2, 173.9, 197.3 (C). MS (GC, 70 eV):  $m/z$  (%) = 277 (M<sup>+</sup>, 59), 262 (81), 248 (23), 232 (20), 166 (100), 138 (37). HRMS (EI): calcd for C<sub>15</sub>H<sub>19</sub>NO<sub>4</sub> (M<sup>+</sup>) 277.13086, found 277.131066. IR (ATR, cm<sup>-1</sup>):  $\tilde{\nu} = 3451$  (w), 2941 (w), 1976 (m), 1643 (m), 1603 (s), 1388 (s), 1376 (s), 1325 (m), 1293 (s), 1277 (s), 1221 (w), 1163 (s), 1125 (s), 1066 (s), 1032 (s), 963 (m), 859 (w), 822 (m), 769 (m), 695 (w).

***10-Methyl-3-oxo-8-oxa-10-aza-tricyclo[7.3.1.0<sup>2,7</sup>]trideca-2(7),11-diene-12-carbonitrile (6d)***

Following General Procedure (A); light pink solid, mp 150–152 °C, yield 61% (140 mg).

$^1\text{H}$  NMR (300 MHz, CDCl<sub>3</sub>)  $\delta = 1.79$ -1.95 (m, 4H, 2 x CH<sub>2</sub>), 2.30-2.38 (m, 4H, 2 x CH<sub>2</sub>), 3.08 (s, 3H, NMe), 3.66 (s, 1H, CNCCCH), 5.21 (s, 1H, NCHO), 6.67 (s, 1H, MeNCH).  $^{13}\text{C}$  NMR (62.9 MHz, CDCl<sub>3</sub>):  $\delta = 20.4$  (CH), 20.5, 25.1, 27.7, 36.1 (CH<sub>2</sub>), 40.4 (CH<sub>3</sub>), 81.7 (CH), 84.0, 116.8, 120.0 (C), 145.2 (CH), 168.7, 195.6 (C). MS (GC, 70 eV):  $m/z$  (%) = 230 (M<sup>+</sup>, 53), 213 (43), 174 (46), 146 (29), 119 (100). HRMS (EI): calcd for C<sub>13</sub>H<sub>14</sub>N<sub>2</sub>O<sub>2</sub> (M<sup>+</sup>) 230.104526, found 230.10498. IR (ATR, cm<sup>-1</sup>):  $\tilde{\nu} = 2952$  (w), 2187 (m), 1651 (m), 1622 (s), 1491 (w), 1434 (w), 1384 (s), 1331 (m), 1316 (m), 1288 (w), 1219 (w), 1190 (m), 1120 (s), 1094 (m), 1057 (m), 1028 (s), 966 (s), 930 (m), 911 (m), 870 (m), 811 (s), 744 (m), 723 (m), 661 (m), 622 (s), 593 (m), 573 (s).

***12-Acetyl-10-ethyl-8-oxa-10-aza-tricyclo[7.3.1.0<sup>2,7</sup>]trideca-2(7),11-dien-3-one (6e)***

Following General Procedure (A); yellow solid, mp 82–84 °C, yield 74% (193 mg).

$^1\text{H}$  NMR (250 MHz, CDCl<sub>3</sub>)  $\delta = 1.26$  (t, 3H,  $^3J = 7.0$  Hz, NCH<sub>2</sub>CH<sub>3</sub>), 1.56-1.94 (m, 1H, CHCH<sub>2</sub>CH), 1.85-1.94 (m, 3H, CHCH<sub>2</sub>CH, CH<sub>2</sub>), 2.16 (s, 3H, COMe), 2.28-2.41 (m, 4H, 2 x CH<sub>2</sub>), 3.23-3.38 (m, 1H, NCH<sub>2</sub>CH<sub>3</sub>), 3.74-3.88 (m, 1H, NCH<sub>2</sub>CH<sub>3</sub>), 4.55 (s, 1H, COCCH), 5.62 (s, 1H, NCHO), 7.42 (s, 1H, MeNCHC).  $^{13}\text{C}$  NMR (62.9 MHz, CDCl<sub>3</sub>):  $\delta = 15.2$  (CH<sub>3</sub>), 20.7 (CH<sub>2</sub>), 24.4 (CH), 26.1, 28.3, 36.5 (CH<sub>2</sub>), 42.9 (CH<sub>3</sub>), 49.9 (CH<sub>2</sub>), 66.2 (CH), 100.4, 112.6 (C), 147.6 (CH), 173.9, 192.0, 197.2 (C). MS (GC, 70 eV):  $m/z$  (%) = 261 (M<sup>+</sup>, 63), 232 (100), 218 (26), 190 (11), 176 (20), 150 (50), 122 (16). HRMS (ESI): calcd for

C<sub>15</sub>H<sub>20</sub>NO<sub>3</sub> (M + H) 262.14377, found 262.14352. IR (ATR, cm<sup>-1</sup>):  $\tilde{\nu}$  = 2932 (w), 1640 (w), 1593 (s), 1573 (s), 1427 (w), 1380 (s), 1350 (s), 1301 (m), 1263 (m), 1220 (m), 1194 (m), 1163 (s), 1128 (m), 1063 (m), 1027 (s), 974 (m), 930 (m), 913 (m), 858 (w), 819 (m), 732 (w), 711 (w), 684 (w), 607 (m).

**12-Benzoyl-10-ethyl-8-oxa-10-aza-tricyclo[7.3.1.0<sup>2,7</sup>]trideca-2(7),11-dien-3-one (6f)**

Following General Procedure (A); yellow solid, mp 135–137 °C, yield 45% (145 mg).

<sup>1</sup>H NMR (300 MHz, CDCl<sub>3</sub>)  $\delta$  = 1.19 (t, 3H, <sup>3</sup>J = 7.2 Hz, NCH<sub>2</sub>CH<sub>3</sub>), 1.62–1.68 (m, 1H, CH<sub>2</sub>), 1.90–1.98 (m, 3H, CH<sub>2</sub>), 2.32–2.36 (m, 2H, CH<sub>2</sub>), 2.43–2.47 (m, 2H, CH<sub>2</sub>), 3.16–3.27 (m, 1H, NCH<sub>2</sub>CH<sub>3</sub>), 3.71–3.83 (m, 1H, NCH<sub>2</sub>CH<sub>3</sub>), 4.58–4.59 (m, 1H, COCCH), 5.82 (br. q, 1H, <sup>4</sup>J = 2.9 Hz, NCHO), 7.24 (s, 1H, EtNCH), 7.35–7.47 (m, 5H, Ph). <sup>13</sup>C NMR (62.9 MHz, CDCl<sub>3</sub>):  $\delta$  = 15.0 (CH<sub>3</sub>), 20.7, 26.0, 28.4, 36.5 (CH<sub>2</sub>), 43.0 (CH), 50.0 (CH<sub>2</sub>), 65.9 (CH<sub>3</sub>), 108.4, 112.5 (C), 128.0, 128.1, 129.7 (Ph), 140.5 (C), 151.1 (CH), 174.2, 191.5, 197.1 (C). MS (GC, 70 eV):  $m/z$  (%) = 323 (M<sup>+</sup>, 67), 294 (84), 212 (100), 184 (24), 105 (92). HRMS (EI): calcd for C<sub>20</sub>H<sub>21</sub>NO<sub>3</sub> (M<sup>+</sup>) 323.15160, found 323.151205. IR (ATR, cm<sup>-1</sup>):  $\tilde{\nu}$  = 2935 (w), 1735 (w), 1643 (w), 1592 (s), 1557 (s), 1443 (w), 1427 (w), 1377 (s), 1357 (m), 1304 (m), 1261 (s), 1223 (m), 1196 (m), 1131 (s), 1102 (m), 1061 (m), 1030 (s), 971 (m), 901 (m), 859 (m), 812 (s), 795 (m), 728 (s), 699 (s), 655 (s).

**12-Acetyl-10-allyl-8-oxa-10-aza-tricyclo[7.3.1.0<sup>2,7</sup>]trideca-2(7),11-dien-3-one (6g)**

Following General Procedure (A); yellow solid, mp 97–99 °C, yield 58% (158 mg).

<sup>1</sup>H NMR (300 MHz, CDCl<sub>3</sub>)  $\delta$  = 1.58–1.93 (m, 4H, CH<sub>2</sub>), 2.15 (s, 3H, COMe), 2.28–2.40 (m, 4H, 2 x CH<sub>2</sub>), 3.82–3.89 (m, 1H, NCH<sub>2</sub>CHCH<sub>2</sub>), 4.32–4.51 (m, 1H, NCH<sub>2</sub>CHCH<sub>2</sub>), 4.50–4.51 (m, 1H, COCCH), 5.24–5.35 (m, 2H, NCH<sub>2</sub>CHCH<sub>2</sub>), 5.62 (s, 1H, NCHO), 5.74–5.87 (m, 1H, NCH<sub>2</sub>CHCH<sub>2</sub>), 7.39 (s, 1H, NCHCCO). <sup>13</sup>C NMR (62.9 MHz, CDCl<sub>3</sub>):  $\delta$  = 20.6 (CH<sub>2</sub>), 24.3 (CH), 25.9, 28.3, 36.4 (CH<sub>2</sub>), 43.1 (CH<sub>3</sub>), 57.6 (CH<sub>2</sub>), 65.7 (CH), 109.6, 112.7 (C), 118.8 (CH<sub>2</sub>), 133.2, 148.3 (CH), 174.0, 192.3, 197.2 (C). MS (GC, 70 eV):  $m/z$  (%) = 273 (M<sup>+</sup>, 100), 232 (71), 176 (19), 162 (45), 135 (18). HRMS (EI): calcd for C<sub>16</sub>H<sub>19</sub>NO<sub>3</sub> (M<sup>+</sup>) 273.13594, found 273.135508. IR (ATR, cm<sup>-1</sup>):  $\tilde{\nu}$  = 2937(w), 1638 (m), 1595 (s), 1567 (s), 1435 (m), 1380 (s), 1351 (s), 1301 (m), 1236 (m), 1213 (s), 1182 (s), 1154 (s), 1115 (s), 1066 (m), 1028 (s), 1001 (m), 971 (m), 939 (s), 911 (s), 864 (m), 823 (s), 761 (m), 661 (m).

**10-Allyl-12-benzoyl-8-oxa-10-aza-tricyclo[7.3.1.0<sup>2,7</sup>]trideca-2(7),11-dien-3-one (6h)**

Following General Procedure (A); yellow solid, mp 97–99 °C, yield 50% (168 mg).

<sup>1</sup>H NMR (300 MHz, CDCl<sub>3</sub>)  $\delta$  = 1.67–1.73 (m, 1H, CH<sub>2</sub>), 1.90–1.99 (m, 3H, 2 x CH<sub>2</sub>), 2.34–2.50 (m, 4H, 2 x CH<sub>2</sub>), 3.74–3.81 (m, 1H, NCH<sub>2</sub>CHCH<sub>2</sub>), 4.32–4.39 (m, 1H, NCH<sub>2</sub>CHCH<sub>2</sub>), 4.58–4.59 (m, 1H, CCHCH<sub>2</sub>), 5.21–5.34 (m, 2H, NCH<sub>2</sub>CHCH<sub>2</sub>), 5.70–5.87 (m, 2H, NCH<sub>2</sub>CHCH<sub>2</sub>, NCHO), 7.24 (s, 1H, NCHC), 7.34–7.49 (m, 5H, CH<sub>Ar</sub>). <sup>13</sup>C NMR (62.9 MHz, CDCl<sub>3</sub>):  $\delta$  = 20.7, 25.8, 28.4, 36.5 (CH<sub>2</sub>), 43.1 (CH), 57.6 (CH<sub>2</sub>), 65.9 (CH), 108.8, 112.6 (C), 118.9 (CH<sub>2</sub>), 128.0, 128.1, 129.8 (CH, Ar), 133.0 (CH), 140.3 (C), 151.6 (CH), 174.2, 191.7, 197.2 (C). MS (GC, 70 eV):  $m/z$  (%) = 335 (M<sup>+</sup>, 82), 294 (43), 224 (59), 184 (23), 105 (100). HRMS (ESI): calcd for C<sub>21</sub>H<sub>22</sub>NO<sub>3</sub> (M + H) 336.15942, found 336.15971. IR (ATR, cm<sup>-1</sup>):  $\tilde{\nu}$  = 2942 (w), 2240 (w), 1640 (w), 1592 (s), 1556 (s), 1427 (w), 1377 (s), 1344 (m),



1305 (m), 1218 (s), 1196 (m), 1119 (m), 1102 (m), 1062 (w), 1032 (s), 962 (w), 916 (m), 860 (w), 818 (m), 724 (s), 700 (s), 643 (m).

**10-Allyl-3-oxo-8-oxa-10-aza-tricyclo[7.3.1.0<sup>2,7</sup>]trideca-2(7),11-diene-12-carbonitrile (6i)**

Following General Procedure (B); yellow solid, mp 118–120 °C, yield 75% (192 mg).

<sup>1</sup>H NMR (250 MHz, CDCl<sub>3</sub>) δ = 1.68–1.96 (m, 4H, 2 x CH<sub>2</sub>), 2.30–2.38 (m, 4H, 2 x CH<sub>2</sub>), 3.69–3.70 (m, 1H, NCCCH), 3.77–3.98 (m, 2H, NCH<sub>2</sub>CHCH<sub>2</sub>), 5.14–5.32 (m, 3H, NCH<sub>2</sub>CHCH<sub>2</sub>, NCHO), 5.70–5.86 (m, 1H, NCH<sub>2</sub>CHCH<sub>2</sub>), 6.72 (s, 1H, NCHC). <sup>13</sup>C NMR (62.9 MHz, CDCl<sub>3</sub>): δ = 20.5 (CH), 20.8, 25.3, 27.7, 36.1, 55.8 (CH<sub>2</sub>), 80.3 (CH), 84.6, 116.7 (C), 118.6 (CH<sub>2</sub>), 120 (C), 133.0, 144.4 (CH), 168.8, 195.6 (C). MS (GC, 70 eV): *m/z* (%) = 256 (M<sup>+</sup>, 37), 239 (24), 215 (100), 200 (15), 172 (17), 145 (26). HRMS (ESI): calcd for C<sub>15</sub>H<sub>17</sub>N<sub>2</sub>O<sub>2</sub> (M + H) 257.12845, found 257.12873. IR (ATR, cm<sup>-1</sup>):  $\tilde{\nu}$  = 2943 (w), 2193 (m), 1625 (s), 1603 (s), 1415 (m), 1385 (s), 1319 (m), 1284 (w), 1232 (m), 1197 (s), 1122 (m), 1060 (m), 1027 (s), 972 (m), 936 (s), 913 (s), 870 (m), 820 (s), 740 (m), 681 (m), 659 (m), 624 (m).

**12-Acetyl-10-benzyl-8-oxa-10-aza-tricyclo[7.3.1.0<sup>2,7</sup>]trideca-2(7),11-dien-3-one (6j)**

Following General Procedure (A); yellow solid, mp 58–60 °C, yield 50% (162 mg).

<sup>1</sup>H NMR (300 MHz, CDCl<sub>3</sub>) δ = 1.46–1.52 (m, 1H, CH<sub>2</sub>), 1.79 (t, 1H, <sup>3</sup>J = 7.2 Hz, CH<sub>2</sub>), 1.85–1.97 (m, 2H, CH<sub>2</sub>), 2.18 (s, 3H, CH<sub>3</sub>), 2.23–2.42 (m, 4H, 2 x CH<sub>2</sub>), 4.40 (d, 1H, <sup>2</sup>J = 14.8 Hz, CH<sub>2</sub>Ph), 4.46–4.47 (m, 1H, COCCH), 4.93 (d, 1H, <sup>2</sup>J = 14.8 Hz, CH<sub>2</sub>Ph), 5.61 (s, 1H, NCHO), 7.30–7.37 (m, 5H, CH<sub>Ar</sub>), 7.54 (s, 1H, NCHC). <sup>13</sup>C NMR (62.9 MHz, DMSO): δ = 20.4 (CH<sub>2</sub>), 24.3 (CH), 25.4, 27.6, 35.9 (CH<sub>2</sub>), 41.6 (CH<sub>3</sub>), 57.4 (CH<sub>2</sub>), 65.0 (CH), 108.9, 112.2 (C), 127.6, 127.7, 128.7 (CH, Ar), 137.5 (c), 149.5 (CH), 173.2, 190.7, 196.2 (C). MS (GC, 70 eV): *m/z* (%) = 323 (M<sup>+</sup>, 36), 301 (33), 260 (30), 232 (72), 176 (13), 162 (36), 106 (28), 91 (93), 41 (100). HRMS (EI): calcd for C<sub>20</sub>H<sub>21</sub>NO<sub>3</sub> (M<sup>+</sup>) 323.1516, found 323.151743. IR (ATR, cm<sup>-1</sup>):  $\tilde{\nu}$  = 2938 (w), 1640 (w), 1595 (s), 1573 (s), 1428 (w), 1382 (s), 1352 (s), 1300 (m), 1194 (s), 1153 (m), 1119 (m), 1062 (m), 1028 (s), 971 (m), 932 (m), 914 (m), 859 (w), 821 (m), 740 (m), 699 (m), 602 (m).

**12-Benzoyl-10-benzyl-8-oxa-10-aza-tricyclo[7.3.1.0<sup>2,7</sup>]trideca-2(7),11-dien-3-one (6k)**

Following General Procedure (A); orange solid, mp 153–155 °C, yield 55% (212 mg).

<sup>1</sup>H NMR (300 MHz, CDCl<sub>3</sub>) δ = 1.55 (dt, 1H, <sup>2</sup>J = 13.4 Hz, <sup>3</sup>J = 2.7 Hz, CHCH<sub>2</sub>CH), 1.86 (dt, 1H, <sup>2</sup>J = 13.4 Hz, <sup>3</sup>J = 2.8 Hz, CHCH<sub>2</sub>CH), 1.92–2.01 (m, 2H, CH<sub>2</sub>CH<sub>2</sub>CH<sub>2</sub>), 2.38 (t, 2H, <sup>3</sup>J = 7.1 Hz, CH<sub>2</sub>), 2.48 (t, 2H, <sup>3</sup>J = 6.4 Hz, CH<sub>2</sub>), 4.31 (d, 1H, <sup>2</sup>J = 14.4 Hz, NCH<sub>2</sub>), 4.51–4.52 (m, 1H, OCCCH), 4.90 (d, 1H, <sup>2</sup>J = 14.4 Hz, NCH<sub>2</sub>), 5.83 (q, 1H, <sup>3</sup>J = 2.7 Hz, NCHO), 7.27–7.50 (m, 11H, NCHC, CH<sub>Ar</sub>). <sup>13</sup>C NMR (62.9 MHz, CDCl<sub>3</sub>): δ = 20.8, 25.9, 28.4, 36.5 (CH<sub>2</sub>), 42.8 (CH), 59.1 (CH<sub>2</sub>), 65.9 (CH), 108.7, 112.6 (C), 127.9, 128.0, 128.1, 128.2, 128.9, 129.9 (CH, Ar), 136.4, 140.4 (C), 151.8 (CH), 174.4, 191.8, 197.3 (C). MS (GC, 70 eV): *m/z* (%) = 385 (M<sup>+</sup>, 43), 294 (50), 280 (15), 183 (30), 105 (62), 91 (100). HRMS (ESI): calcd for C<sub>25</sub>H<sub>24</sub>NO<sub>3</sub> (M + H) 386.17507, found 386.17549. IR (ATR, cm<sup>-1</sup>):  $\tilde{\nu}$  = 2945 (w), 1738 (w), 1636 (w), 1592 (s), 1556 (s), 1493 (w), 1431 (m), 1377 (s), 1346 (s), 1305 (m), 1232 (m),

1220 (s), 1196 (m), 1113 (s), 1064 (m), 1033 (s), 993 (m), 970 (m), 914 (m), 888 (m), 842 (m), 820 (m), 800 (m), 728 (s), 704 (s), 658 (m).

**10-Benzyl-3-oxo-8-oxa-10-aza-tricyclo[7.3.1.0<sup>2,7</sup>]trideca-2(7),11-diene-12-carbonitrile (6l)**

Following General Procedure (B); light pink solid, mp 145–147 °C, yield 64% (196 mg).

<sup>1</sup>H NMR (250 MHz, CDCl<sub>3</sub>) δ = 1.69–1.95 (m, 4H, 2 x CH<sub>2</sub>), 2.16–2.36 (m, 4H, 2 x CH<sub>2</sub>), 3.71 (s, 1H, CNCCCH), 4.35–4.56 (m, 2H, NCH<sub>2</sub>), 5.28–5.31 (m, 1H, NCHO), 6.84 (s, 1H NCHCCN), 7.16–7.19 (m, 2H, CH<sub>Ar</sub>), 7.31–7.36 (m, 3H, CH<sub>Ar</sub>). <sup>13</sup>C NMR (62.9 MHz, CDCl<sub>3</sub>): δ = 20.5 (CH), 20.9, 25.4, 27.6, 36.2, 57.2 (CH<sub>2</sub>), 80.4 (CH), 85.0, 116.7, 119.9 (C), 127.5, 128.2, 128.9 (CH, Ar), 136.3 (C), 144.7 (CH), 168.7, 195.6 (C). MS (GC, 70 eV): *m/z* (%) = 306 (M<sup>+</sup>, 19), 222 (12), 215 (73), 91 (100). HRMS (ESI): calcd for C<sub>19</sub>H<sub>19</sub>N<sub>2</sub>O<sub>2</sub> (M + H) 307.1441, found 307.14387. IR (ATR, cm<sup>-1</sup>):  $\tilde{\nu}$  = 2976 (w), 2193 (m), 1625 (s), 1448 (w), 1420 (m), 1386 (s), 1315 (w), 1222 (w), 1195 (m), 1117 (m), 1063 (m), 1034 (s), 982 (m), 957 (w), 916 (m), 872 (w), 827 (s), 756 (m), 740 (m), 699 (s), 633 (s), 588 (m).

**10-Methyl-3-oxo-8-oxa-10-aza-tricyclo[7.3.1.0<sup>2,7</sup>]trideca-2(7),11-diene-11-carbonitrile (7a)**

Following General Procedure (C); pale yellow solid, mp 116–117 °C, yield 68% (156 mg).

<sup>1</sup>H NMR (300 MHz, CDCl<sub>3</sub>) δ = 1.79–1.80 (m, 2H, CHCH<sub>2</sub>CH), 1.93 (quintet, 2H, <sup>3</sup>*J* = 6.7 Hz, CH<sub>2</sub>CH<sub>2</sub>CH<sub>2</sub>), 2.29–2.34 (m, 2H, CH<sub>2</sub>), 2.39 (t, 2H, <sup>3</sup>*J* = 6.0 Hz, CH<sub>2</sub>), 3.05 (s, 3H, NMe), 3.55–3.58 (m, 1H, CCHCH), 5.29 (q, 1H, <sup>3</sup>*J* = 2.3 Hz, NCHO), 5.87 (d, 1H, <sup>3</sup>*J* = 7.2 Hz, NCCCH). <sup>13</sup>C NMR (62.9 MHz, CDCl<sub>3</sub>): δ = 20.0 (CH), 20.6, 25.0, 27.9, 36.2 (CH<sub>2</sub>), 37.6 (CH<sub>3</sub>), 83.6 (CH), 115.0, 116.3, 118.8 (C), 119.6 (CH), 170.8, 195.9 (C). MS (GC, 70 eV): *m/z* (%) = 230 (M<sup>+</sup>, 70), 215 (29), 174 (10), 119 (100). HRMS (ESI): calcd for C<sub>13</sub>H<sub>15</sub>N<sub>2</sub>O<sub>2</sub> (M + H) 231.1128, found 231.1133. IR (ATR, cm<sup>-1</sup>):  $\tilde{\nu}$  = 2950 (w), 2227 (w), 1636 (s), 1614 (s), 1597 (w), 1470 (w), 1433 (w), 1381 (m), 1326 (m), 1284 (w), 1235 (w), 1201 (w), 1171 (m), 1114 (m), 1081 (m), 1047 (m), 1019 (m), 978 (m), 951 (w), 912 (m), 810 (m), 767 (s), 711 (m), 605 (m), 589 (s).

**10-Allyl-3-oxo-8-oxa-10-aza-tricyclo[7.3.1.0<sup>2,7</sup>]trideca-2(7),11-diene-11-carbonitrile (7b)**

Following General Procedure (C); pale yellow solid, mp 90–92 °C, yield 62% (160 mg).

<sup>1</sup>H NMR (300 MHz, CDCl<sub>3</sub>) δ = 1.70–1.87 (m, 2H, CH<sub>2</sub>), 1.92 (quintet, 2H, <sup>3</sup>*J* = 6.4 Hz, CH<sub>2</sub>CH<sub>2</sub>CH<sub>2</sub>), 2.29–2.40 (m, 4H, 2 x CH<sub>2</sub>), 3.56–3.59 (m, 1H, CCHCH), 3.97–3.99 (m, 2H, NCH<sub>2</sub>CHCH<sub>2</sub>), 5.20–5.27 (m, 2H, NCH<sub>2</sub>CHCH<sub>2</sub>), 5.37–5.39 (m, 1H, NCHO), 5.75–5.86 (m, 1H, NCH<sub>2</sub>CHCH<sub>2</sub>), 5.89 (dd, 1H, <sup>3</sup>*J* = 7.2 Hz, <sup>4</sup>*J* = 1.3 Hz, NCCCH). <sup>13</sup>C NMR (75.5 MHz, CDCl<sub>3</sub>): δ = 20.2 (CH), 20.6, 25.0, 28.0, 36.2, 52.9 (CH<sub>2</sub>), 81.7 (CH), 115.0, 116.0, 118.1 (C), 118.3 (CH<sub>2</sub>), 119.4, 133.5 (CH), 170.5, 196.0 (C). MS (GC, 70 eV): *m/z* (%) = 256 (M<sup>+</sup>, 13), 215 (100), 145 (12). HRMS (ESI): calcd for C<sub>15</sub>H<sub>17</sub>N<sub>2</sub>O<sub>2</sub> (M + H) 257.12845, found 257.12833. IR (ATR, cm<sup>-1</sup>):  $\tilde{\nu}$  = 2942 (w), 2226 (w), 1644 (s), 1614 (s), 1446 (w), 1432 (w), 1383 (s), 1328 (m), 1285 (m), 1236 (w), 1195 (m), 1162 (m), 1141 (m), 1104 (m), 1048 (m), 1025 (m), 967 (m), 934 (s), 914 (s), 808 (s), 790 (s), 770 (s), 630 (m), 606 (m), 587 (s).

***10-Benzyl-3-oxo-8-oxa-10-aza-tricyclo[7.3.1.0<sup>2,7</sup>]trideca-2(7),11-diene-11-carbonitrile (7c)***

Following General Procedure (C); yellow solid, mp 127–128 °C, yield 74% (227 mg).

<sup>1</sup>H NMR (300 MHz, CDCl<sub>3</sub>) δ 1.69–1.93 (m, 4H, 2 x CH<sub>2</sub>), 2.11–2.37 (m, 4H, 2 x CH<sub>2</sub>), 3.57–3.60 (m, 1H, CCHCH), 4.49–4.61 (m, 2H, NCH<sub>2</sub>), 5.30 (q, 1H, <sup>3</sup>J = 2.6 Hz, NCHO), 5.95 (dd, 1H, <sup>3</sup>J = 7.4 Hz, <sup>4</sup>J = 1.1 Hz, NCCCH), 7.25–7.38 (m, 5H, CH<sub>Ar</sub>). <sup>13</sup>C NMR (75.5 MHz, CDCl<sub>3</sub>): δ = 20.2 (CH), 20.6, 25.1, 27.8, 36.2, 53.9 (CH<sub>2</sub>), 81.1 (CH), 115.2, 115.6, 118.7 (C), 119.6 (CH), 127.8, 127.9, 128.7 (CH, Ar), 137.2, 170.5, 196.0 (C). MS (GC, 70 eV): *m/z* (%) = 306 (M<sup>+</sup>, 8), 215 (100), 91 (82). HRMS (ESI): calcd for C<sub>19</sub>H<sub>19</sub>N<sub>2</sub>O<sub>2</sub> (M + H) 307.1441, found 307.14459. IR (ATR, cm<sup>-1</sup>):  $\tilde{\nu}$  = 2928 (w), 2224 (w), 1650 (m), 1616 (s), 1495 (w), 1450 (w), 1418 (m), 1384 (m), 1358 (w), 1282 (w), 1192 (w), 1170 (w), 1123 (m), 1060 (m), 1026 (m), 999 (m), 968 (m), 942 (w), 913 (m), 813 (m), 785 (m), 736 (s), 694 (s), 607 (m), 589 (m).

***12-Methyl-3-oxo-8-oxa-12-aza-tricyclo[7.3.1.0<sup>2,7</sup>]trideca-2(7),10-diene-10-carbonitrile (8)***

Following General Procedure (A); yellow solid, mp 95–97 °C, yield 32% (74 mg).

<sup>1</sup>H NMR (300 MHz, CDCl<sub>3</sub>) δ = 1.64–2.02 (m, 4H, 2 x CH<sub>2</sub>), 2.32–2.47 (m, 4H, CH<sub>2</sub>), 3.18 (s, 3H, NMe), 4.43–4.44 (m, 1H, NCHC), 5.02 (q, 1H, <sup>3</sup>J = 2.8 Hz, NCCCHO), 6.90 (s, 1H, MeNCHC). <sup>13</sup>C NMR (62.9 MHz, CDCl<sub>3</sub>): δ = 20.6, 25.5, 28.1, 36.4 (CH<sub>2</sub>), 68.0 (CH<sub>3</sub>), 74.8, 112.3, 121.7 (C), 149.5 (CH), 173.0, 197.2 (C). MS (GC, 70 eV): *m/z* (%) = 230 (M<sup>+</sup>, 61), 215 (100), 119 (63). HRMS (EI): calcd for C<sub>13</sub>H<sub>14</sub>N<sub>2</sub>O<sub>2</sub> (M<sup>+</sup>) 230.10498, found 230.104576. IR (ATR, cm<sup>-1</sup>):  $\tilde{\nu}$  = 2936 (w), 2184 (s), 1645 (m), 1612 (s), 1455 (w), 1411 (m), 1389 (s), 1331 (s), 1240 (w), 1196 (w), 1181 (m), 1125 (s), 1060 (m), 1025 (s), 960 (m), 914 (m), 856 (m), 825 (s), 746 (m), 712 (m), 675 (m), 647 (m).

# Copies of $^1\text{H}$ and $^{13}\text{C}$ NMR spectra for compounds 3, 4, 5, 6, 7 and 8

Kiamehr, 94-KM,  $\text{CDCl}_3$ ,  $^1\text{H}$

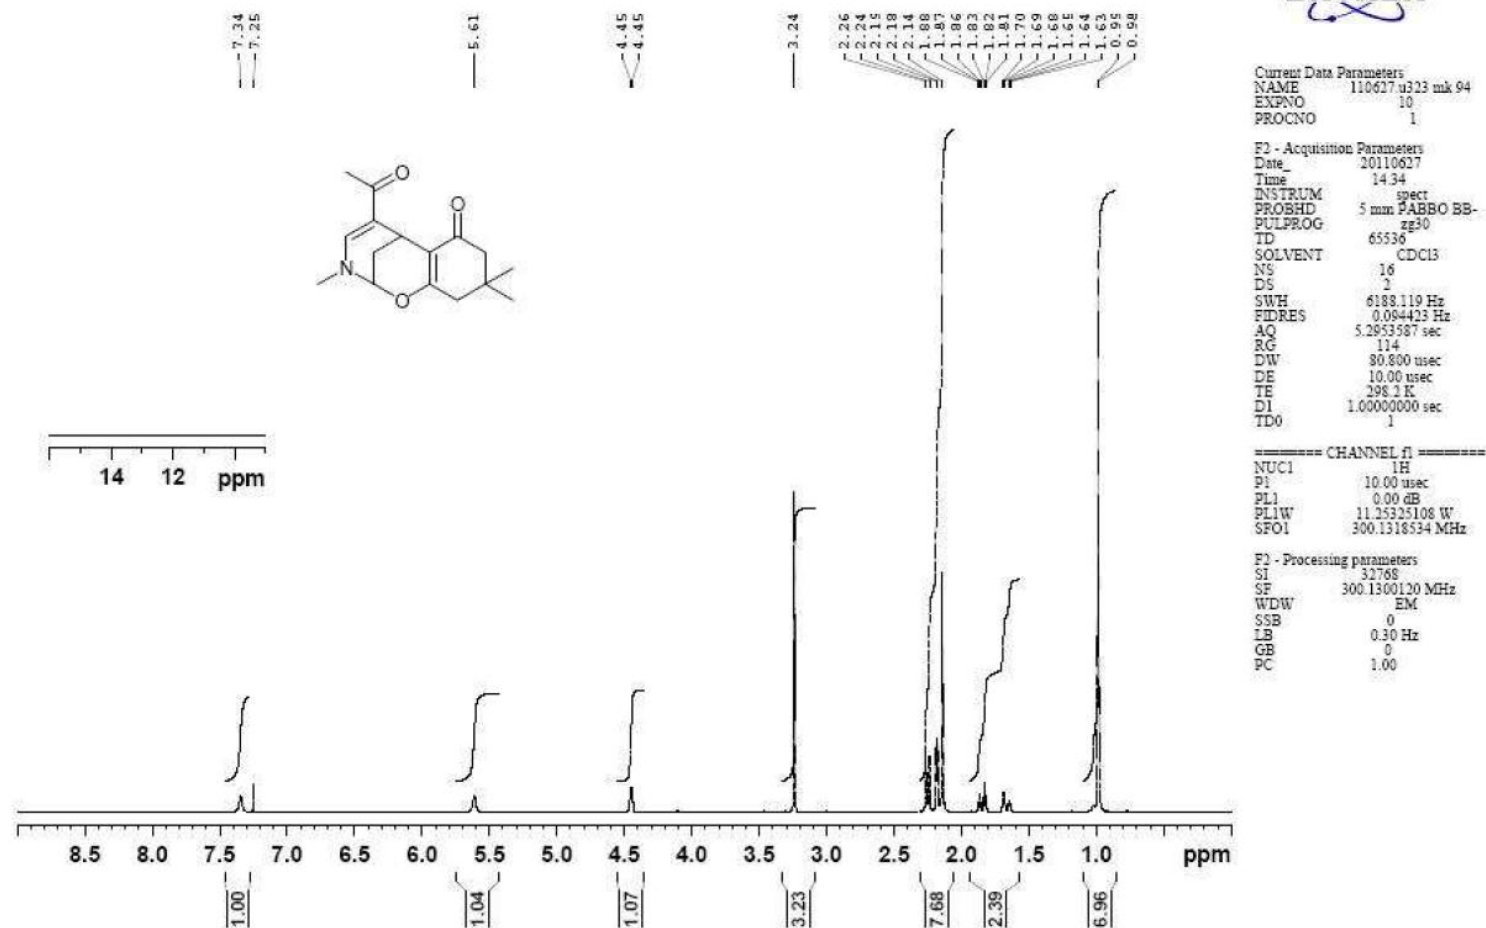

$^1\text{H}$  NMR spectra for compound 3a

Kiamehr KM-94 13C CDC13

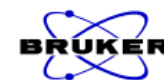

Current Data Parameters  
 NAME 110524.203 mk 94 C  
 EXPNO 10  
 PROCNO 1

F2 - Acquisition Parameters  
 Date\_ 20110524  
 Time 18.46  
 INSTRUM spect  
 PROBHD 5 mm PABBO BB-  
 PULPROG zgpg30  
 TD 65536  
 SOLVENT CDC13  
 NS 1200  
 DS 4  
 SWH 15000.000 Hz  
 FIDRES 0.228882 Hz  
 AQ 2.1845834 sec  
 RG 2050  
 DW 33.333 usec  
 DE 10.00 usec  
 TE 299.7 K  
 D1 2.00000000 sec  
 d11 0.03000000 sec  
 DELTA 1.89999998 sec  
 TD0 1

===== CHANNEL f1 =====  
 NUC1 13C  
 P1 10.00 usec  
 PL1 -1.00 dB  
 SFO1 62.9015280 MHz

===== CHANNEL f2 =====  
 CPDPRG2 waltz16  
 NUC2 1H  
 PCPD2 70.00 usec  
 PL12 15.00 dB  
 PL13 15.00 dB  
 PL2 -2.50 dB  
 SFO2 250.1310005 MHz

F2 - Processing parameters  
 SI 32768  
 SF 62.8952397 MHz  
 WDW EM  
 SSB 0  
 LB 1.00 Hz  
 GB 0  
 PC 1.40

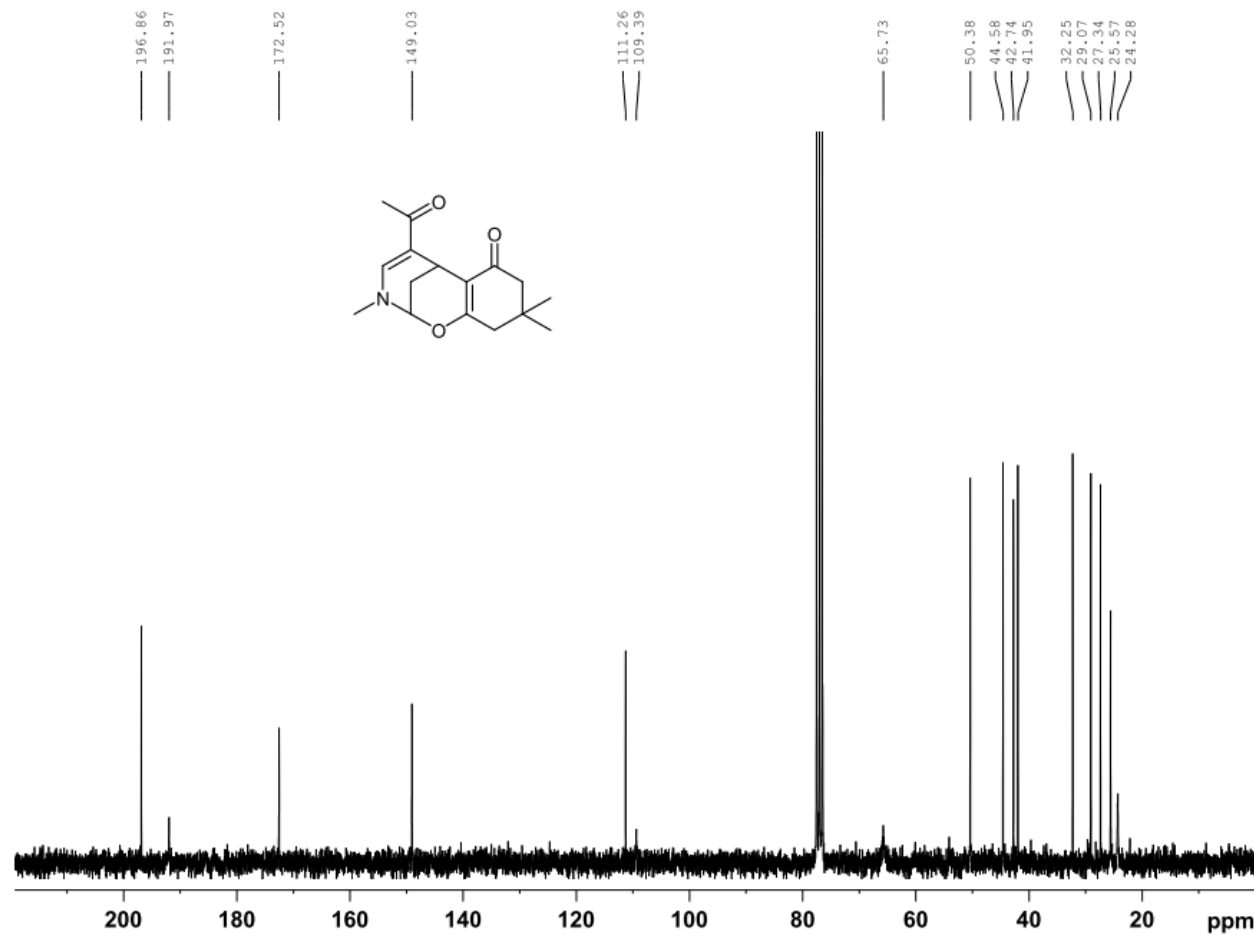

<sup>13</sup>C NMR spectra for compound 3a

Kaimehr, K-68, CDCl<sub>3</sub>, 1H

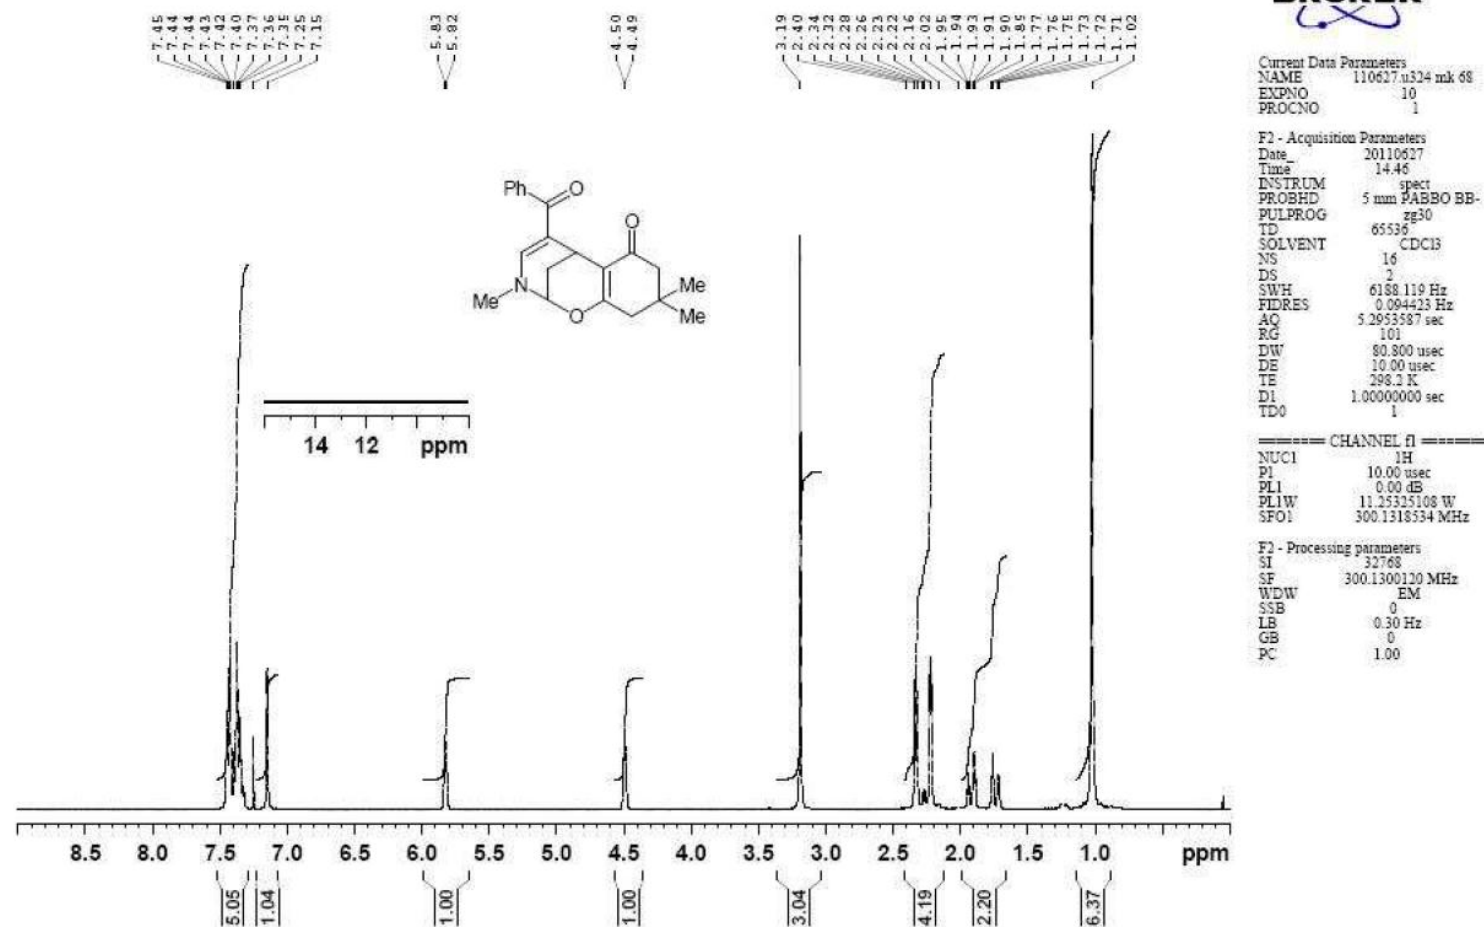

<sup>1</sup>H NMR spectra for compound 3b

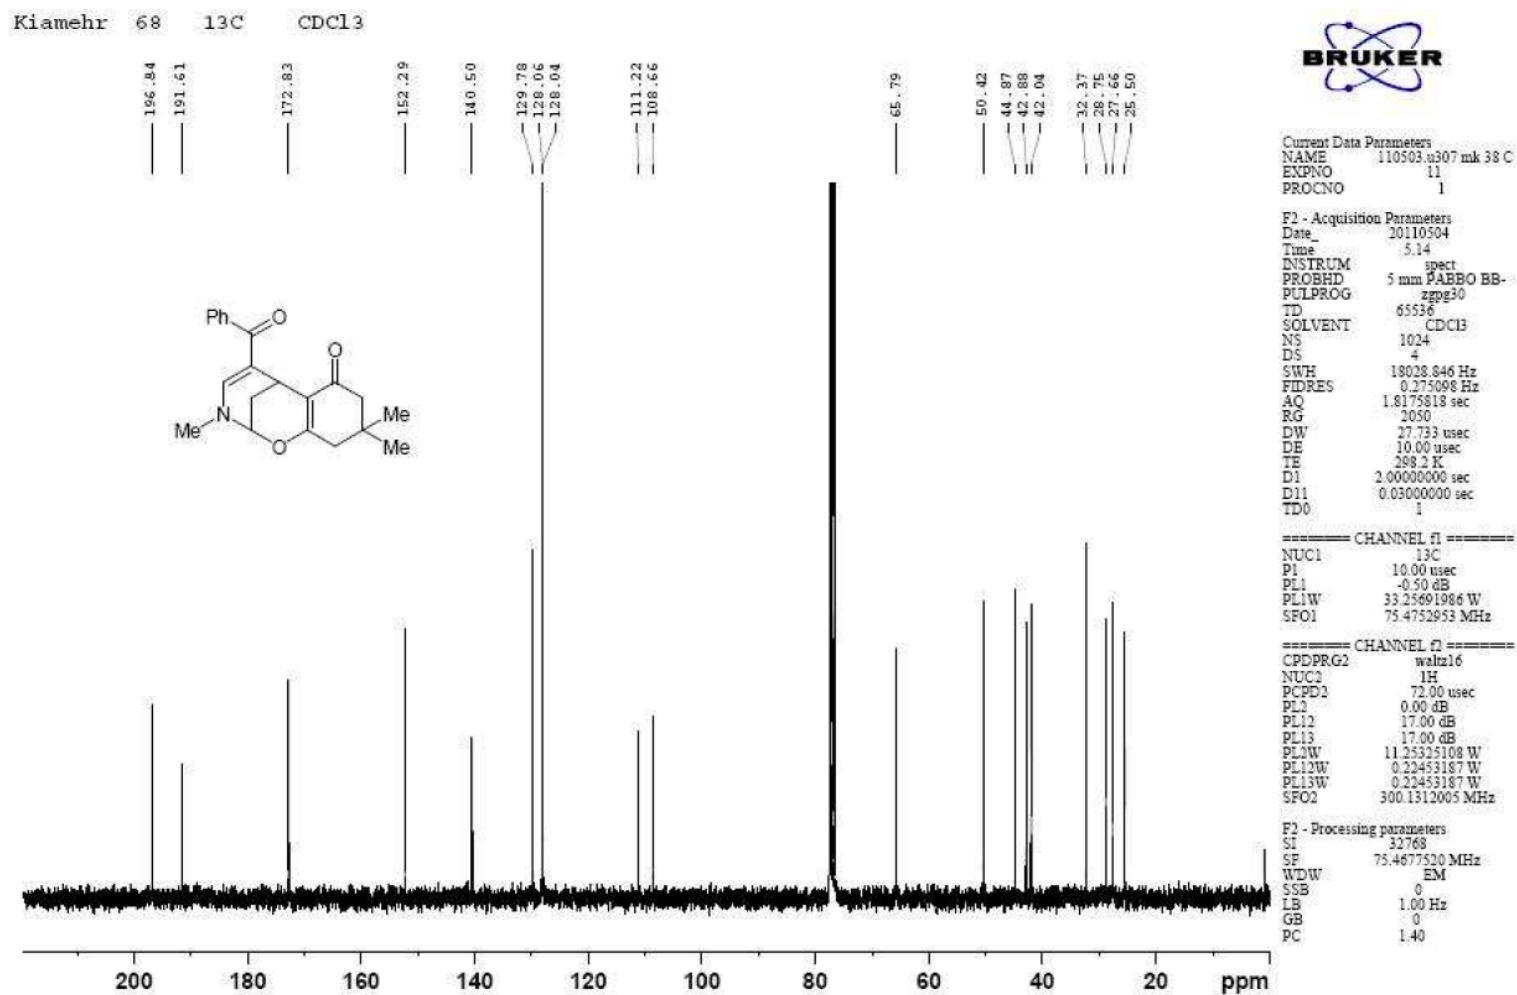

$^{13}\text{C}$  NMR spectra for compound 3b

Kiamehr, KM-111, CDCl<sub>3</sub>, 1H

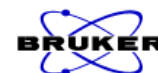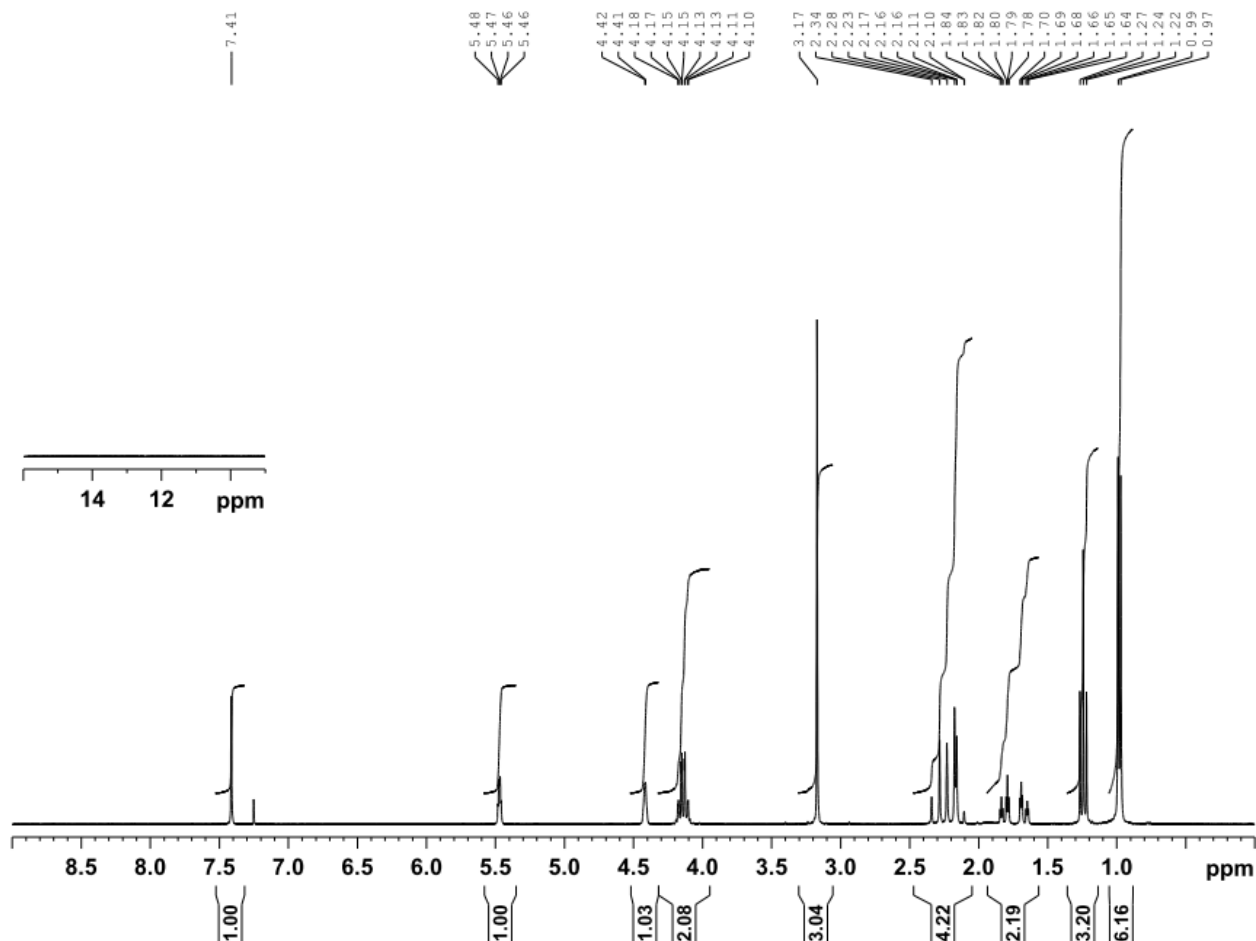

Current Data Parameters  
NAME 110701.u307 mk 111  
EXPNO 10  
PROCNO 1

F2 - Acquisition Parameters  
Date\_ 20110701  
Time 8.57  
INSTRUM spect  
PROBHD 5 mm PABBO BB-  
PULPROG zg30  
TD 65536  
SOLVENT CDCl<sub>3</sub>  
NS 16  
DS 2  
SWH 6188.119 Hz  
FIDRES 0.094423 Hz  
AQ 5.2953587 sec  
RG 80.6  
DW 80.800 usec  
DE 10.00 usec  
TE 298.2 K  
D1 1.00000000 sec  
TD0 1

===== CHANNEL f1 =====  
NUC1 1H  
P1 10.00 usec  
PL1 0.00 dB  
PL1W 11.25325108 W  
SFO1 300.1318534 MHz

F2 - Processing parameters  
SI 32768  
SF 300.1300120 MHz  
WDW EM  
SSB 0  
LB 0.30 Hz  
GB 0  
PC 1.00

<sup>1</sup>H NMR spectra for compound 3c



Kiamehr, KM-111, CDCl<sub>3</sub>, 13C

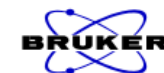

Current Data Parameters  
 NAME 110701.u307 mk 111  
 EXPNO 11  
 PROCNO 1

F2 - Acquisition Parameters  
 Date 20110703  
 Time 17.30  
 INSTRUM spect  
 PROBHD 5 mm PABBO BB-  
 PULPROG zgpg30  
 TD 65536  
 SOLVENT CDCl<sub>3</sub>  
 NS 1024  
 DS 4  
 SWH 18028.846 Hz  
 FIDRES 0.275098 Hz  
 AQ 1.8175818 sec  
 RG 2050  
 DW 27.733 usec  
 DE 10.00 usec  
 TE 298.2 K  
 D1 2.00000000 sec  
 D11 0.03000000 sec  
 TD0 1

CHANNEL f1  
 NUC1 13C  
 P1 10.00 usec  
 PL1 -0.50 dB  
 PL1W 33.25691986 W  
 SFO1 75.4752953 MHz

CHANNEL f2  
 CPDPRG2 waltz16  
 NUC2 1H  
 PCPD2 72.00 usec  
 PL2 0.00 dB  
 PL12 17.00 dB  
 PL13 17.00 dB  
 PL2W 11.25325108 W  
 PL12W 0.22453187 W  
 PL13W 0.22453187 W  
 SFO2 300.1312005 MHz

F2 - Processing parameters  
 SI 32768  
 SF 75.4677536 MHz  
 WDW EM  
 SSB 0  
 LB 1.00 Hz  
 GB 0  
 PC 1.40

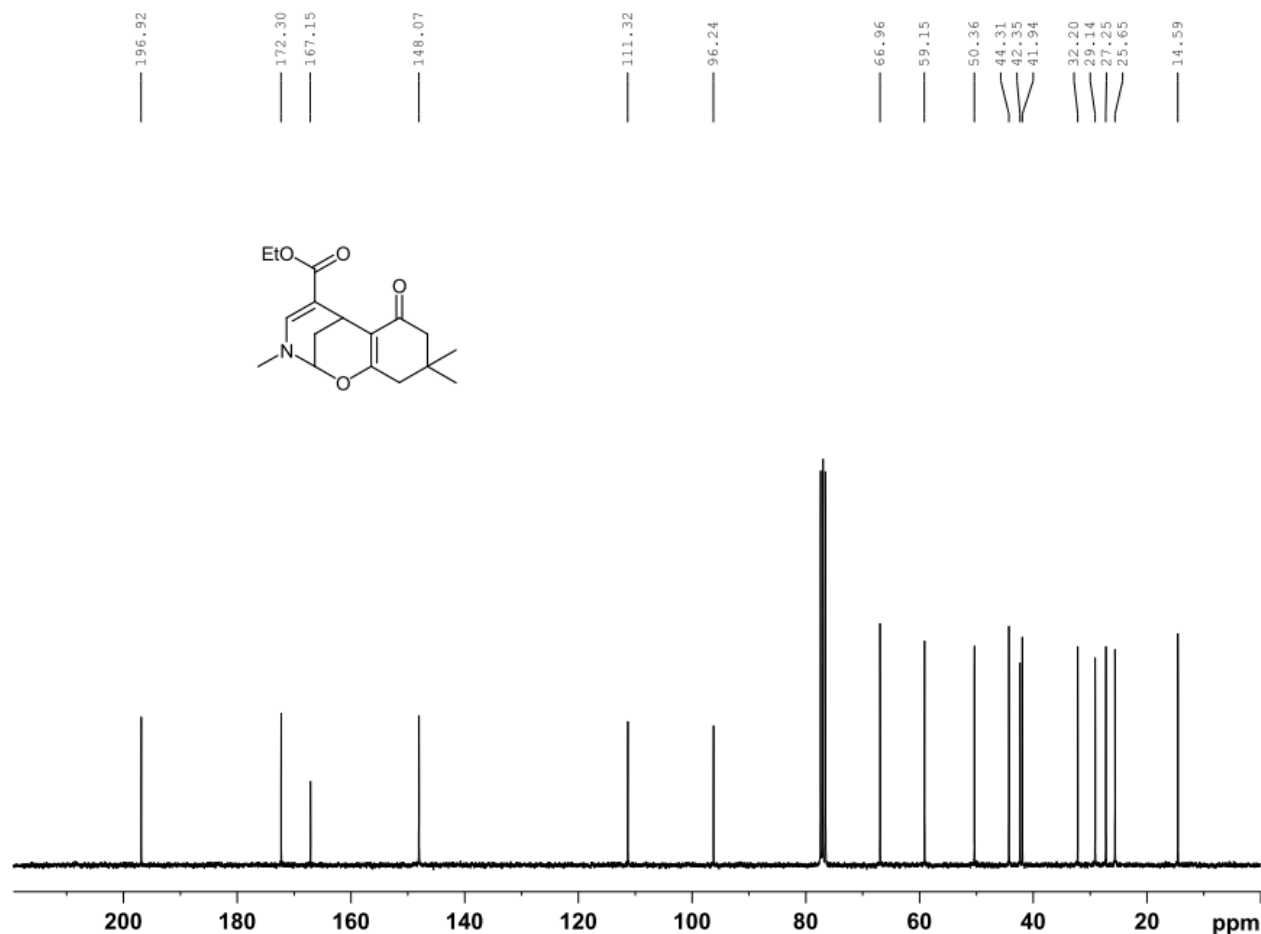

<sup>13</sup>C NMR spectra for compound 3c

Kiamehr KM-33 1H CDCl3

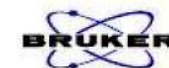

Current Data Parameters  
NAME 110302.us01 mk 33  
EXPNO 10  
PROCNO 1

F2 - Acquisition Parameters  
Date\_ 20110302  
Time 8.48  
INSTRUM spect  
PROBHD 5 mm PABBO BB-  
PULPROG zg30  
TD 65536  
SOLVENT CDCl3  
NS 16  
DS 2  
SWH 6188.119 Hz  
FIDRES 0.094423 Hz  
AQ 5.2953587 sec  
RG 128  
DW 80.800 usec  
DE 10.00 usec  
TE 296.3 K  
D1 1.00000000 sec  
TD0 1

===== CHANNEL f1 =====  
NUC1 1H  
P1 10.00 usec  
PL1 0.00 dB  
PL1W 11.25325108 W  
SFO1 300.1318534 MHz

F2 - Processing parameters  
SI 32768  
SF 300.1300111 MHz  
WDW EM  
SSB 0  
LB 0.30 Hz  
GB 0  
PC 1.00

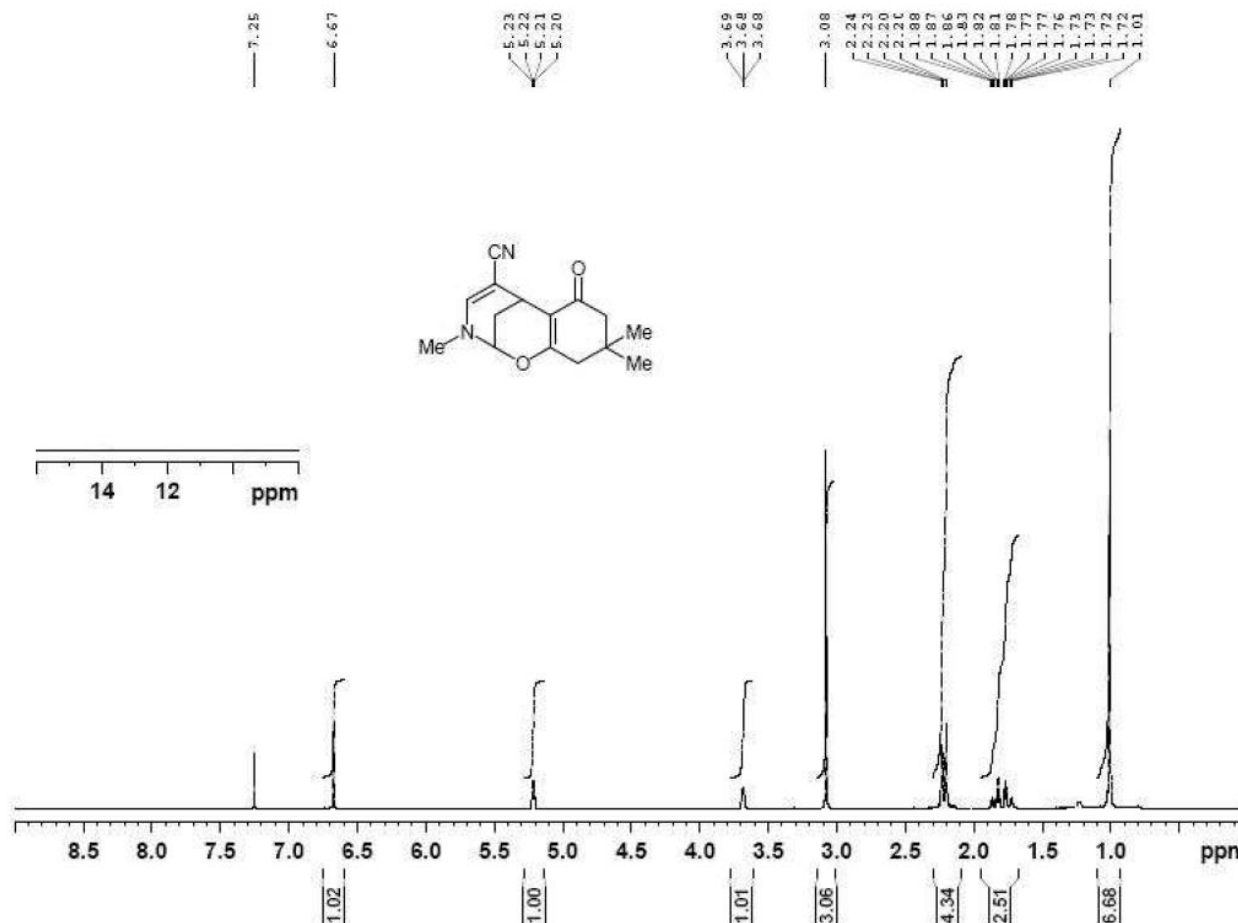

<sup>1</sup>H NMR spectra for compound 3d

Kiamehr KM-33 13C CDCl3

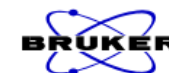

Current Data Parameters  
 NAME 110303.209 mk 33 C  
 EXPNO 10  
 PROCNO 1

F2 - Acquisition Parameters  
 Date 20110303  
 Time 22.28  
 INSTRUM spect  
 PROBHD 5 mm PABBO BB-  
 PULPROG zgpg30  
 TD 65536  
 SOLVENT CDCl3  
 NS 1024  
 DS 4  
 SWH 15000.000 Hz  
 FIDRES 0.228882 Hz  
 AQ 2.1845834 sec  
 RG 2050  
 DW 33.333 usec  
 DE 10.00 usec  
 TE 298.0 K  
 D1 2.00000000 sec  
 d11 0.03000000 sec  
 DELTA 1.89999998 sec  
 TD0 1

===== CHANNEL f1 =====  
 NUC1 13C  
 P1 10.00 usec  
 PL1 -1.00 dB  
 SFO1 62.9015280 MHz

===== CHANNEL f2 =====  
 CPDPRG2 waltz16  
 NUC2 1H  
 PCPD2 70.00 usec  
 PL12 15.00 dB  
 PL13 15.00 dB  
 PL2 -2.50 dB  
 SFO2 250.1310005 MHz

F2 - Processing parameters  
 SI 32768  
 SF 62.8952409 MHz  
 WDW EM  
 SSB 0  
 LB 1.00 Hz  
 GB 0  
 PC 1.40

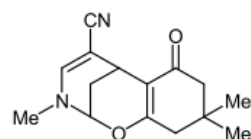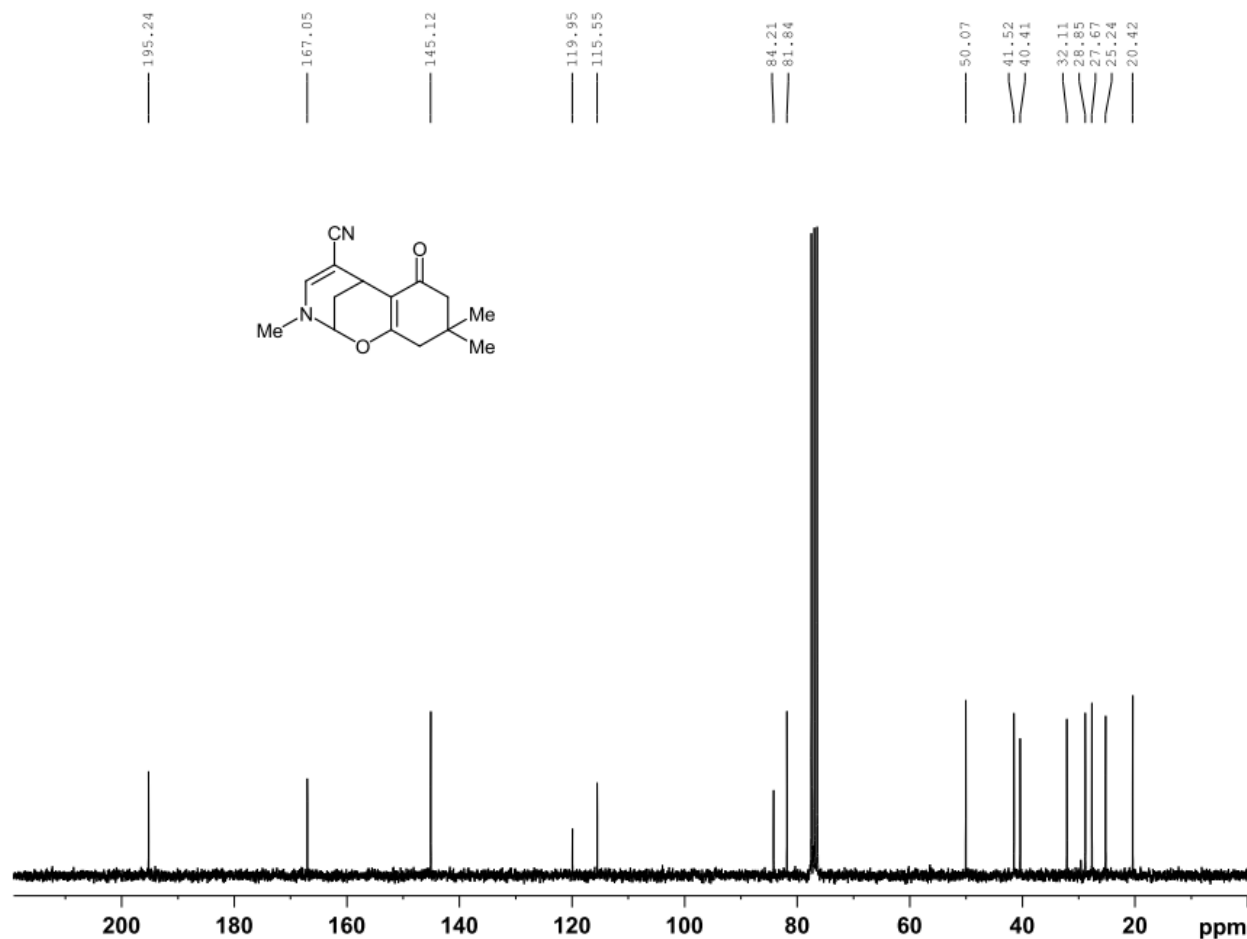

<sup>13</sup>C NMR spectra for compound 3d

Kiamehr 23 1H CDCl3

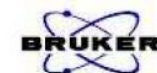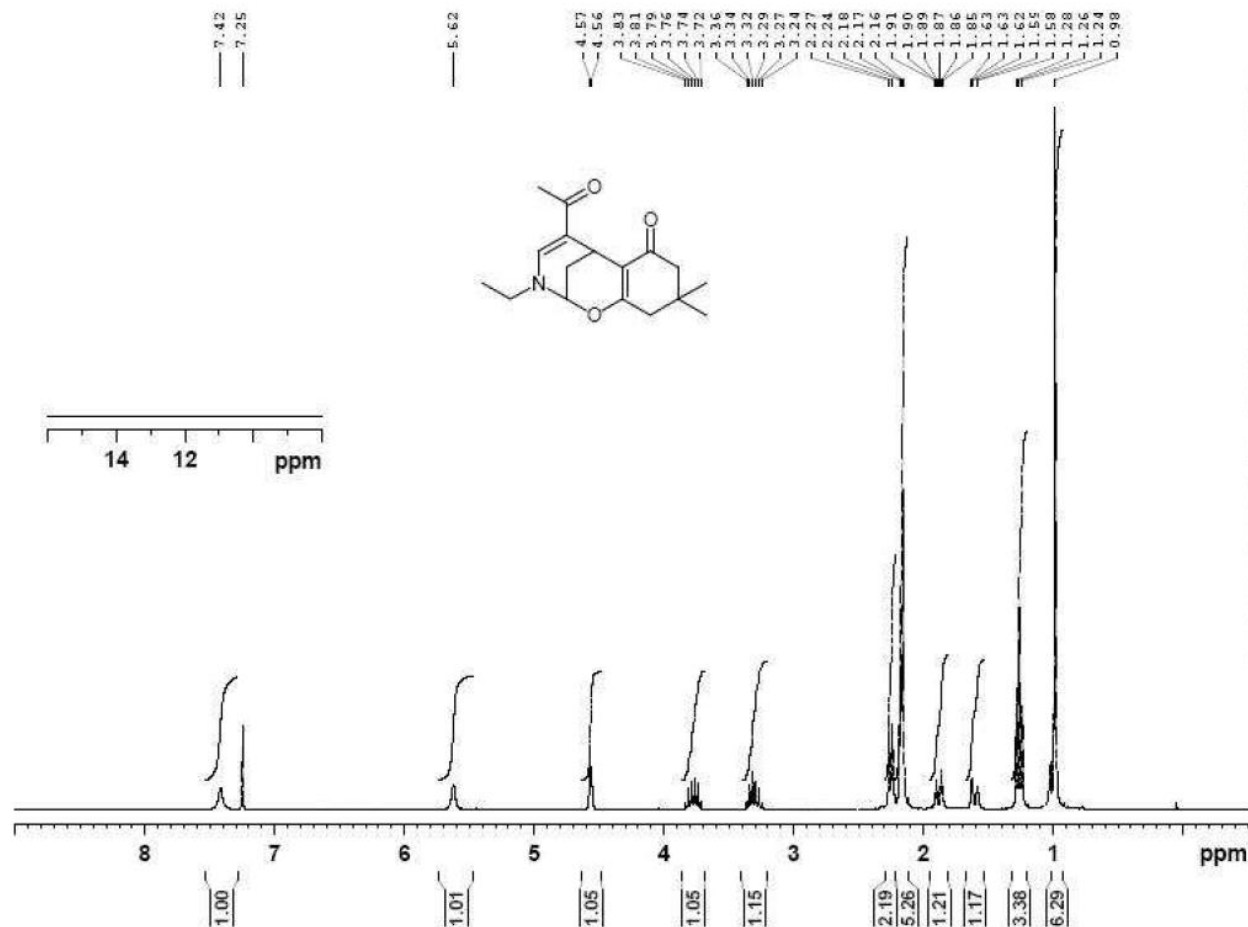

Current Data Parameters  
NAME 110303.u341 mk 23  
EXPNO 10  
PROCNO 1

F2 - Acquisition Parameters  
Date\_ 20110303  
Time 15.01  
INSTRUM spect  
PROBHD 5 mm PABBO BB-  
PULPROG zg30  
TD 65536  
SOLVENT CDCl3  
NS 16  
DS 2  
SWH 6188.119 Hz  
FIDRES 0.094423 Hz  
AQ 5.2953587 sec  
RG 128  
DW 80.800 usec  
DE 10.00 usec  
TE 298.2 K  
D1 1.00000000 sec  
TD0 1

===== CHANNEL f1 =====  
NUC1 1H  
P1 10.00 usec  
PL1 0.00 dB  
PL1W 11.25325108 W  
SFO1 300.1318534 MHz

F2 - Processing parameters  
SI 32768  
SF 300.1300115 MHz  
WDW EM  
SSB 0  
LB 0.30 Hz  
GB 0  
PC 1.00

<sup>1</sup>H NMR spectra for compound 3e

Kiamehr 23 13C CDCl3

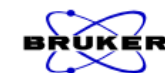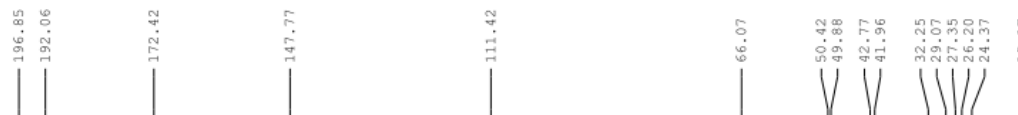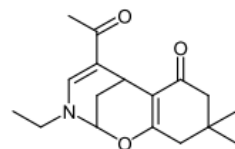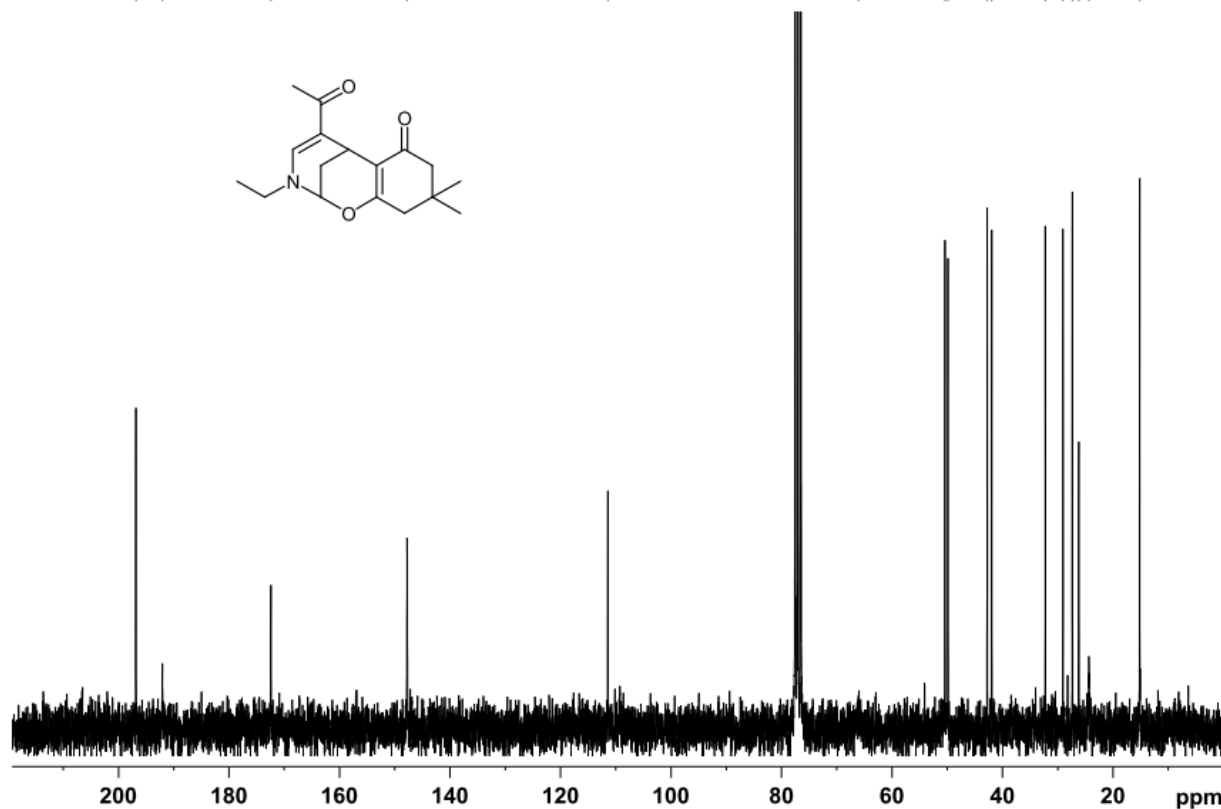

Current Data Parameters  
 NAME 110304.215 mk 23 C  
 EXPNO 10  
 PROCNO 1

F2 - Acquisition Parameters  
 Date\_ 20110305  
 Time 15.20  
 INSTRUM spect  
 PROBHD 5 mm PABBO BB-  
 PULPROG zgpg30  
 TD 65536  
 SOLVENT CDCl3  
 NS 1024  
 DS 4  
 SWH 15000.000 Hz  
 FIDRES 0.228882 Hz  
 AQ 2.1845834 sec  
 RG 2050  
 DW 33.333 usec  
 DE 10.00 usec  
 TE 298.3 K  
 D1 2.00000000 sec  
 d11 0.03000000 sec  
 DELTA 1.89999998 sec  
 TD0 1

===== CHANNEL f1 =====  
 NUC1 13C  
 P1 10.00 usec  
 PL1 -1.00 dB  
 SFO1 62.9015280 MHz

===== CHANNEL f2 =====  
 CPDPRG2 waltz16  
 NUC2 1H  
 PCPD2 70.00 usec  
 PL12 15.00 dB  
 PL13 15.00 dB  
 PL2 -2.50 dB  
 SFO2 250.1310005 MHz

F2 - Processing parameters  
 SI 32768  
 SF 62.8952393 MHz  
 WDW EM  
 SSB 0  
 LB 1.00 Hz  
 GB 0  
 PC 1.40

<sup>13</sup>C NMR spectra for compound 3e

Kiamehr KM-89 1H CDCl3

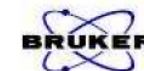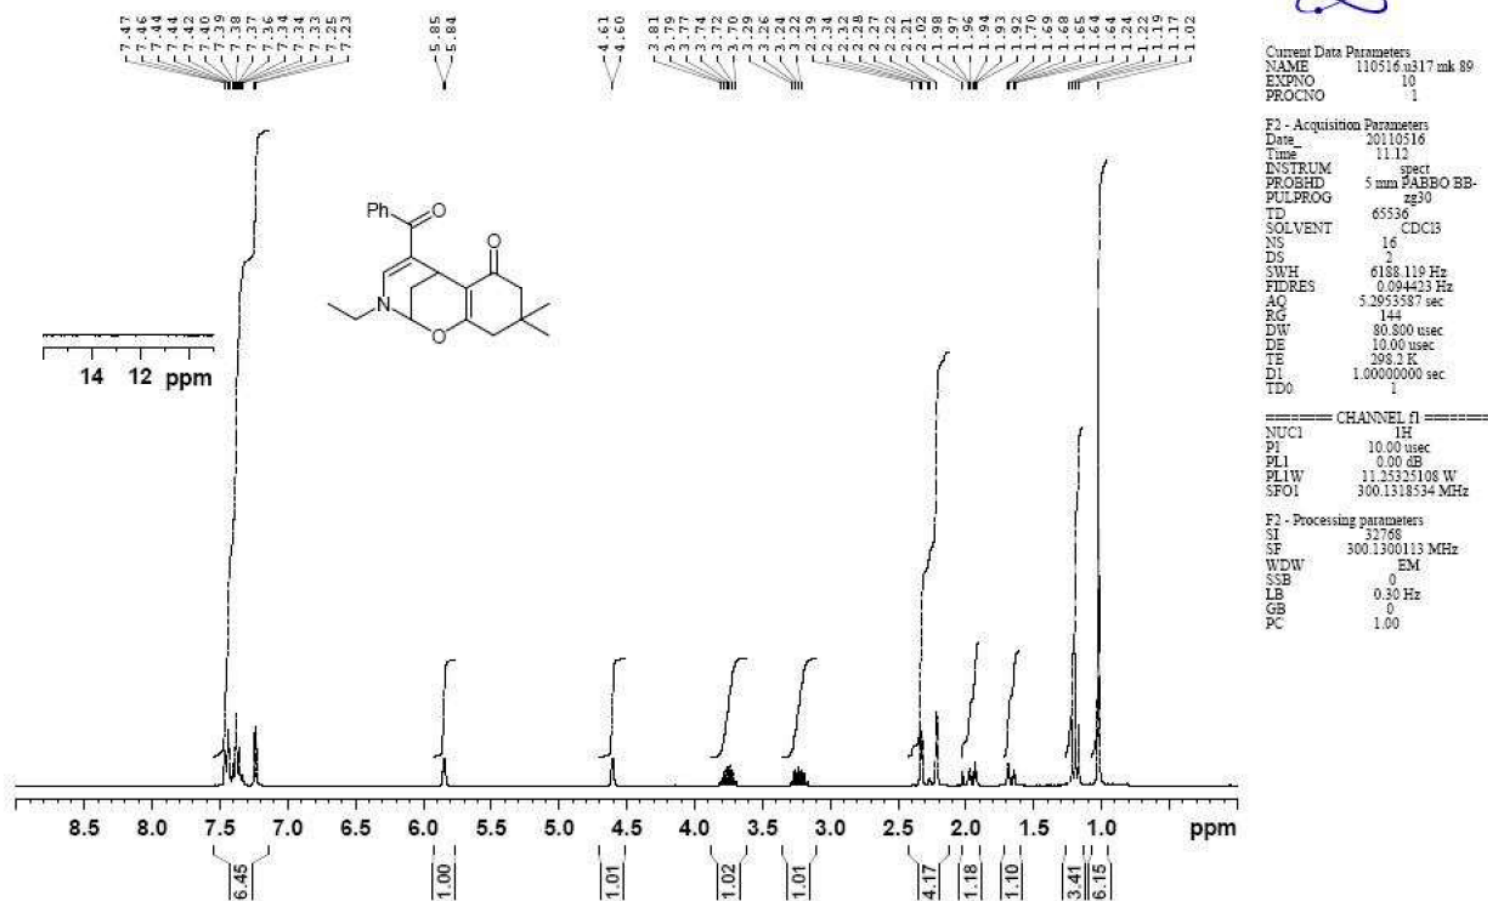

<sup>1</sup>H NMR spectra for compound 3f

Kiamehr KM-89 13C CDC13

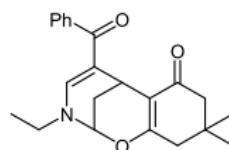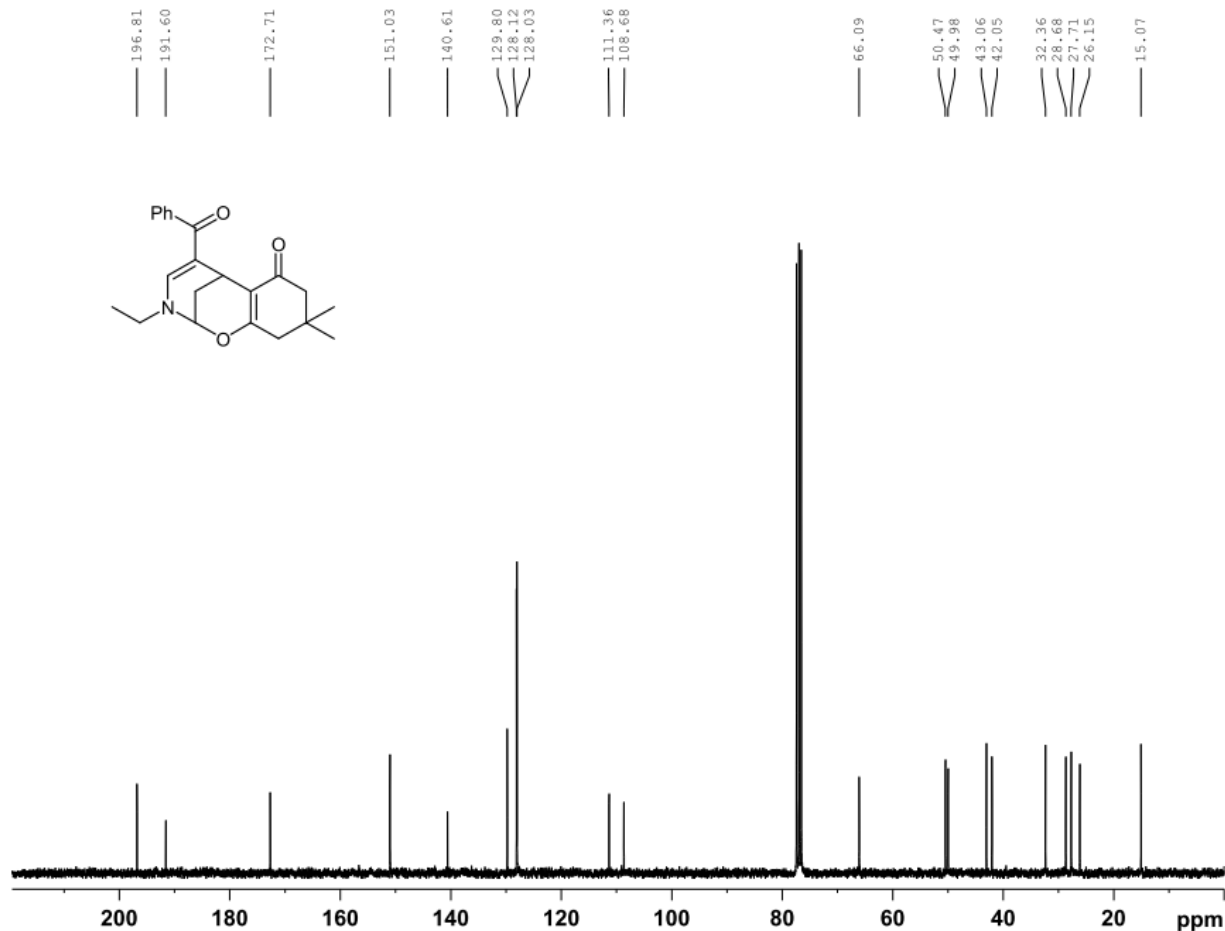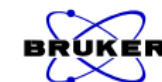

Current Data Parameters  
NAME 110516.u317 mk 89  
EXPNO 11  
PROCNO 1

F2 - Acquisition Parameters  
Date\_ 20110517  
Time 0.56  
INSTRUM spect  
PROBHD 5 mm PABBO BB-  
PULPROG zgpg30  
TD 65536  
SOLVENT CDC13  
NS 1024  
DS 4  
SWH 18028.846 Hz  
FIDRES 0.275098 Hz  
AQ 1.8175818 sec  
RG 2050  
DW 27.733 usec  
DE 10.00 usec  
TE 298.3 K  
D1 2.00000000 sec  
D11 0.03000000 sec  
TD0 1

===== CHANNEL f1 =====  
NUC1 13C  
P1 10.00 usec  
PL1 -0.50 dB  
PL1W 33.25691986 W  
SFO1 75.4752953 MHz

===== CHANNEL f2 =====  
CPDPRG2 waltz16  
NUC2 1H  
PCPD2 72.00 usec  
PL2 0.00 dB  
PL12 17.00 dB  
PL13 17.00 dB  
PL2W 11.25325108 W  
PL12W 0.22453187 W  
PL13W 0.22453187 W  
SFO2 300.1312005 MHz

F2 - Processing parameters  
SI 32768  
SF 75.4677514 MHz  
WDW EM  
SSB 0  
LB 1.00 Hz  
GB 0  
PC 1.40

<sup>13</sup>C NMR spectra for compound 3f

Kiamehr, 31-KM, CDCl<sub>3</sub>, 1H

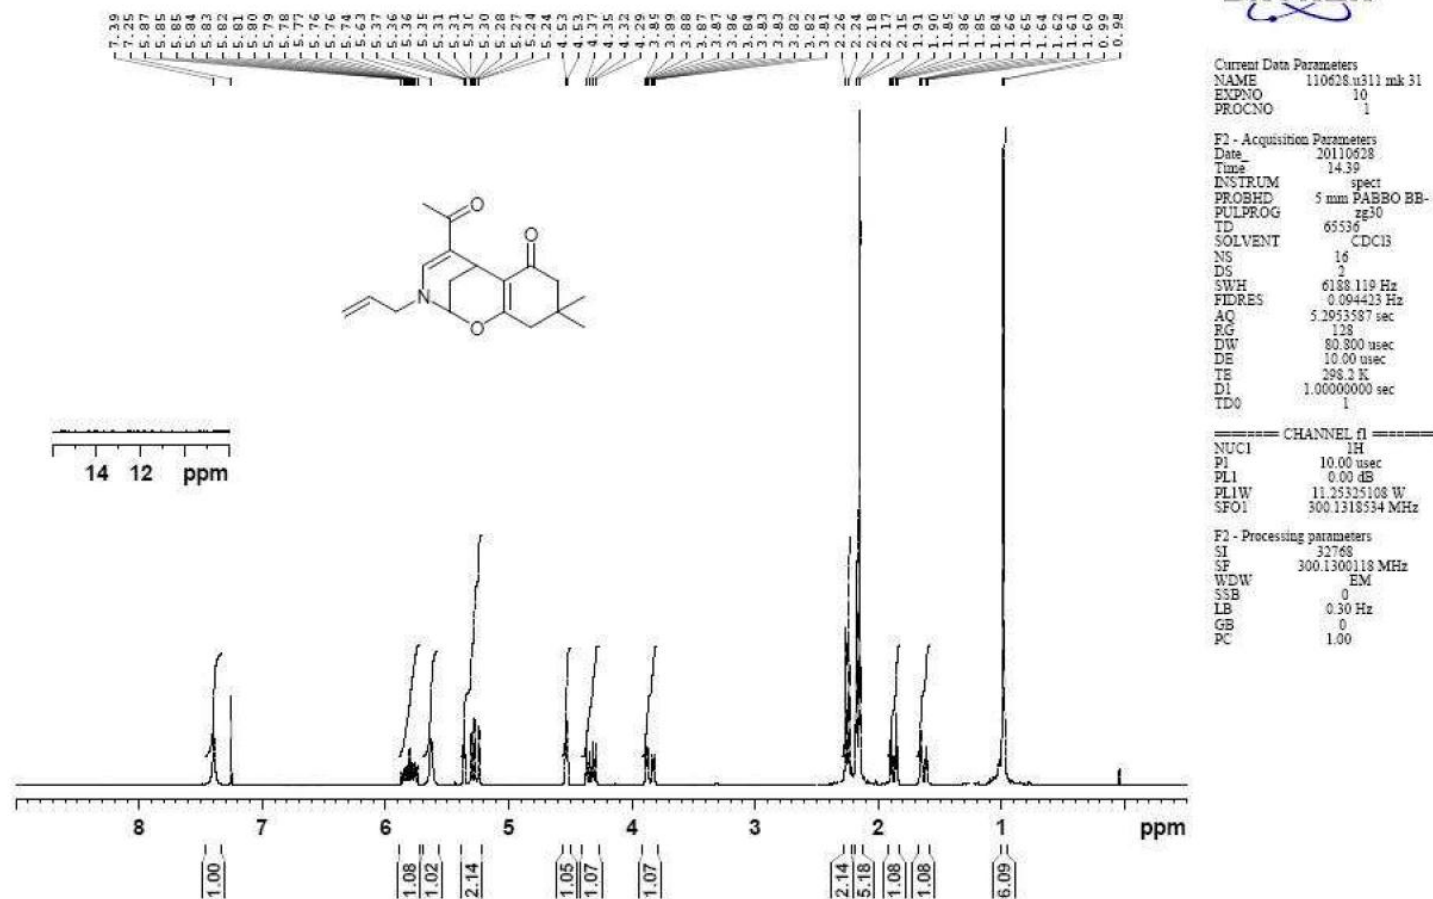

<sup>1</sup>H NMR spectra for compound 3g



Kiamehr, 31-KM, CDCl<sub>3</sub>, <sup>13</sup>C

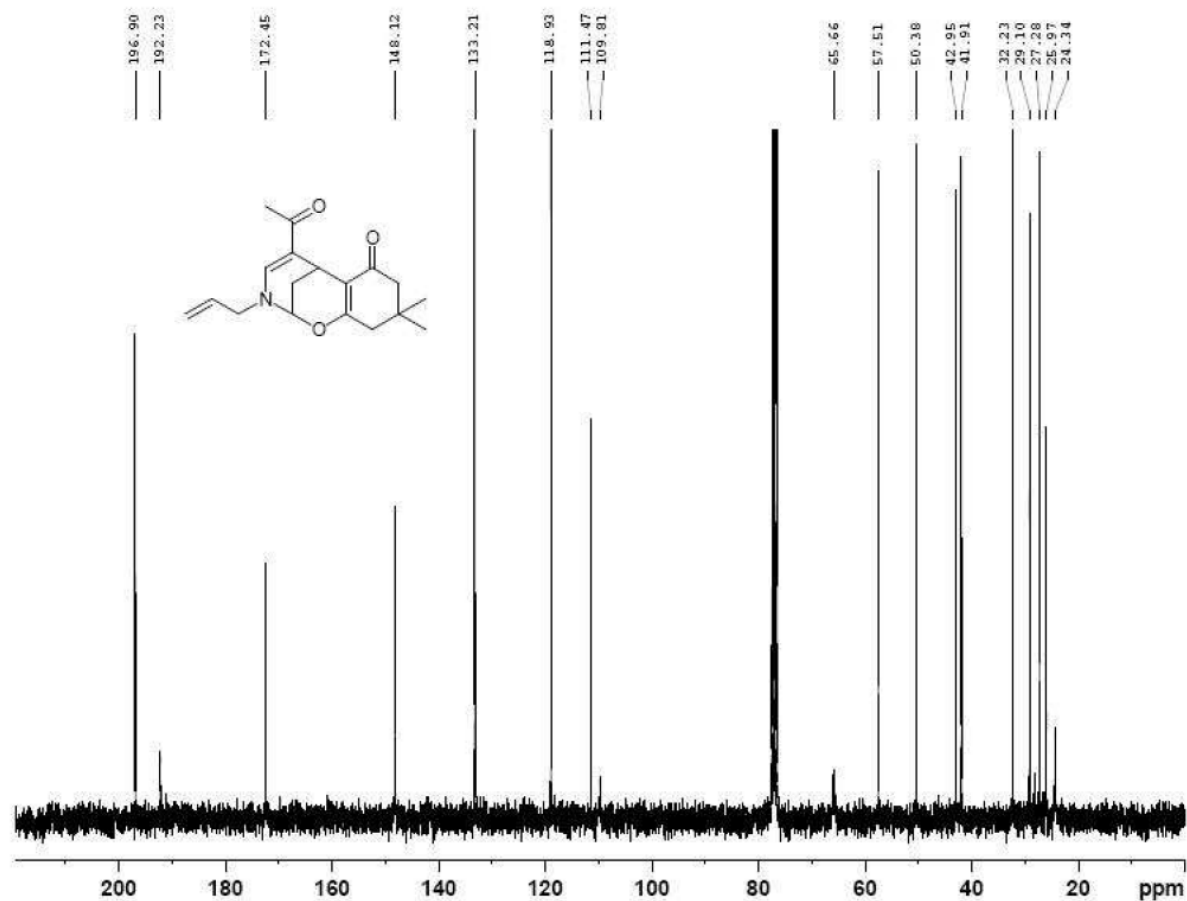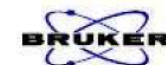

Current Data Parameters  
NAME 110639 u328 mk 31 C  
EXPNO 10  
PROCNO 1

F1 - Acquisition Parameters  
Date\_ 20110630  
Time 2.15  
INSTRUM spect  
PROBHD 5 mm PABBO BB-  
PULPROG zgpg30  
TD 65536  
SOLVENT CDCl3  
NS 1024  
DS 4  
SWH 18028.846 Hz  
FIDRES 0.275098 Hz  
AQ 1.8175818 sec  
RG 2050  
DW 27.733 usec  
DE 10.00 usec  
TE 298.8 K  
D1 2.00000000 sec  
D11 0.03000000 sec  
TD0 1

===== CHANNEL f1 =====  
NUC1 <sup>13</sup>C  
P1 10.00 usec  
PL1 -0.50 dB  
PL1W 33.25601986 W  
SFO1 75.4752953 MHz

===== CHANNEL f2 =====  
CPDPRG2 waltz16  
NUC2 <sup>1</sup>H  
PCPD2 72.00 usec  
PL2 0.00 dB  
PL12 17.00 dB  
PL13 17.00 dB  
PL3W 11.25325108 W  
PL12W 0.22453187 W  
PL13W 0.22453187 W  
SFO2 300.1312005 MHz

F2 - Processing parameters  
SI 32768  
SF 75.4677525 MHz  
WDW EM  
SSB 0  
LB 1.00 Hz  
GB 0  
PC 1.40

<sup>13</sup>C NMR spectra for compound 3g

Kiamehr, 84-KM, CDCl<sub>3</sub>, 1H

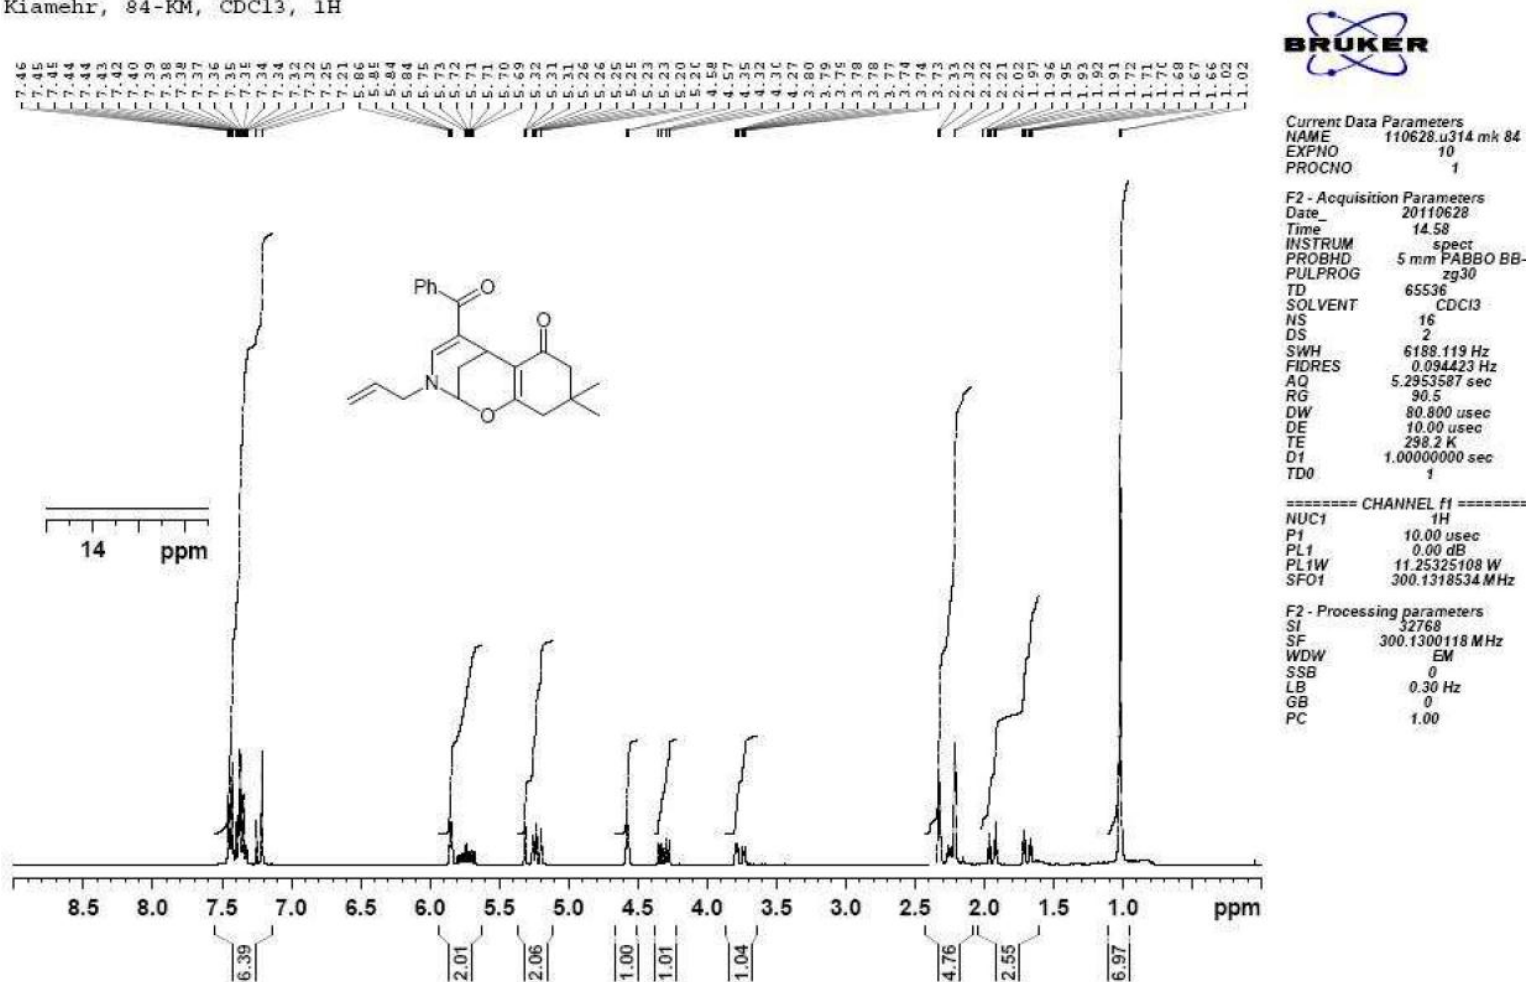

<sup>1</sup>H NMR spectra for compound 3h

Kiamehr, 84-KM, CDCl<sub>3</sub>, <sup>13</sup>C

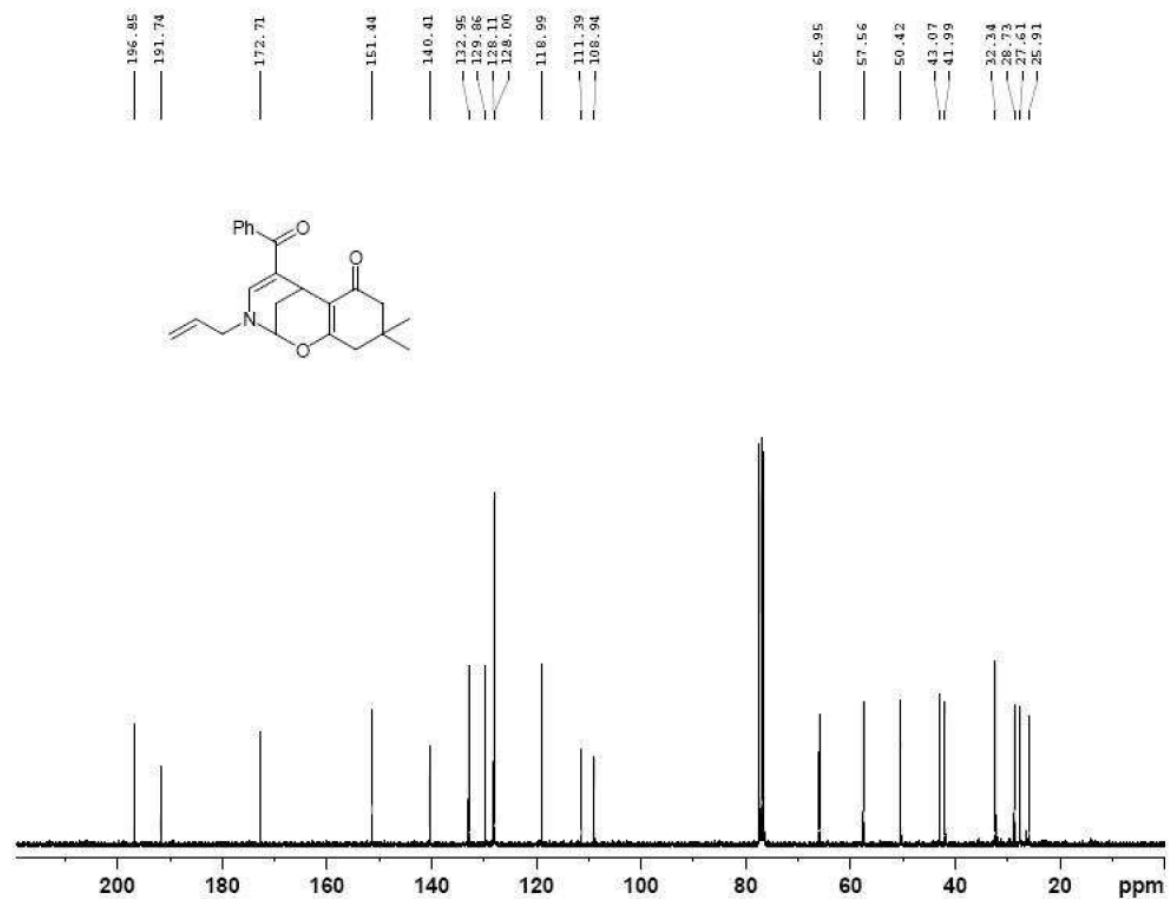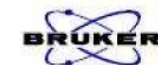

Current Data Parameters  
 NAME 110629 us329 mk 84 C  
 EXPNO 10  
 PROCNO 1

F2 - Acquisition Parameters  
 Date\_ 20110630  
 Time 3.44  
 INSTRUM spect  
 PROBHD 5 mm PABBO BB-  
 PULPROG zgpg30  
 TD 65536  
 SOLVENT CDCl<sub>3</sub>  
 NS 1024  
 DS 4  
 SWH 18028.846 Hz  
 FIDRES 0.275088 Hz  
 AQ 1.8175818 sec  
 RG 2050  
 DW 27.733 usec  
 DE 10.00 usec  
 TE 298.8 K  
 D1 2.00000000 sec  
 D11 0.03000000 sec  
 TD0 1

===== CHANNEL f1 =====  
 NUC1 <sup>13</sup>C  
 P1 10.00 usec  
 PL1 -0.50 dB  
 PL1W 33.25491986 W  
 SFO1 75.4752953 MHz

===== CHANNEL f2 =====  
 CPDPRG2 waltz16  
 NUC2 <sup>1</sup>H  
 PCPD2 72.00 usec  
 PL2 0.00 dB  
 PL12 17.00 dB  
 PL13 17.00 dB  
 PL2W 11.25325108 W  
 PL12W 0.22453187 W  
 PL13W 0.22453187 W  
 SFO2 300.1312005 MHz

F2 - Processing parameters  
 SI 32768  
 SF 75.4877536 MHz  
 WDW EM  
 SSB 0  
 LB 1.00 Hz  
 GB 0  
 PC 1.40

<sup>13</sup>C NMR spectra for compound 3h

Kiamehr 43 1H CDCl3

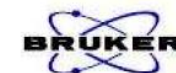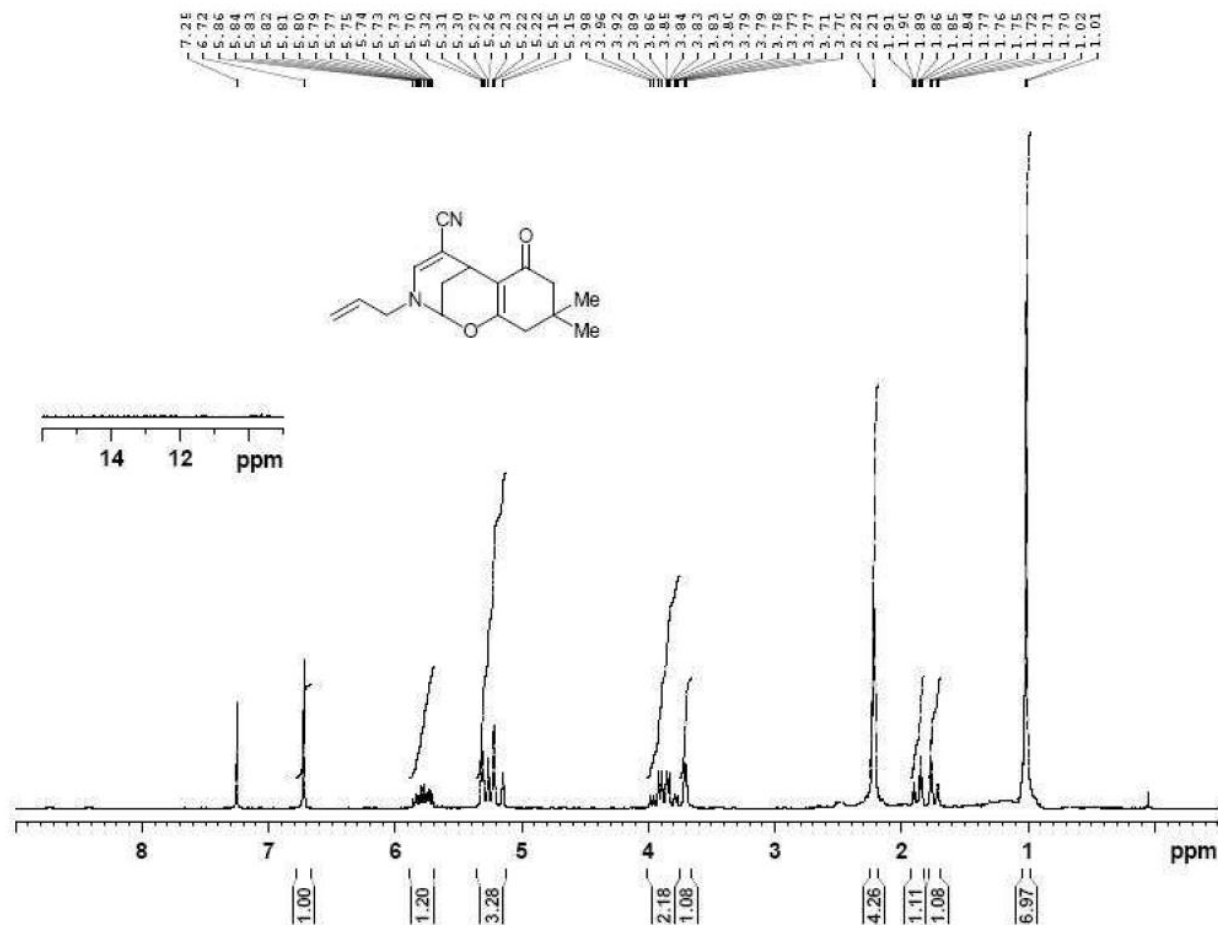

Current Data Parameters  
NAME 110408.204 mk 43  
EXPNO 10  
PROCNO 1

F2 - Acquisition Parameters  
Date\_ 20110408  
Time 9.07  
INSTRUM spect  
PROBHD 5 mm PABBO BB-  
PULPROG zg30  
TD 65536  
SOLVENT CDCl3  
NS 16  
DS 2  
SWH 5165.289 Hz  
FIDRES 0.078916 Hz  
AQ 6.3439550 sec  
RG 362  
DW 96.800 usec  
DE 10.00 usec  
TE 298.1 K  
D1 1.00000000 sec  
TD0 1

===== CHANNEL f1 =====  
NUC1 1H  
P1 10.00 usec  
PL1 -2.50 dB  
SFO1 250.1315447 MHz

F2 - Processing parameters  
SI 32768  
SF 250.1300030 MHz  
WDW EM  
SSB 0  
LB 0.30 Hz  
GB 0  
PC 1.00

<sup>1</sup>H NMR spectra for compound 3i

Kiamehr 43 13C CDCl3

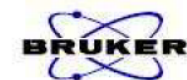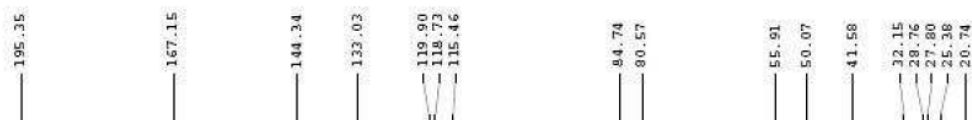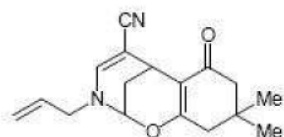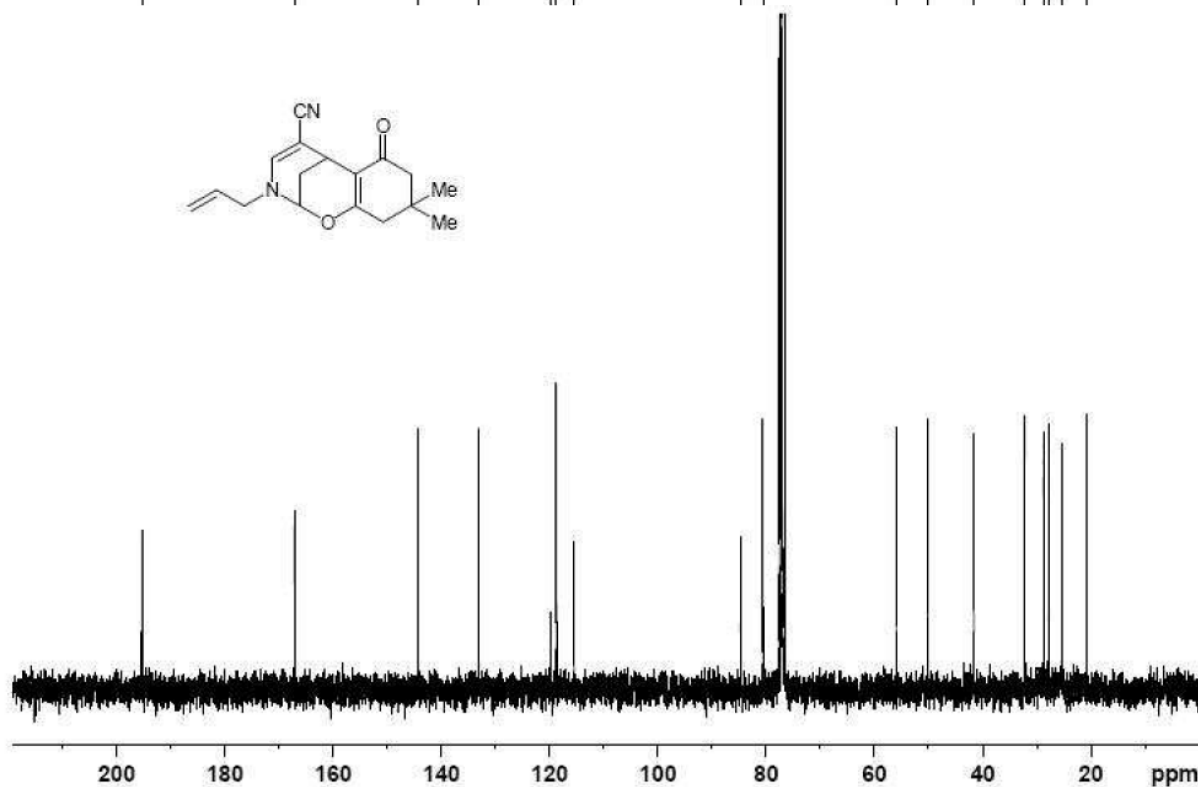

Current Data Parameters  
NAME 110411 204 mk 43 C  
EXPNO 10  
PROCNO 1

F2 - Acquisition Parameters  
Date\_ 20110411  
Time 19.47  
INSTRUM spect  
PROBHD 5 mm PABBO BB-  
PULPROG zgpg30  
TD 65536  
SOLVENT CDCl3  
NS 768  
DS 4  
SWH 15000.000 Hz  
FIDRES 0.228882 Hz  
AQ 1.1945834 sec  
RG 2050  
DW 33.333 usec  
DE 10.00 usec  
TE 298.3 K  
D1 2.00000000 sec  
d11 0.03000000 sec  
DELTA 1.89999998 sec  
TD0 1

===== CHANNEL f1 =====  
NUC1 13C  
P1 10.00 usec  
PL1 -1.00 dB  
SFO1 62.9015280 MHz

===== CHANNEL f2 =====  
CPDPRG2 waltz16  
NUC2 1H  
PCPD2 70.00 usec  
PL12 15.00 dB  
PL13 15.00 dB  
PL2 -2.50 dB  
SFO2 250.1310005 MHz

F2 - Processing parameters  
SI 32768  
SF 62.8952398 MHz  
WDW EM  
SSB 0  
LB 1.00 Hz  
GB 0  
PC 1.40

<sup>13</sup>C NMR spectra for compound 3i

Kiamehr,96-KM, CDCl<sub>3</sub>, 1H

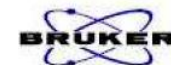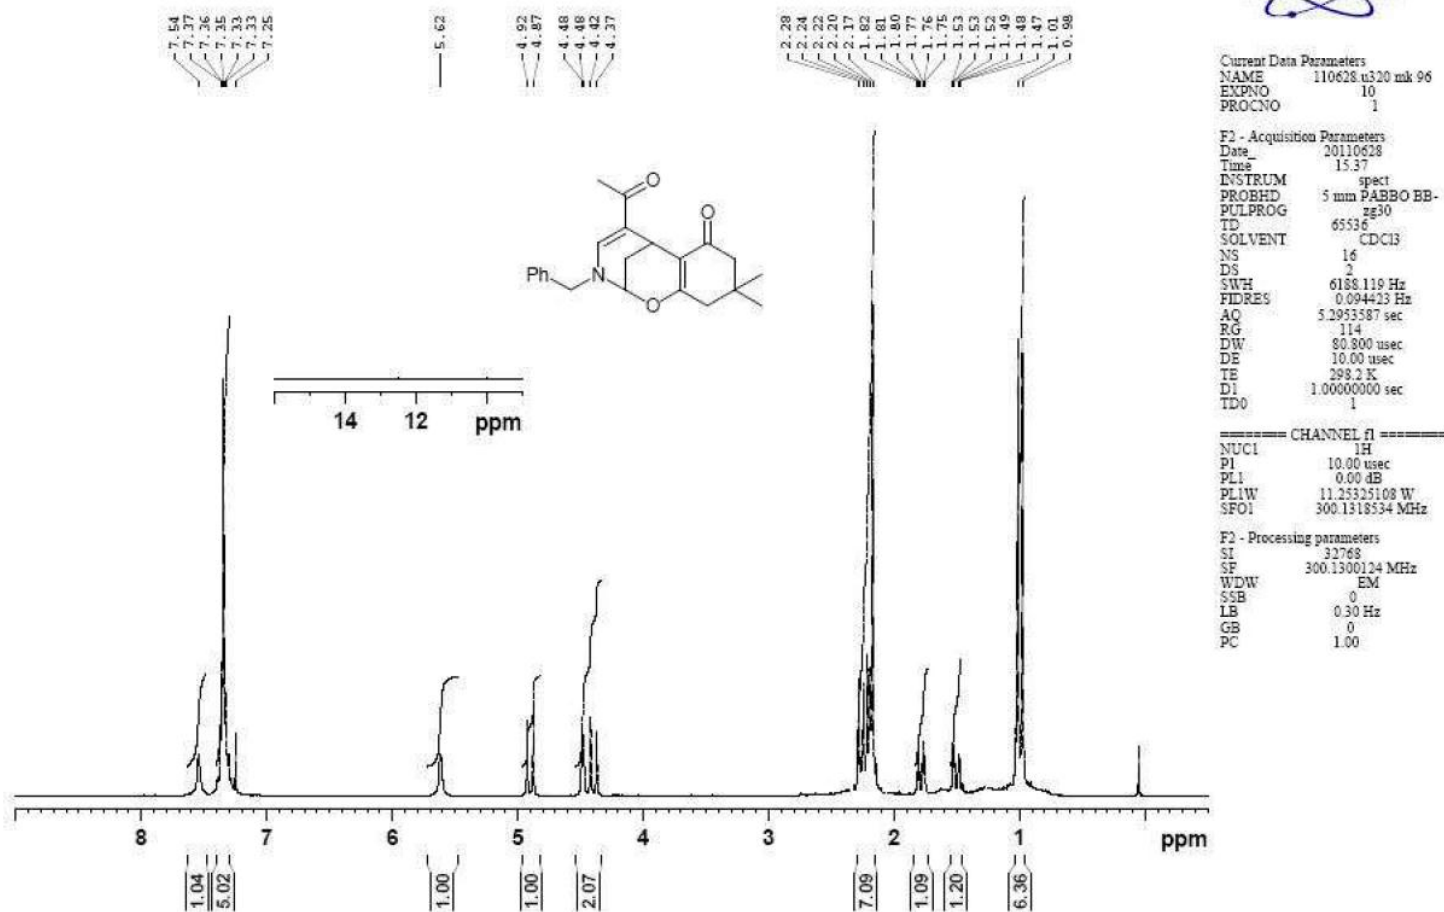

<sup>1</sup>H NMR spectra for compound 3j

Kiamehr, 96-KM, CDCl<sub>3</sub>, 13C

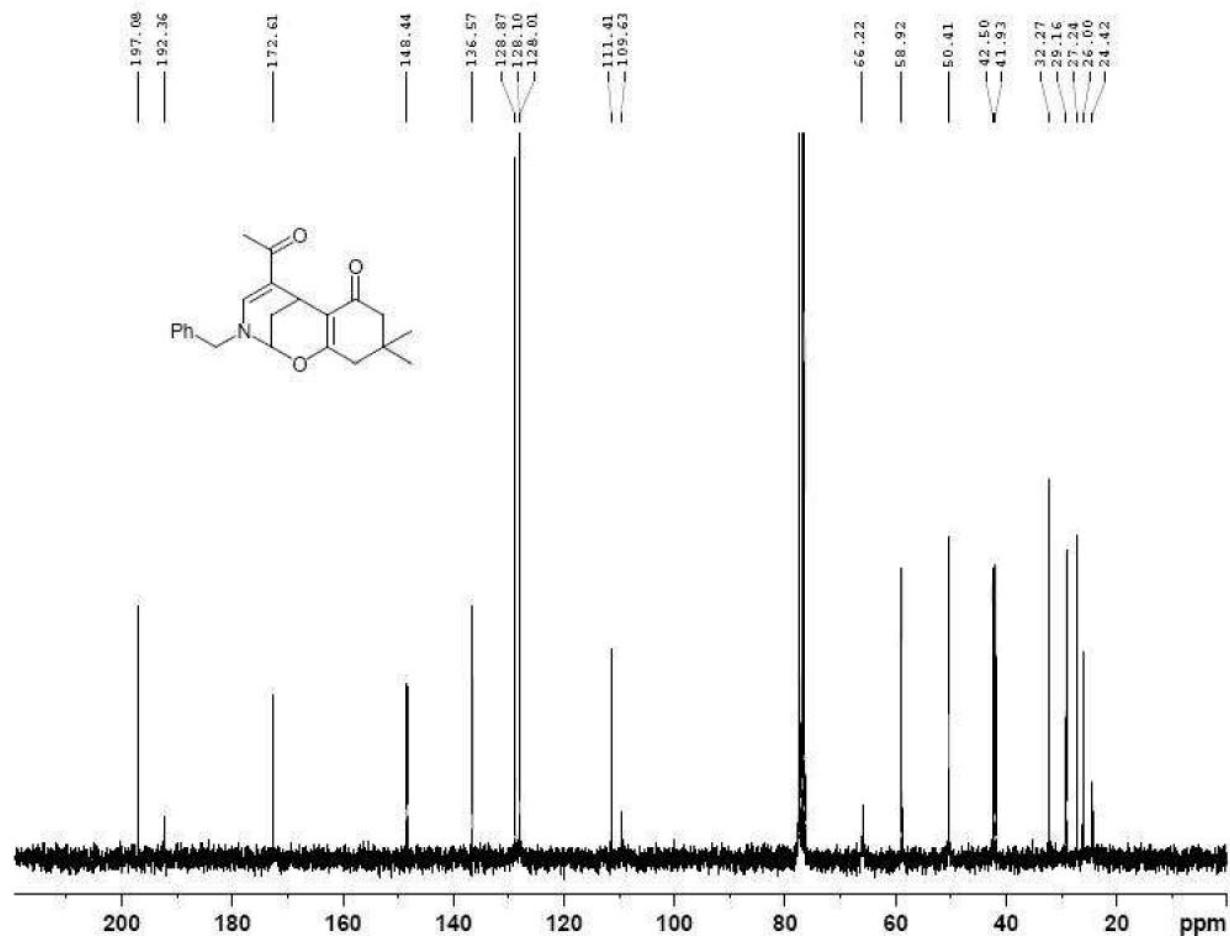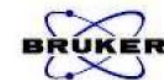

Current Data Parameters  
NAME 110630.201 mk 96 C  
EXPNO 10  
PROCNO 1

F2 - Acquisition Parameters  
Date\_ 20110630  
Time 11.43  
INSTRUM spect  
PROBHD 5 mm PABBO BB-  
PULPROG zgpg30  
TD 65536  
SOLVENT CDCl<sub>3</sub>  
NS 1024  
DS 4  
SWH 15000.000 Hz  
FIDRES 0.228852 Hz  
AQ 2.1845834 sec  
RG 2050  
DW 33.333 usec  
DE 10.00 usec  
TE 300.2 K  
D1 2.00000000 sec  
d11 0.03000000 sec  
DELTA 1.89999998 sec  
TD0 1

===== CHANNEL f1 =====  
NUC1 13C  
P1 10.00 usec  
PL1 -1.00 dB  
SFO1 62.9015280 MHz

===== CHANNEL f2 =====  
CPDPRG2 waltz16  
NUC2 1H  
PCPD2 70.00 usec  
PL12 15.00 dB  
PL13 15.00 dB  
PL2 -2.50 dB  
SFO2 250.1310005 MHz

F2 - Processing parameters  
SI 32768  
SF 62.8952401 MHz  
WDW EM  
SSB 0  
LB 1.00 Hz  
GB 0  
PC 1.40

<sup>13</sup>C NMR spectra for compound 3j



Kiamehr, 85-KM, CDCl<sub>3</sub>, 1H

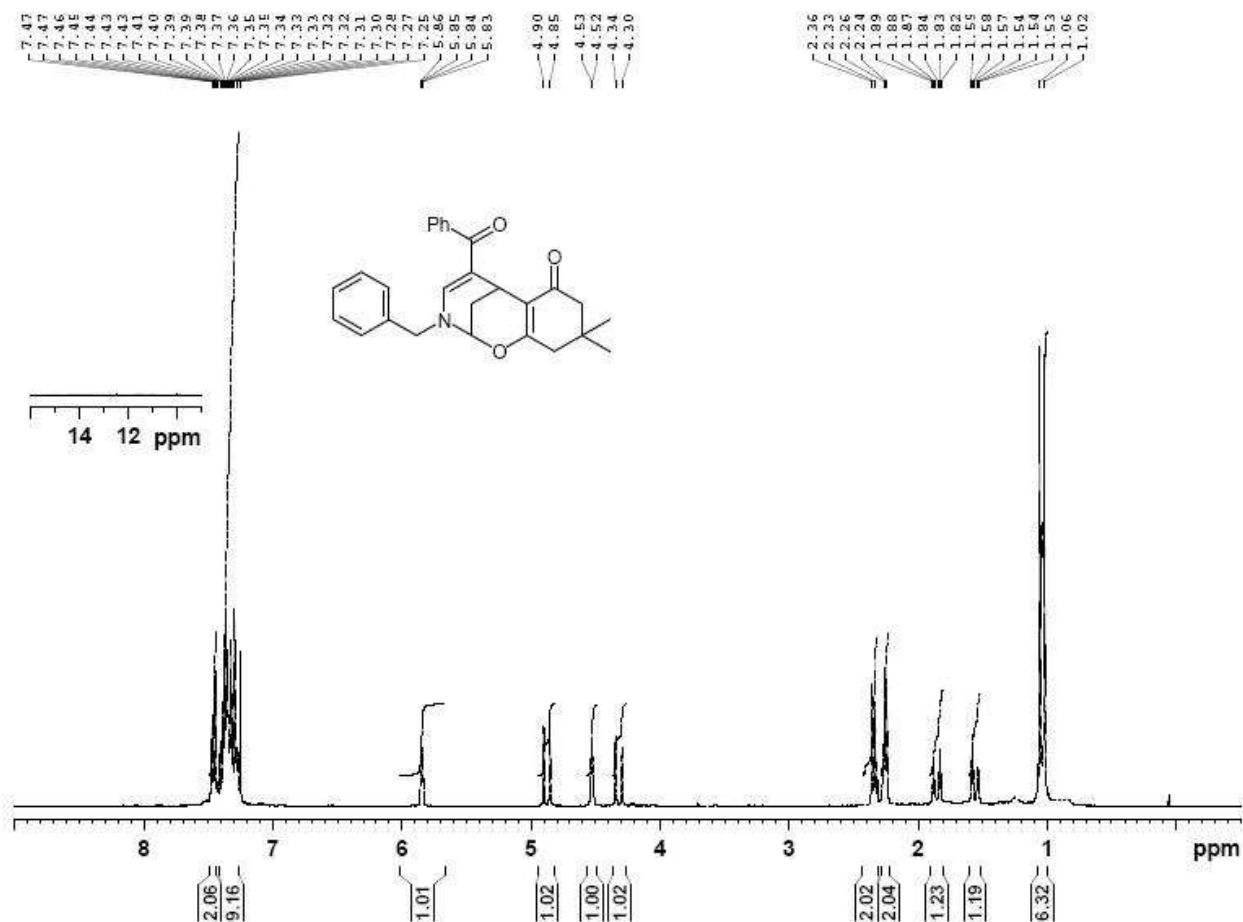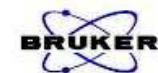

Current Data Parameters  
NAME 110628 u315 mk 85  
EXPNO 10  
PROCNO 1

F1 - Acquisition Parameters  
Date\_ 20110628  
Time 15.04  
INSTRUM spect  
PROBHD 5 mm PABBO BB-  
PULPROG zg30  
TD 65536  
SOLVENT CDCl<sub>3</sub>  
NS 16  
DS 2  
SWH 6188.119 Hz  
FIDRES 0.094423 Hz  
AQ 5.2953587 sec  
RG 161  
DW 80.800 usec  
DE 10.00 usec  
TE 298.2 K  
D1 1.00000000 sec  
TD0 1

===== CHANNEL f1 =====  
NUC1 1H  
P1 10.00 usec  
PL1 0.00 dB  
PL1W 11.25325108 W  
SFO1 300.1318534 MHz

F2 - Processing parameters  
SI 32768  
SE 300.1300116 MHz  
WDW EM  
SSB 0  
LB 0.30 Hz  
GB 0  
PC 1.00

<sup>1</sup>H NMR spectra for compound 3k



Kiamehr KM-85 13C CDC13

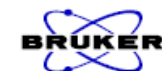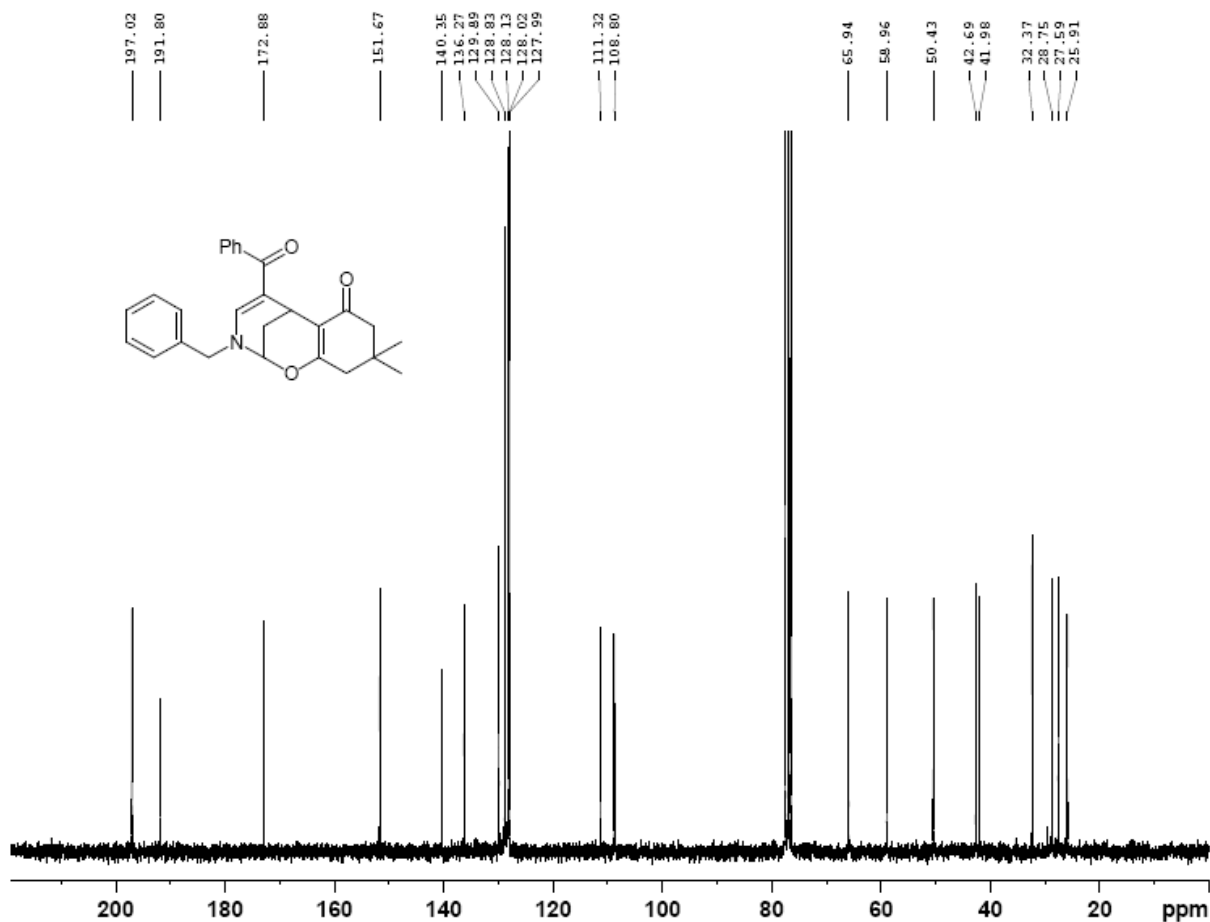

Current Data Parameters  
NAME 110513.203 mk 85 C  
EXPNO 10  
PROCNO 1

F2 - Acquisition Parameters  
Date\_ 20110513  
Time 16.20  
INSTRUM spect  
PROBHD 5 mm PABBO BB-  
PULPROG zgpg30  
TD 65536  
SOLVENT CDCl3  
NS 1024  
DS 4  
SWH 15000.000 Hz  
FIDRES 0.228882 Hz  
AQ 2.1845834 sec  
RG 2050  
DW 33.333 usec  
DE 10.00 usec  
TE 300.0 K  
D1 2.00000000 sec  
d11 0.03000000 sec  
DELTA 1.89999998 sec  
TD0 1

===== CHANNEL f1 =====  
NUC1 13C  
P1 10.00 usec  
PL1 -1.00 dB  
SFO1 62.9015280 MHz

===== CHANNEL f2 =====  
CPDPRG2 waltz16  
NUC2 1H  
PCPD2 70.00 usec  
PL12 15.00 dB  
PL13 15.00 dB  
PL2 -2.50 dB  
SFO2 250.1310005 MHz

F2 - Processing parameters  
SI 32768  
SF 62.8952421 MHz  
WDW EM  
SSB 0  
LB 1.00 Hz  
GB 0  
PC 1.40

<sup>13</sup>C NMR spectra for compound 3k

Kiamehr 40 1H CDCl3

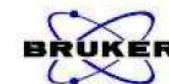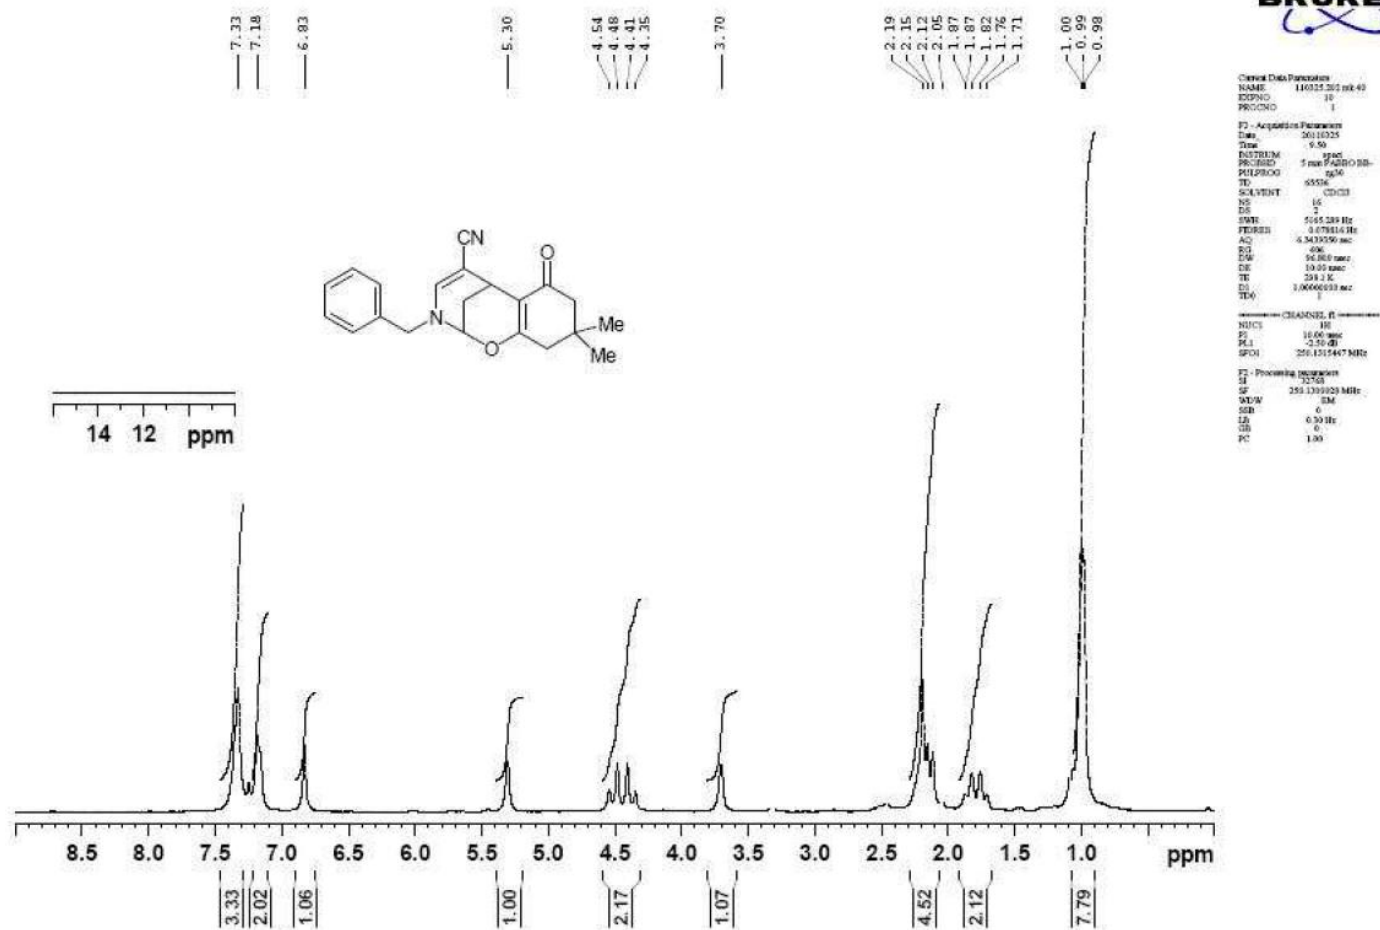

<sup>1</sup>H NMR spectra for compound 31

Klamehr 40 13C CDCl3

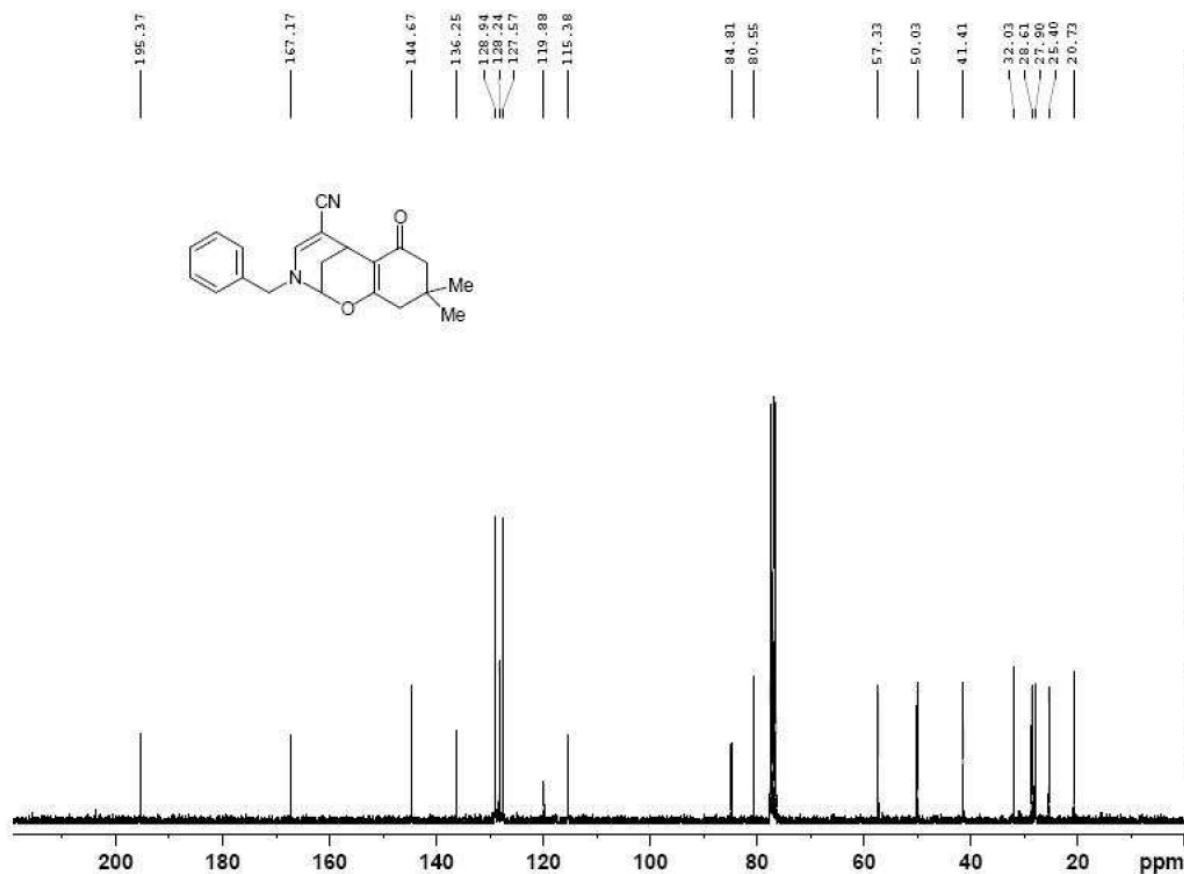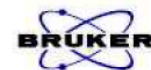

Current Data Parameters  
NAME 110328.206 mk 40 C  
EXPNO 10  
PROCNO 1

F2 - Acquisition Parameters  
Date 20110328  
Time 15.06  
INSTRUM spect  
PROBHD 5 mm PABBO BB-  
PULPROG zgpg30  
TD 65536  
SOLVENT CDCl3  
NS 1024  
DS 4  
SWH 15000.000 Hz  
FIDRES 0.228881 Hz  
AQ 2.1845834 sec  
RG 2050  
DW 33.333 usec  
DE 10.00 usec  
TE 298.2 K  
D1 2.00000000 sec  
d11 0.03000000 sec  
DELTA 1.89999998 sec  
TD0 1

===== CHANNEL f1 =====  
NUC1 13C  
P1 10.00 usec  
PL1 -1.00 dB  
SFO1 62.9015280 MHz

===== CHANNEL f2 =====  
CPDPRG2 waltz16  
NUC2 1H  
PCPD2 70.00 usec  
PL12 15.00 dB  
PL13 15.00 dB  
PL1 -1.50 dB  
SFO2 250.1310005 MHz

F2 - Processing parameters  
SI 32768  
SF 62.8952416 MHz  
WDW EM  
SSB 0  
LB 1.00 Hz  
GB 0  
PC 1.40

<sup>13</sup>C NMR spectra for compound 3l

Kiamehr 25 1H CDCl3

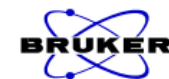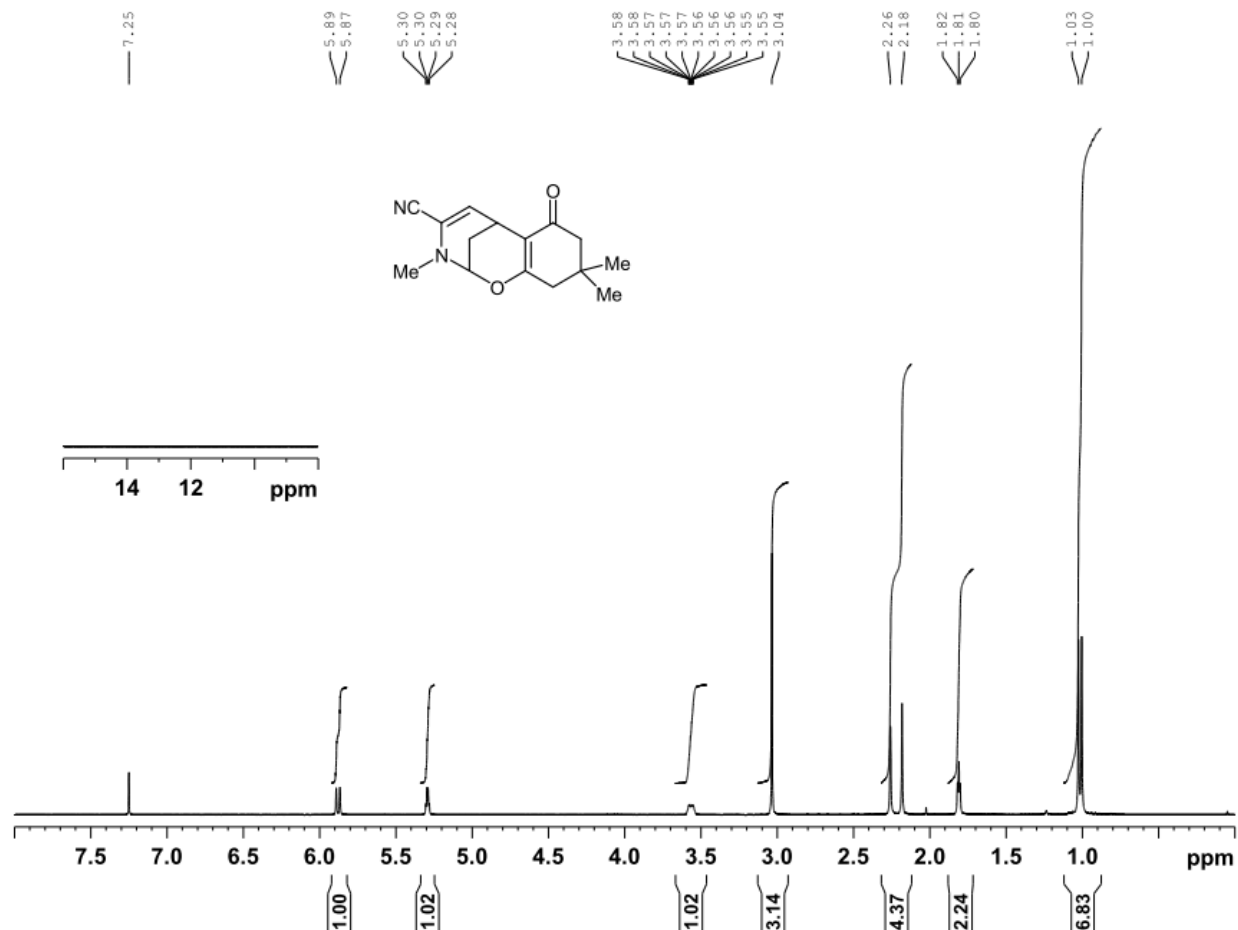

Current Data Parameters  
NAME 110307.u328 mk 25  
EXPNO 10  
PROCNO 1

F2 - Acquisition Parameters  
Date\_ 20110307  
Time 13.50  
INSTRUM spect  
PROBHD 5 mm PABBO BB-  
PULPROG zg30  
TD 65536  
SOLVENT CDCl3  
NS 16  
DS 2  
SWH 6188.119 Hz  
FIDRES 0.094423 Hz  
AQ 5.2953587 sec  
RG 128  
DW 80.800 usec  
DE 10.00 usec  
TE 298.2 K  
D1 1.00000000 sec  
TD0 1

===== CHANNEL f1 =====  
NUC1 1H  
P1 10.00 usec  
PL1 0.00 dB  
PL1W 11.25325108 W  
SFO1 300.1318534 MHz

F2 - Processing parameters  
SI 32768  
SF 300.1300109 MHz  
WDW EM  
SSB 0  
LB 0.30 Hz  
GB 0  
PC 1.00

<sup>1</sup>H NMR spectra for compound 4a

Kiamehr 25 13C CDC13

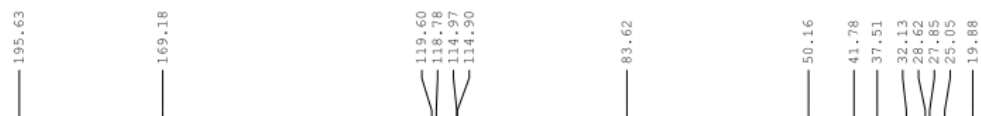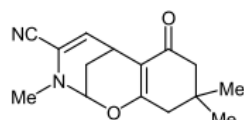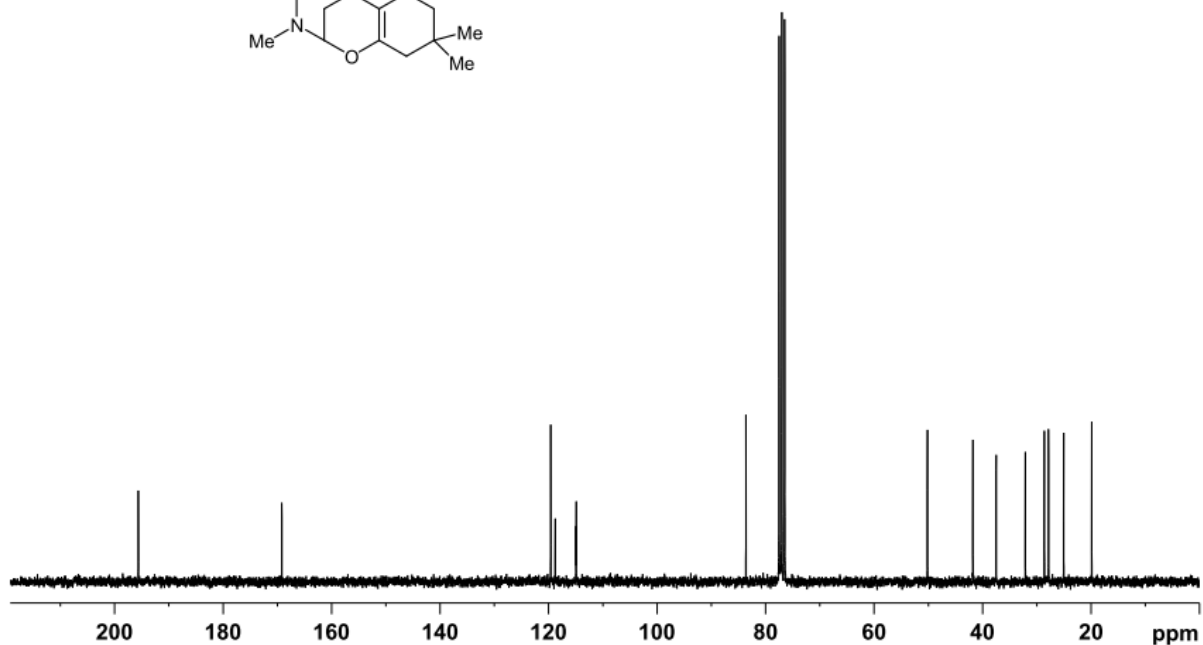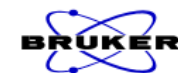

Current Data Parameters  
NAME 110308.208 mk 25  
EXPNO 10  
PROCNO 1

F2 - Acquisition Parameters  
Date\_ 20110309  
Time 2.41  
INSTRUM spect  
PROBHD 5 mm PABBO BB-  
PULPROG zgpg30  
TD 65536  
SOLVENT CDC13  
NS 1024  
DS 4  
SWH 15000.000 Hz  
FIDRES 0.228882 Hz  
AQ 2.1845834 sec  
RG 2050  
DW 33.333 usec  
DE 10.00 usec  
TE 298.0 K  
D1 2.00000000 sec  
d11 0.03000000 sec  
DELTA 1.89999998 sec  
TD0 1

===== CHANNEL f1 =====  
NUC1 13C  
P1 10.00 usec  
PL1 -1.00 dB  
SFO1 62.9015280 MHz

===== CHANNEL f2 =====  
CPDPRG2 waltz16  
NUC2 1H  
PCPD2 70.00 usec  
PL12 15.00 dB  
PL13 15.00 dB  
PL2 -2.50 dB  
SFO2 250.1310005 MHz

F2 - Processing parameters  
SI 32768  
SF 62.8952397 MHz  
WDW EM  
SSB 0  
LB 1.00 Hz  
GB 0  
PC 1.40

<sup>13</sup>C NMR spectra for compound 4a

Kiamehr KM-52 1H CDCl3

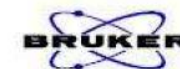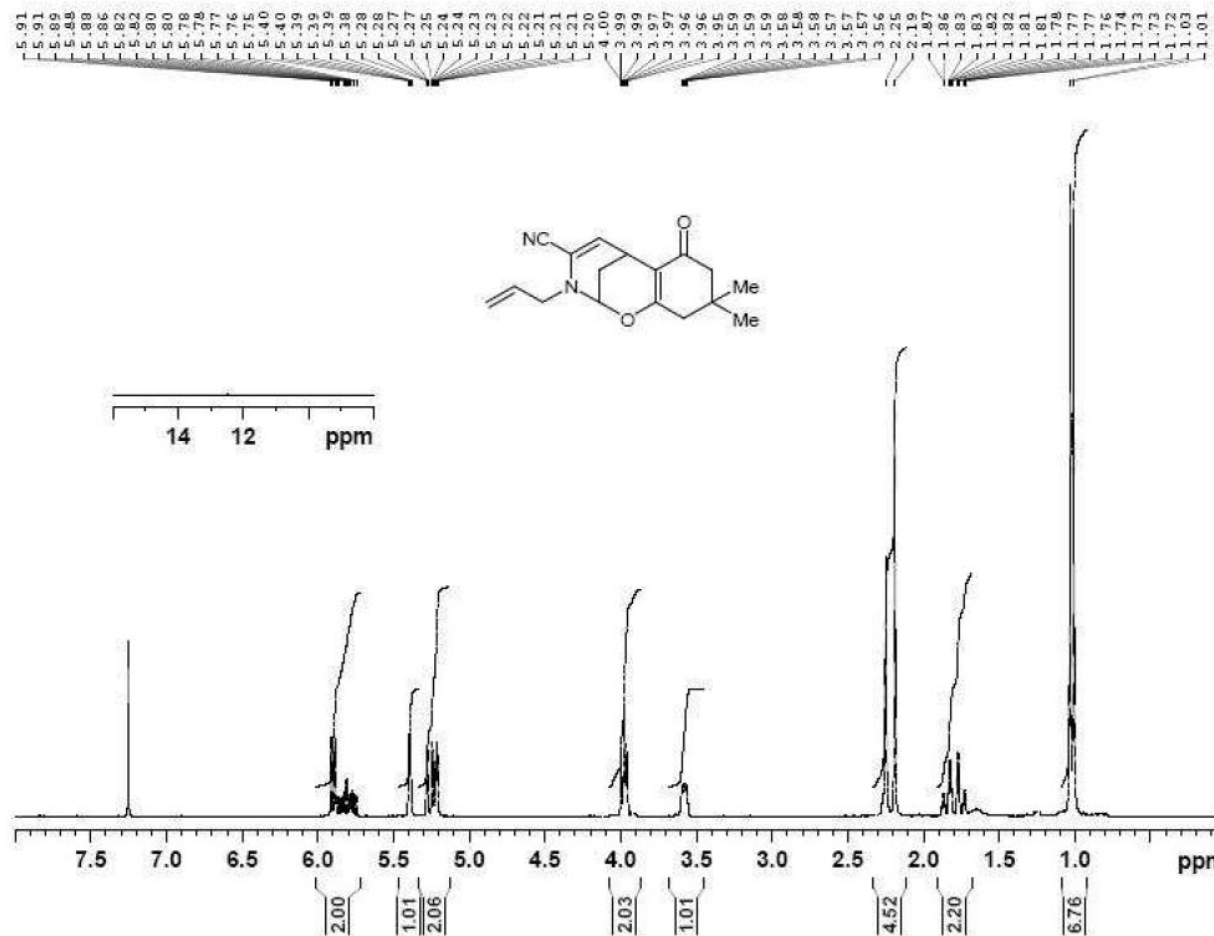

Current Data Parameters  
 NAME 110411 u312 mk 52  
 EXPNO 10  
 PROCNO 1

F2 - Acquisition Parameters  
 Date\_ 20110411  
 Time 10.44  
 INSTRUM spect  
 PROBHD 5 mm PABBO BB-  
 PULPROG zg30  
 TD 65536  
 SOLVENT CDCl3  
 NS 16  
 DS 2  
 SWH 6188.119 Hz  
 FIDRES 0.094423 Hz  
 AQ 5.2953587 sec  
 RG 144  
 DW 80.800 usec  
 DE 10.00 usec  
 TE 298.2 K  
 D1 1.00000000 sec  
 TD0 1

===== CHANNEL f1 =====  
 NUC1 1H  
 P1 10.00 usec  
 PL1 0.00 dB  
 PL1W 11.25325108 W  
 SFO1 300.1318534 MHz

F2 - Processing parameters  
 SI 32768  
 SF 300.1300109 MHz  
 WDW EM  
 SSB 0  
 LB 0.30 Hz  
 GB 0  
 PC 1.00

<sup>1</sup>H NMR spectra for compound 4b

Kiamehr KM-52 13C CDCl3

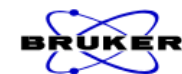

Current Data Parameters  
 NAME 110411.206 mk 52 C  
 EXPNO 10  
 PROCNO 1

F2 - Acquisition Parameters  
 Date\_ 20110411  
 Time 22.42  
 INSTRUM spect  
 PROBHD 5 mm PABBO BB-  
 PULPROG zgpg30  
 TD 65536  
 SOLVENT CDCl3  
 NS 1024  
 DS 4  
 SWH 15000.000 Hz  
 FIDRES 0.228882 Hz  
 AQ 2.1845834 sec  
 RG 2050  
 DW 33.333 usec  
 DE 10.00 usec  
 TE 298.1 K  
 D1 2.00000000 sec  
 d11 0.03000000 sec  
 DELTA 1.89999998 sec  
 TD0 1

===== CHANNEL f1 =====  
 NUC1 13C  
 P1 10.00 usec  
 PL1 -1.00 dB  
 SFO1 62.9015280 MHz

===== CHANNEL f2 =====  
 CPDPRG2 waltz16  
 NUC2 1H  
 PCPD2 70.00 usec  
 PL12 15.00 dB  
 PL13 15.00 dB  
 PL2 -2.50 dB  
 SFO2 250.1310005 MHz

F2 - Processing parameters  
 SI 32768  
 SF 62.8952393 MHz  
 WDW EM  
 SSB 0  
 LB 1.00 Hz  
 GB 0  
 PC 1.40

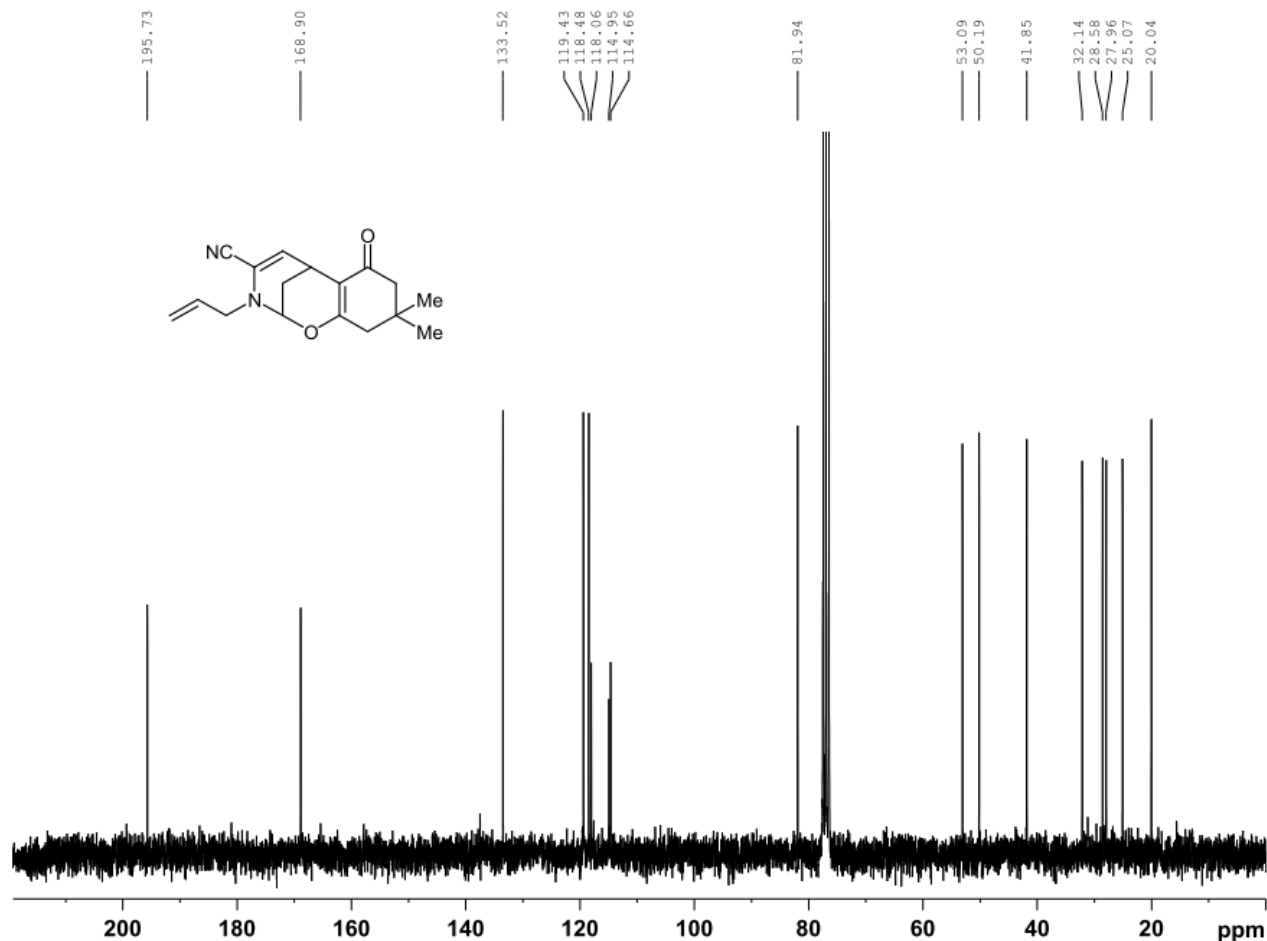

<sup>13</sup>C NMR spectra for compound 4b

Kiamehr KM-51 1H CDCl3

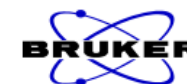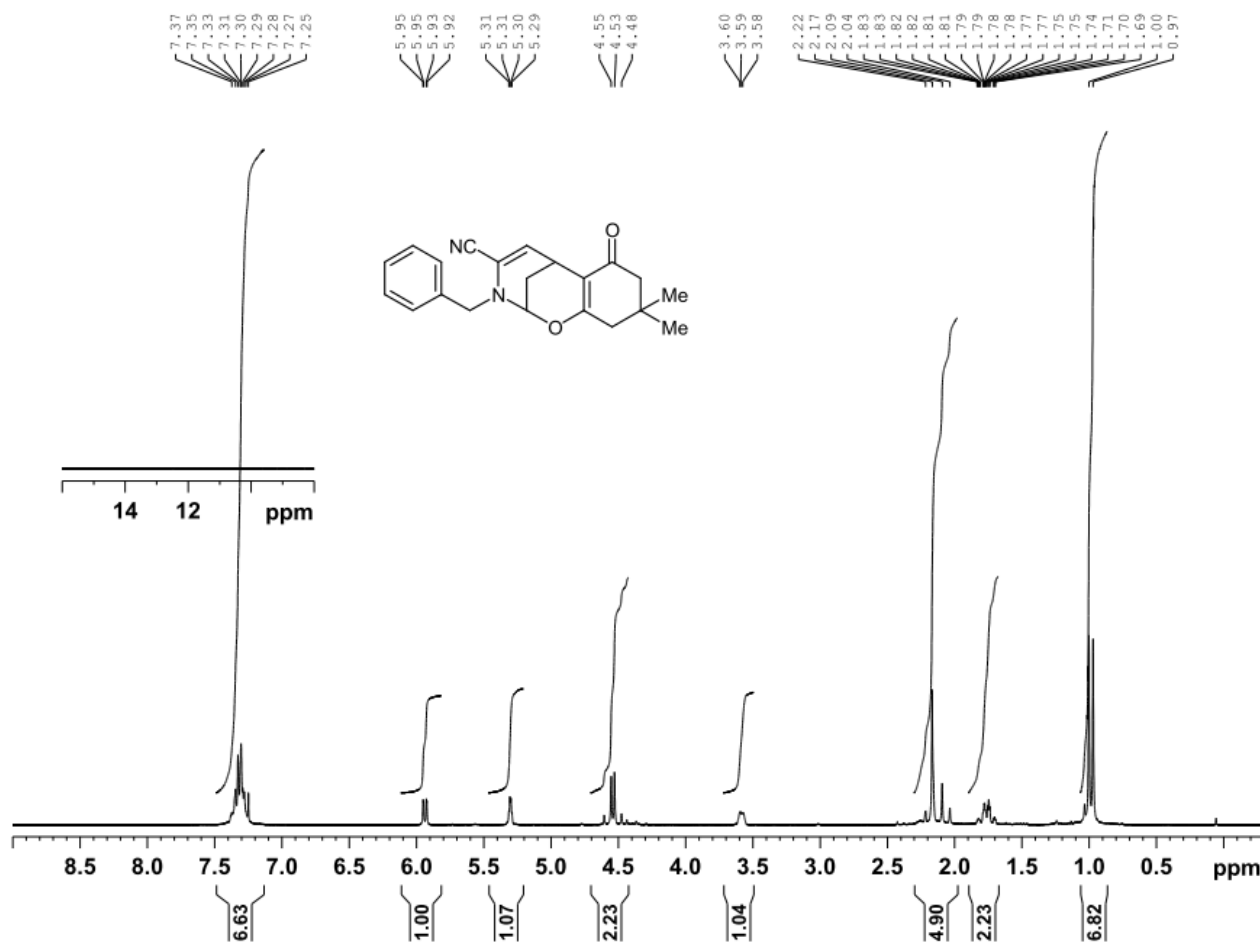

Current Data Parameters  
 NAME 110412.u303 mk 51  
 EXPNO 10  
 PROCNO 1

F2 - Acquisition Parameters  
 Date\_ 20110412  
 Time 8.47  
 INSTRUM spect  
 PROBHD 5 mm PABBO BB-  
 PULPROG zg30  
 TD 65536  
 SOLVENT CDCl3  
 NS 16  
 DS 2  
 SWH 6188.119 Hz  
 FIDRES 0.094423 Hz  
 AQ 5.2953587 sec  
 RG 101  
 DW 80.800 usec  
 DE 10.00 usec  
 TE 298.2 K  
 D1 1.00000000 sec  
 TD0 1

CHANNEL f1  
 NUC1 1H  
 P1 10.00 usec  
 PL1 0.00 dB  
 PL1W 11.25325108 W  
 SFO1 300.1318534 MHz

F2 - Processing parameters  
 SI 32768  
 SF 300.1300118 MHz  
 WDW EM  
 SSB 0  
 LB 0.30 Hz  
 GB 0  
 PC 1.00

<sup>1</sup>H NMR spectra for compound 4c



Kiamehr KM-51 13C CDCl3

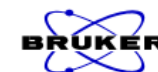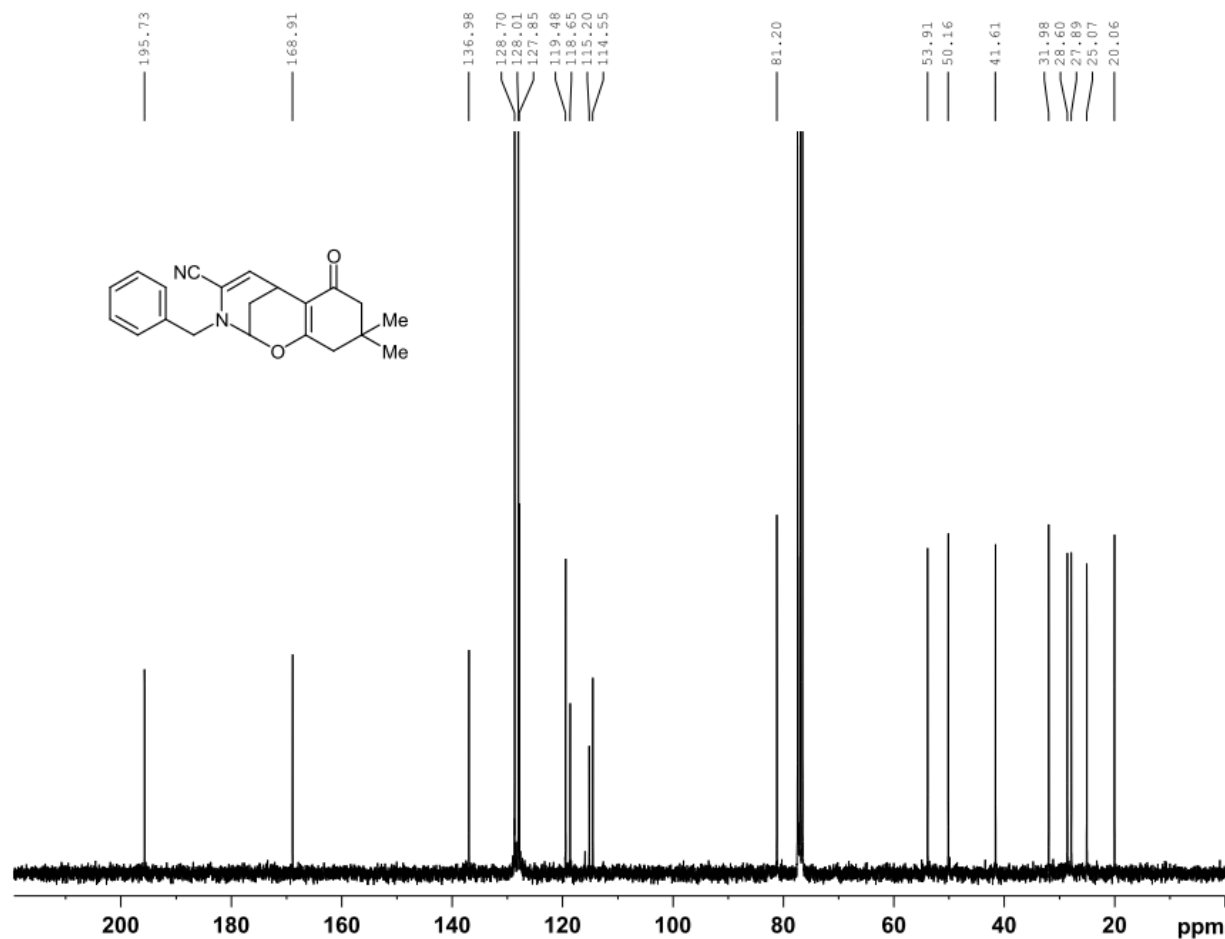

Current Data Parameters  
NAME 110412.u303 mk 51  
EXPNO 11  
PROCNO 1

F2 - Acquisition Parameters  
Date\_ 20110412  
Time 18.08  
INSTRUM spect  
PROBHD 5 mm PABBO BB-  
PULPROG zgpg30  
TD 65536  
SOLVENT CDCl3  
NS 1024  
DS 4  
SWH 18028.846 Hz  
FIDRES 0.275098 Hz  
AQ 1.8175818 sec  
RG 2050  
DW 27.733 usec  
DE 10.00 usec  
TE 298.9 K  
D1 2.00000000 sec  
D11 0.03000000 sec  
TD0 1

CHANNEL f1  
NUC1 13C  
P1 10.00 usec  
PL1 -0.50 dB  
PL1W 33.25691986 W  
SFO1 75.4752953 MHz

CHANNEL f2  
CPDPRG2 waltz16  
NUC2 1H  
PCPD2 72.00 usec  
PL2 0.00 dB  
PL12 17.00 dB  
PL13 17.00 dB  
PL2W 11.25325108 W  
PL12W 0.22453187 W  
PL13W 0.22453187 W  
SFO2 300.1312005 MHz

F2 - Processing parameters  
SI 32768  
SF 75.4677525 MHz  
WDW EM  
SSB 0  
LB 1.00 Hz  
GB 0  
PC 1.40

<sup>13</sup>C NMR spectra for compound 4c

Kiamehr KM-34 1H CDCl3

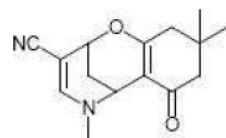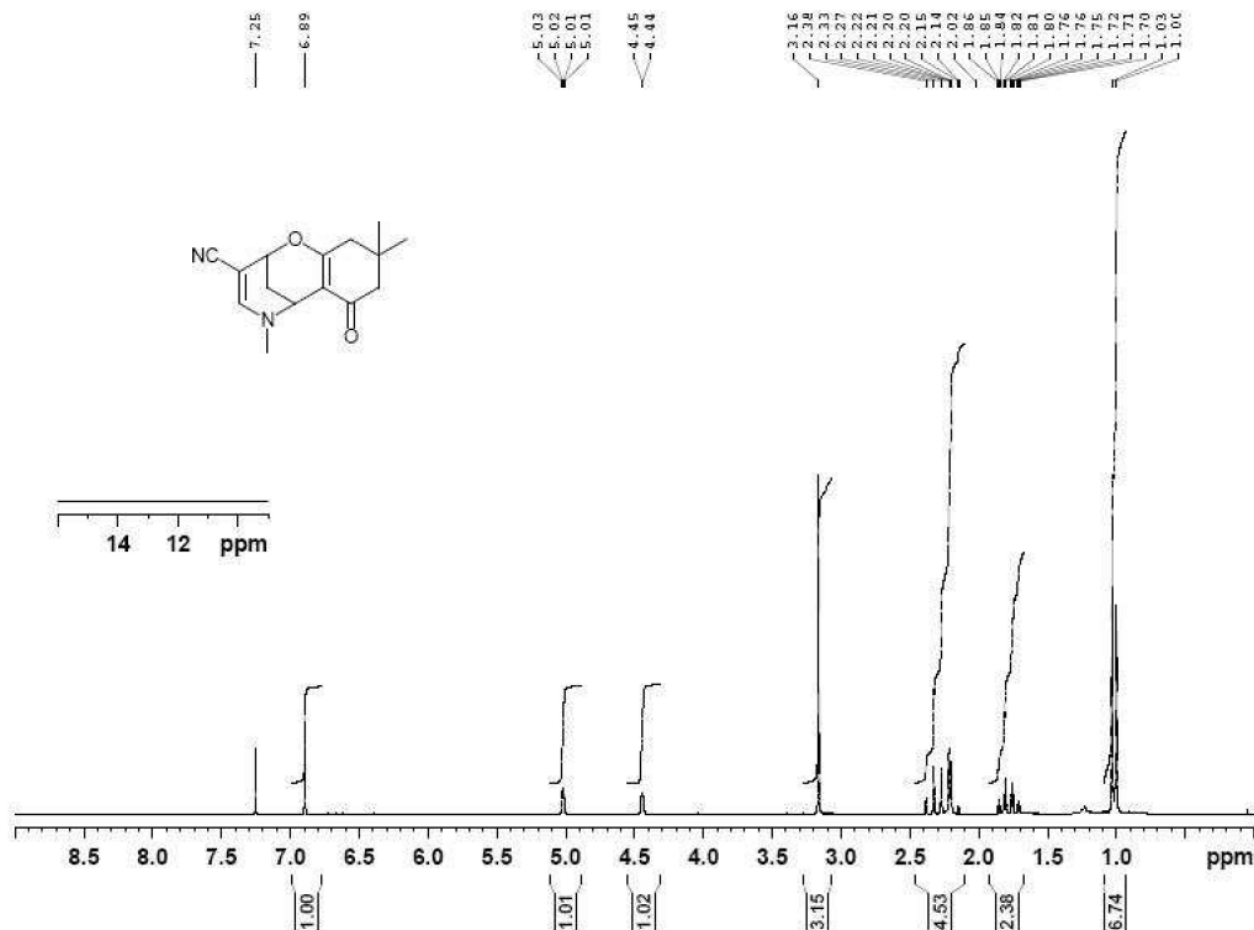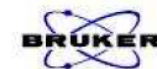

Current Data Parameters  
NAME 110302.m302 mk 21-1  
EXPNO 10  
PROCNO 1

F2 - Acquisition Parameters  
Date\_ 20110302  
Time 8.54  
INSTRUM spect  
PROBHD 5 mm PABBO BB-  
PULPROG zg30  
TD 65536  
SOLVENT CDCl3  
NS 16  
DS 2  
SWH 6188.119 Hz  
FIDRES 0.094433 Hz  
AQ 5.2953587 sec  
RG 128  
DW 80.800 usec  
DE 10.00 usec  
TE 296.3 K  
D1 1.00000000 sec  
TD0 1

CHANNEL f1  
NUC1 1H  
P1 10.00 usec  
PL1 0.00 dB  
PL1W 11.25325108 W  
SFO1 300.1318534 MHz

F2 - Processing parameters  
SI 32768  
SF 300.1300109 MHz  
WDW EM  
SSB 0  
LB 0.30 Hz  
GB 0  
PC 1.00

<sup>1</sup>H NMR spectra for compound 5

Kiamehr KM-34 13C CDCl3

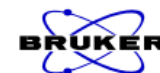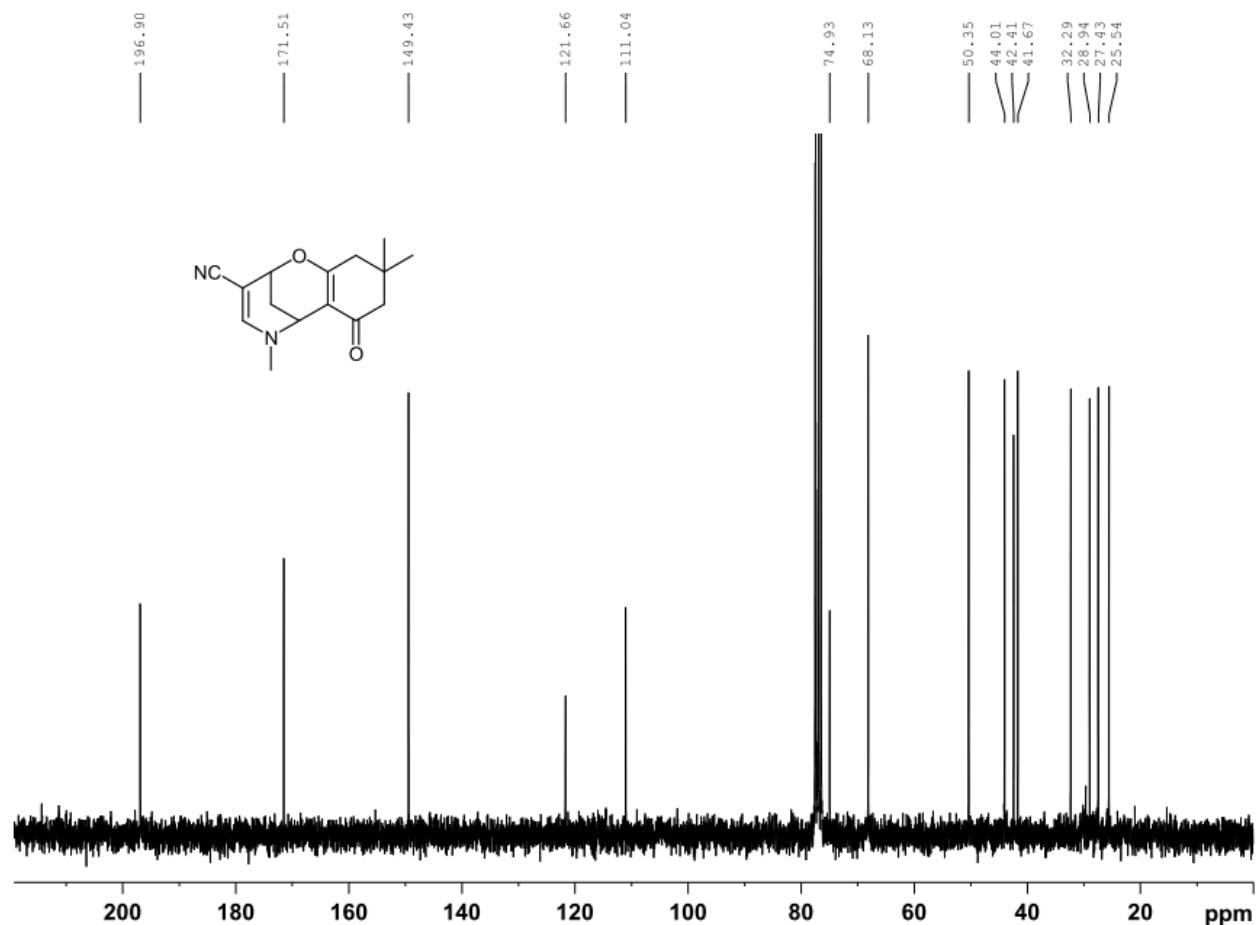

Current Data Parameters  
 NAME 110303.210 mk 34 (21-1) C  
 EXPNO 10  
 PROCNO 1

F2 - Acquisition Parameters  
 Date 20110304  
 Time 0.05  
 INSTRUM spect  
 PROBHD 5 mm PABBO BB-  
 PULPROG zgpg30  
 TD 65536  
 SOLVENT CDCl3  
 NS 1024  
 DS 4  
 SWH 15000.000 Hz  
 FIDRES 0.228882 Hz  
 AQ 2.1845834 sec  
 RG 2050  
 DW 33.333 usec  
 DE 10.00 usec  
 TE 297.9 K  
 D1 2.00000000 sec  
 d11 0.03000000 sec  
 DELTA 1.89999998 sec  
 TD0 1

===== CHANNEL f1 =====  
 NUC1 13C  
 P1 10.00 usec  
 PL1 -1.00 dB  
 SFO1 62.9015280 MHz

===== CHANNEL f2 =====  
 CPDPRG2 waltz16  
 NUC2 1H  
 PCPD2 70.00 usec  
 PL12 15.00 dB  
 PL13 15.00 dB  
 PL2 -2.50 dB  
 SFO2 250.1310005 MHz

F2 - Processing parameters  
 SI 32768  
 SF 62.8952402 MHz  
 WDW EM  
 SSB 0  
 LB 1.00 Hz  
 GB 0  
 PC 1.40

<sup>13</sup>C NMR spectra for compound 5

Kiamehr,95-KM, CDC13, 1H

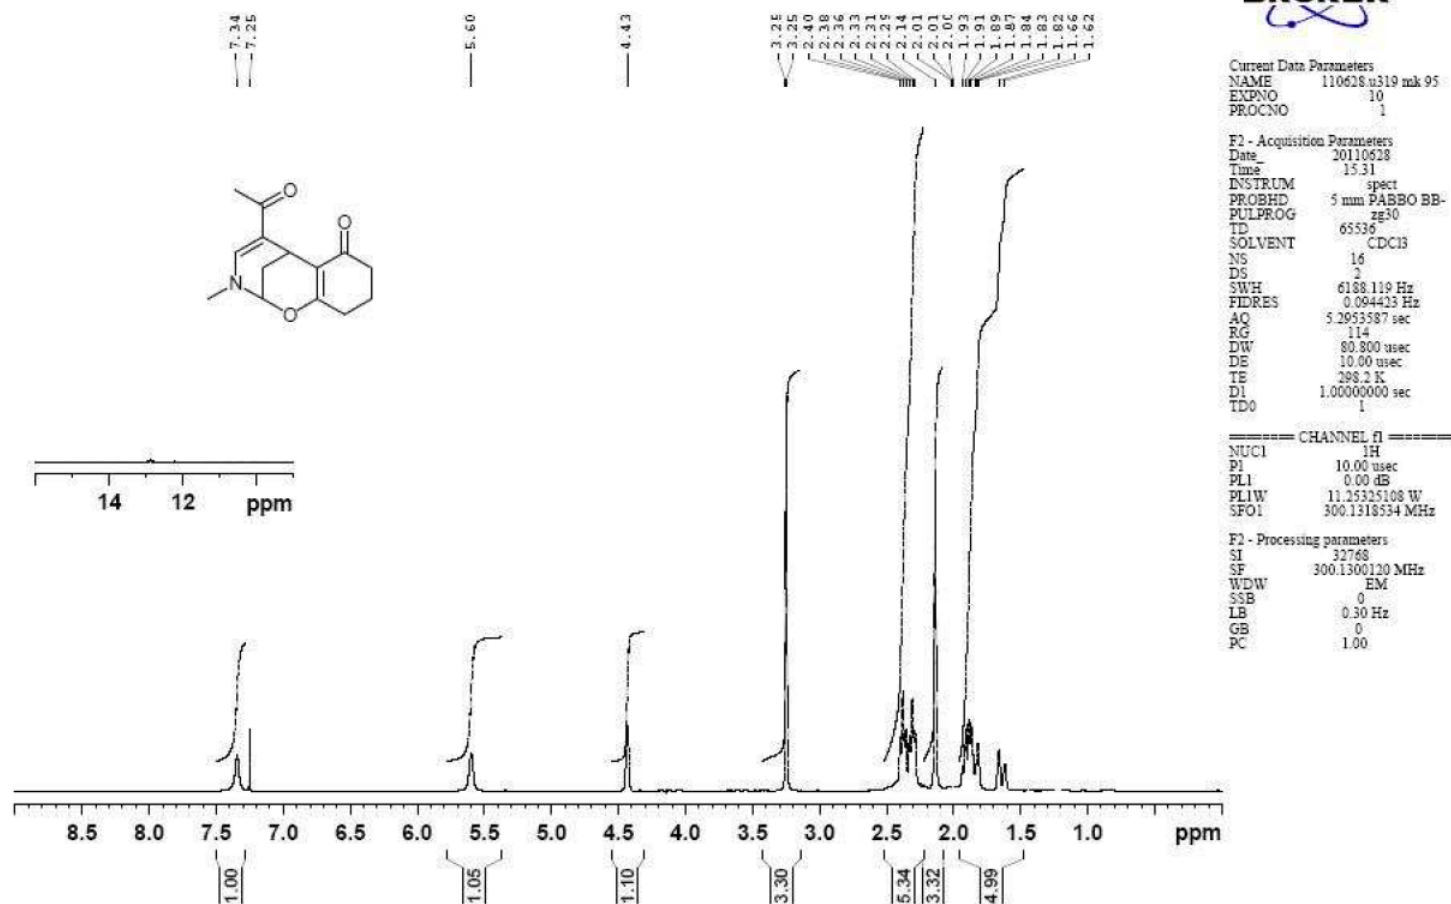

<sup>1</sup>H NMR spectra for compound 6a

Klamehr, 95-KM, CDCl<sub>3</sub>, <sup>13</sup>C

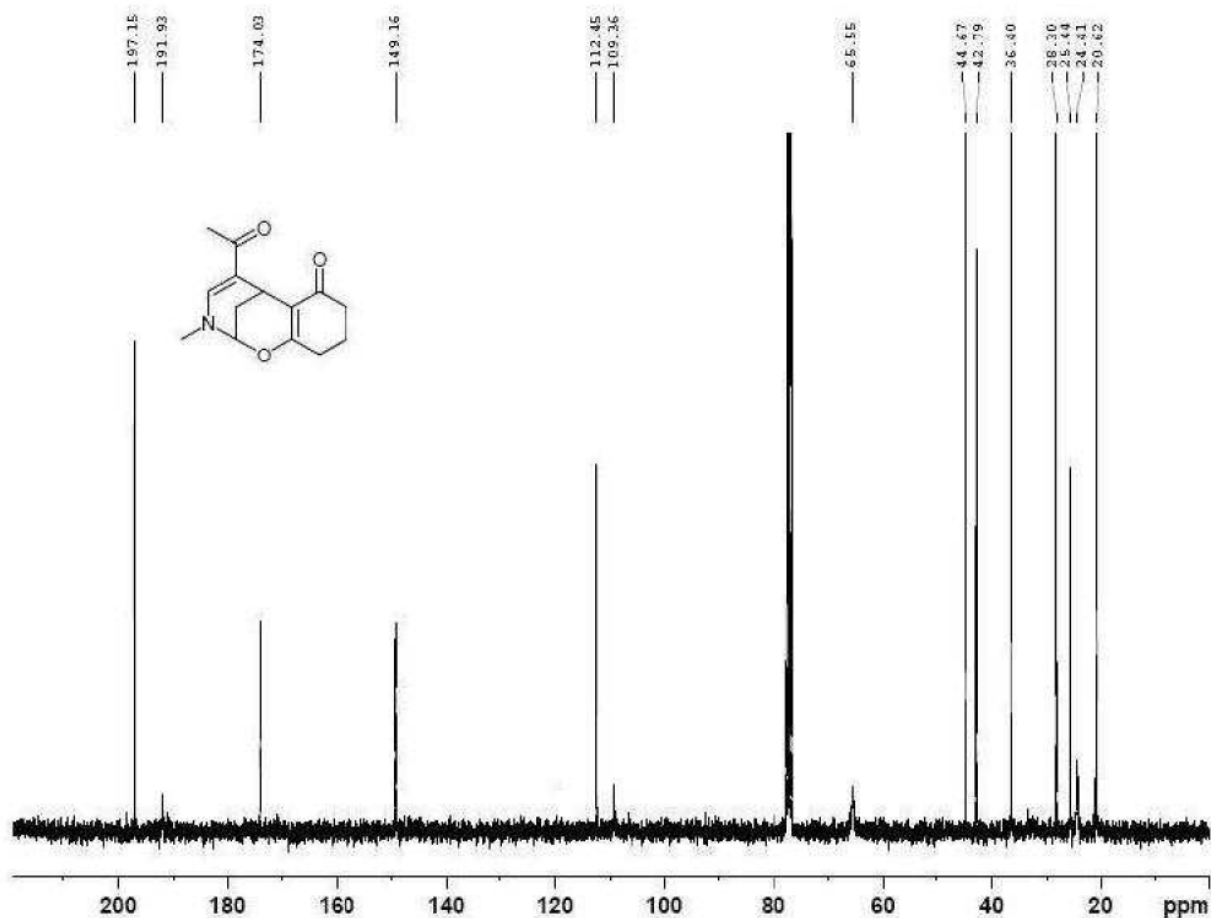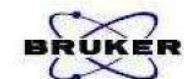

Current Data Parameters  
NAME 110429.n330 mk 95 C  
EXPNO 10  
PROCNO 1

F2 - Acquisition Parameters  
Date\_ 20100330  
Time 5:13  
INSTRUM spect  
PROBHD 5 mm SABBO BB-  
PULPROG zgpg30  
TD 65536  
SOLVENT CDCl<sub>3</sub>  
NS 1024  
DS 4  
SWH 18028.846 Hz  
FIDRES 0.275098 Hz  
AQ 1.8175818 sec  
RG 3050  
DW 27.33 usec  
DE 10.00 usec  
TE 298.2 K  
D1 2.6000000 sec  
D11 0.0300000 sec  
TD0 1

===== CHANNEL f1 =====  
NUC1 <sup>13</sup>C  
P1 16.00 usec  
PL1 -0.50 dB  
PL1W 33.15691986 W  
SFO1 75.4752953 MHz

===== CHANNEL f2 =====  
CPDPRG2 waltz16  
NUC2 <sup>1</sup>H  
PCPD2 72.00 usec  
PL2 0.00 dB  
PL12 17.00 dB  
PL13 17.00 dB  
PL2W 11.25235108 W  
PL12W 0.12453187 W  
PL13W 0.12453187 W  
SFO2 300.1312005 MHz

F2 - Processing parameters  
SI 32768  
SF 75.4677547 MHz  
WDW EM  
SSB 0  
LB 1.00 Hz  
GB 0  
PC 1.40

<sup>13</sup>C NMR spectra for compound 6a

Kiamehr, 70-KM, CDCl<sub>3</sub>, 1H

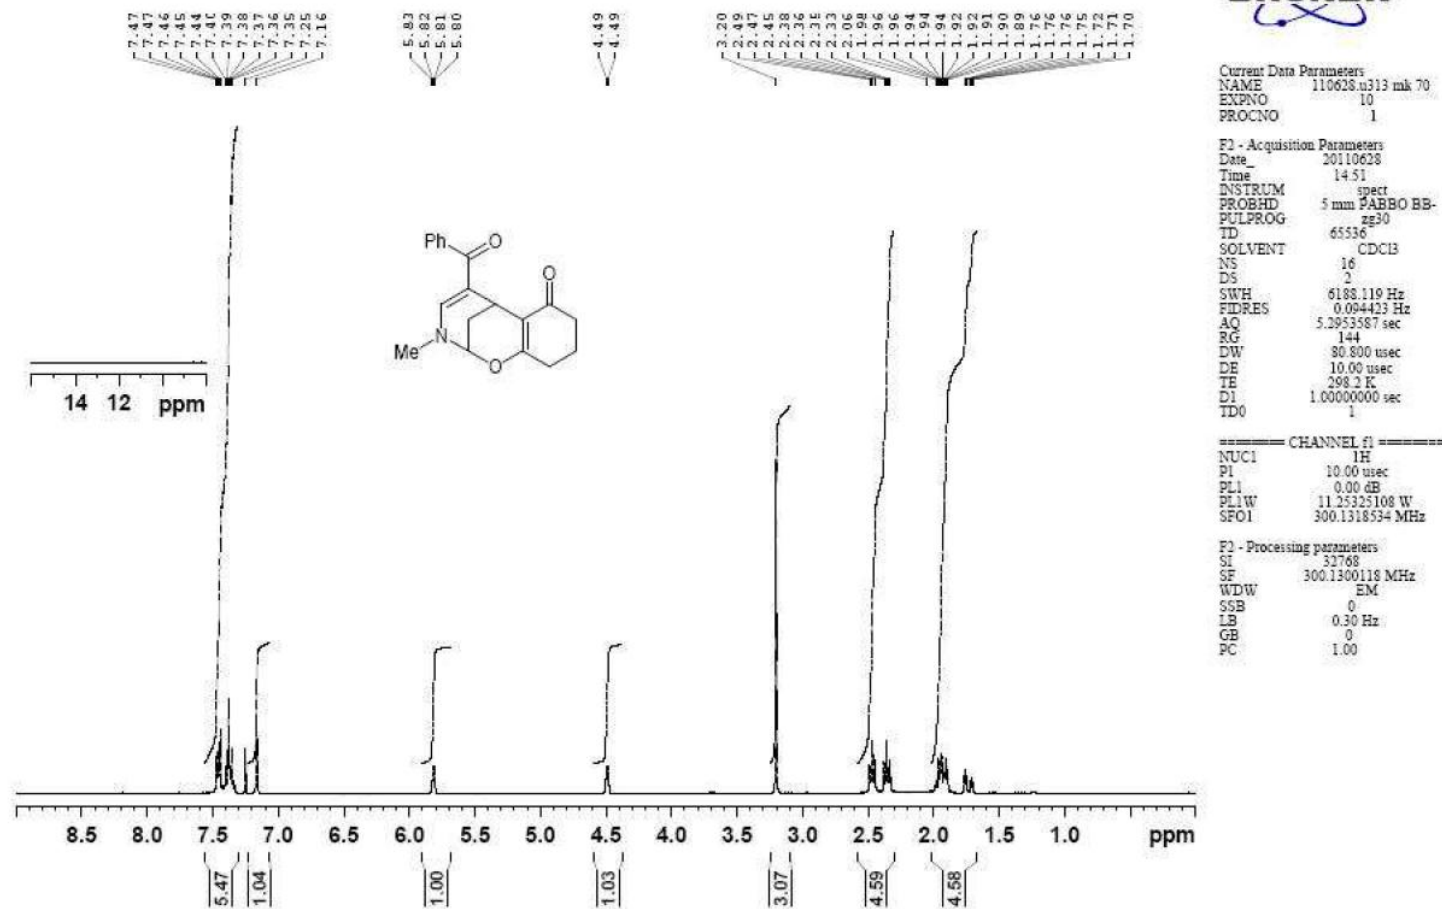

<sup>1</sup>H NMR spectra for compound 6b

Kiamehr 70 13C CDCl3

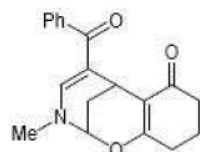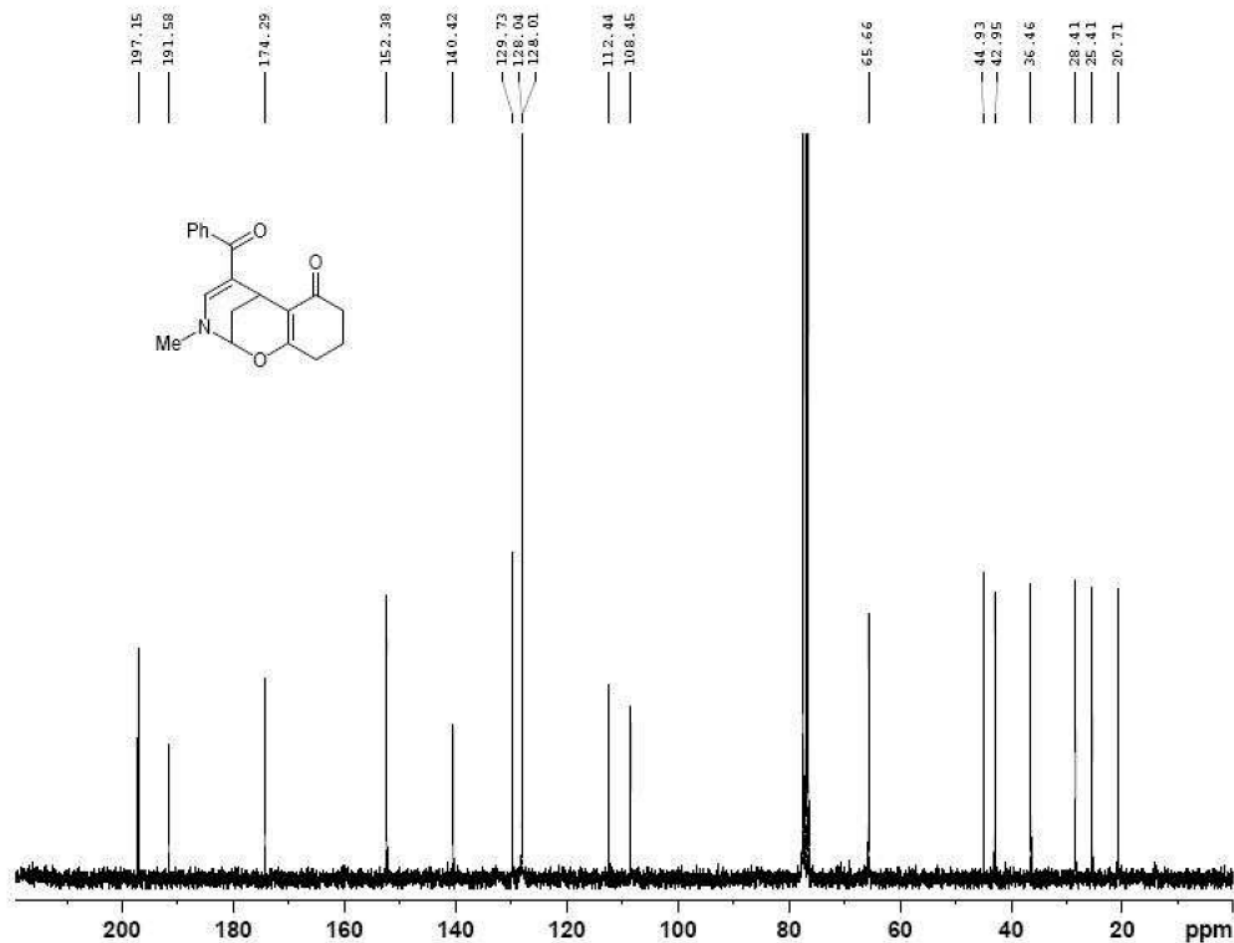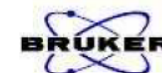

Current Data Parameters  
NAME 110506 206 mk 70 C  
EXPNO 10  
PROCNO 1

F2 - Acquisition Parameters  
Date\_ 20110507  
Time 1.15  
INSTRUM spect  
PROBHD 5 mm PABBO BB-  
PULPROG zgpg30  
TD 65536  
SOLVENT CDCl3  
NS 1024  
DS 4  
SWH 15000.000 Hz  
FIDRES 0.238882 Hz  
AQ 2.1845834 sec  
RG 2050  
DW 33.333 usec  
DE 10.00 usec  
TE 298.0 K  
D1 2.00000000 sec  
d11 0.03000000 sec  
DELTA 1.89999998 sec  
TD0 1

===== CHANNEL f1 =====  
NUC1 13C  
P1 10.00 usec  
PL1 -1.00 dB  
SFO1 62.9015280 MHz

===== CHANNEL f2 =====  
CPDPRG2 waltz16  
NUC2 1H  
PCPD2 70.00 usec  
PL12 15.00 dB  
PL13 15.00 dB  
PL2 -2.50 dB  
SFO2 250.1310005 MHz

F2 - Processing parameters  
S1 32768  
SF 62.8952411 MHz  
WDW EM  
SSB 0  
LB 1.00 Hz  
GB 0  
PC 1.40

<sup>13</sup>C NMR spectra for compound 6b

Kiamehr, KM-115-2, CDCl<sub>3</sub>, 1H

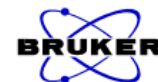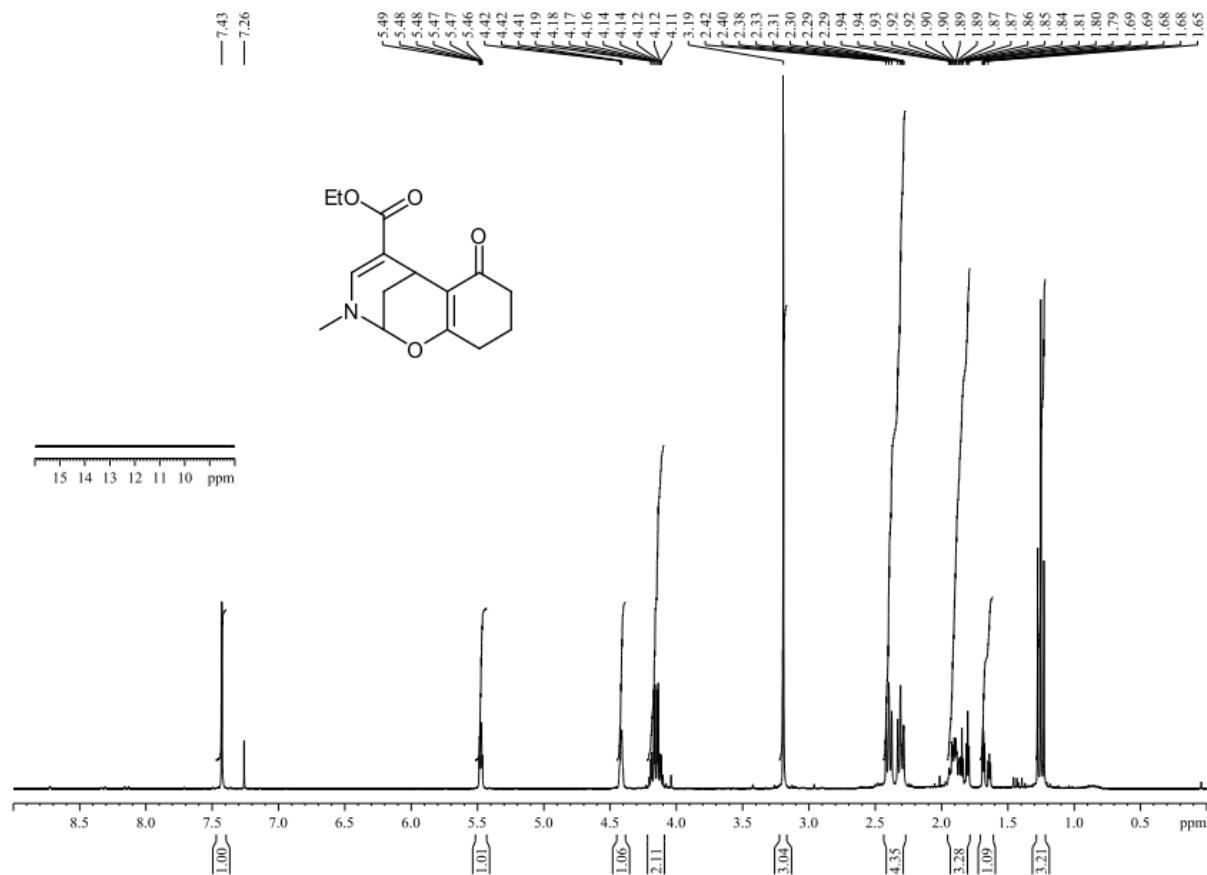

Current Data Parameters  
NAME 110712.u318  
EXPNO 10  
PROCNO 1

F2 - Acquisition Parameters  
Date\_ 20110712  
Time 11.09  
INSTRUM spect  
PROBHD 5 mm PABBO BB-  
PULPROG zg30  
TD 65536  
SOLVENT CDCl<sub>3</sub>  
NS 16  
DS 2  
SWH 6188.119 Hz  
FIDRES 0.094423 Hz  
AQ 5.2953587 sec  
RG 80.6  
DW 80.800 usec  
DE 10.00 usec  
TE 298.2 K  
D1 1.00000000 sec  
TD0 1

===== CHANNEL f1 =====  
NUC1 1H  
P1 10.00 usec  
PL1 0.00 dB  
PL1W 11.25325108 W  
SFO1 300.1318534 MHz

F2 - Processing parameters  
SI 32768  
SF 300.1300088 MHz  
WDW EM  
SSB 0  
LB 0.30 Hz  
GB 0  
PC 1.00

<sup>1</sup>H NMR spectra for compound 6c



Kiamehr, KM-115-2, CDCl<sub>3</sub>, <sup>13</sup>C

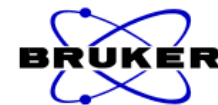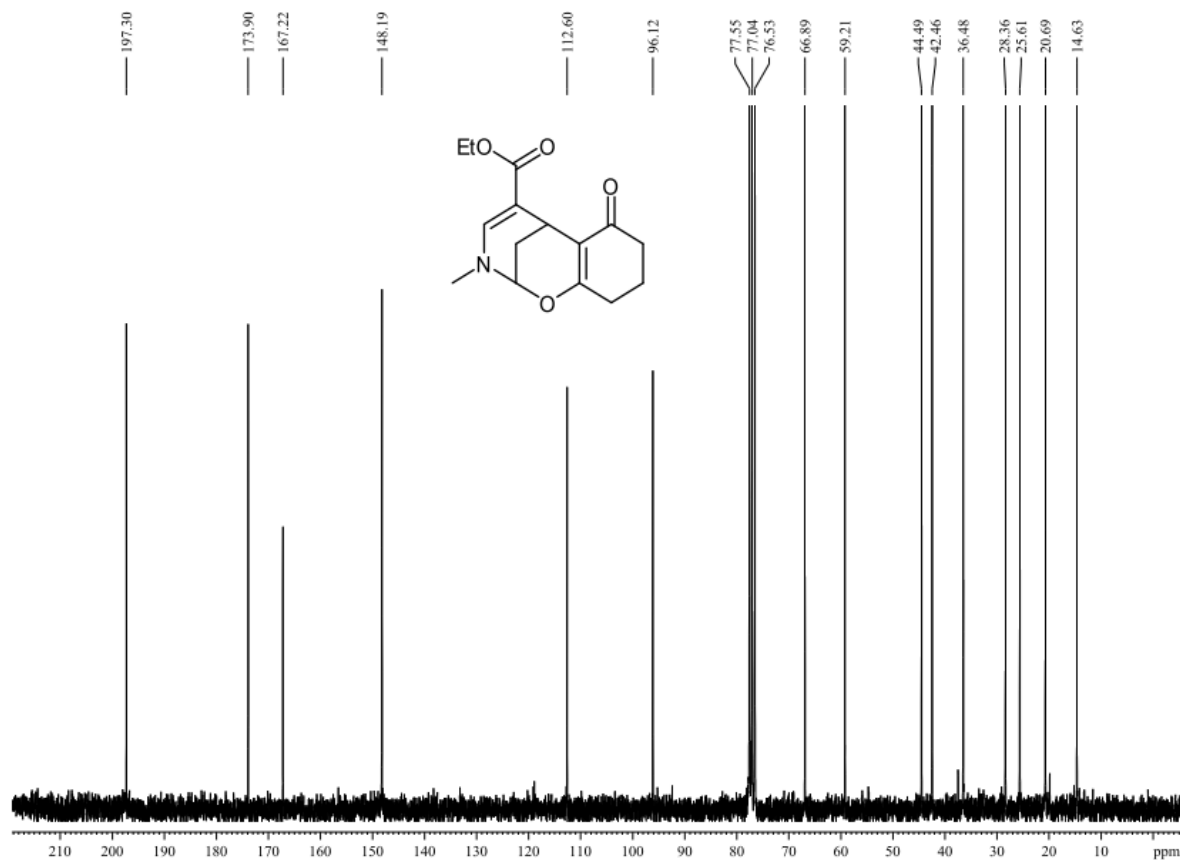

Current Data Parameters  
NAME 110712.208  
EXPNO 10  
PROCNO 1

F2 - Acquisition Parameters  
Date\_ 20110713  
Time 6.08  
INSTRUM spect  
PROBHD 5 mm PABBO BB-  
PULPROG zgpg30  
TD 65536  
SOLVENT CDCl<sub>3</sub>  
NS 1024  
DS 4  
SWH 15000.000 Hz  
FIDRES 0.228882 Hz  
AQ 2.1845834 sec  
RG 2050  
DW 33.333 usec  
DE 10.00 usec  
TE 297.9 K  
D1 2.00000000 sec  
d11 0.03000000 sec  
DELTA 1.89999998 sec  
TD0 1

===== CHANNEL f1 =====  
NUC1 13C  
P1 10.00 usec  
PL1 -1.00 dB  
SFO1 62.9015280 MHz

===== CHANNEL f2 =====  
CPDPRG2 waltz16  
NUC2 1H  
PCPD2 70.00 usec  
PL12 15.00 dB  
PL13 15.00 dB  
PL2 -2.50 dB  
SFO2 250.1310005 MHz

F2 - Processing parameters  
SI 32768  
SF 62.8952390 MHz  
WDW EM  
SSB 0  
LB 1.00 Hz  
GB 0  
PC 1.40

<sup>13</sup>C NMR spectra for compound 6c

Kiamehr 22-2 1H CDCl3

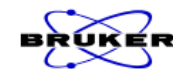

Current Data Parameters  
NAME 110303.u340 mk 22-2  
EXPNO 10  
PROCNO 1

F2 - Acquisition Parameters  
Date\_ 20110303  
Time 14.55  
INSTRUM spect  
PROBHD 5 mm PABBO BB-  
PULPROG zg30  
TD 65536  
SOLVENT CDCl3  
NS 16  
DS 2  
SWH 6188.119 Hz  
FIDRES 0.094423 Hz  
AQ 5.2953587 sec  
RG 90.5  
DW 80.800 usec  
DE 10.00 usec  
TE 298.2 K  
D1 1.00000000 sec  
TD0 1

===== CHANNEL f1 =====  
NUC1 1H  
P1 10.00 usec  
PL1 0.00 dB  
PL1W 11.25325108 W  
SFO1 300.1318534 MHz

F2 - Processing parameters  
SI 32768  
SF 300.1300130 MHz  
WDW EM  
SSB 0  
LB 0.30 Hz  
GB 0  
PC 1.00

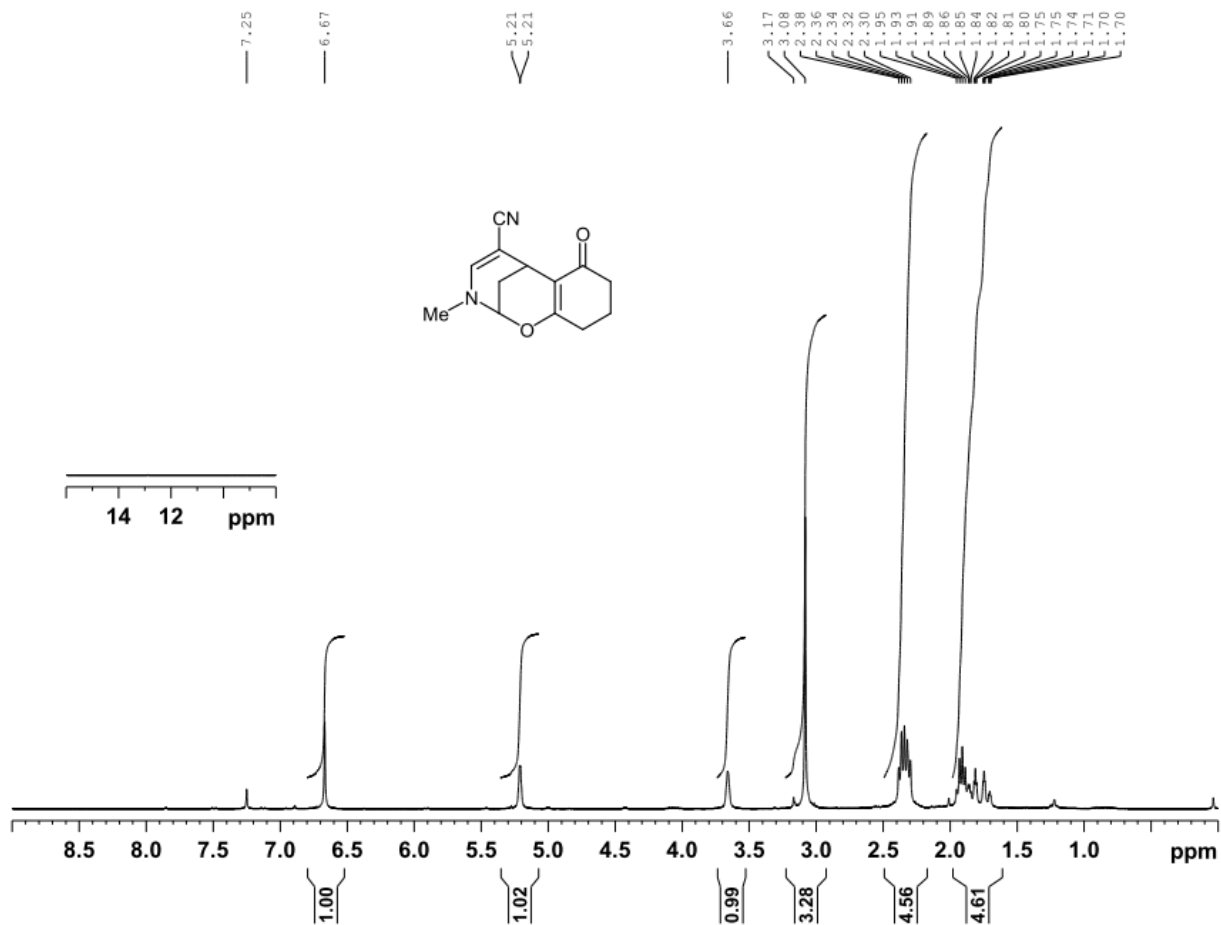

<sup>1</sup>H NMR spectra for compound 6d

Kiamehr 22-2 13C CDCl3

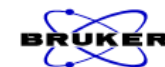

Current Data Parameters  
 NAME 110304.214 mk 22-2 C  
 EXPNO 10  
 PROCNO 1

F2 - Acquisition Parameters  
 Date\_ 20110305  
 Time 13.44  
 INSTRUM spect  
 PROBHD 5 mm PABBO BB-  
 PULPROG zgpg30  
 TD 65536  
 SOLVENT CDCl3  
 NS 1024  
 DS 4  
 SWH 15000.000 Hz  
 FIDRES 0.228882 Hz  
 AQ 2.1845834 sec  
 RG 2050  
 DW 33.333 usec  
 DE 10.00 usec  
 TE 297.9 K  
 D1 2.00000000 sec  
 d11 0.03000000 sec  
 DELTA 1.89999998 sec  
 TD0 1

===== CHANNEL f1 =====  
 NUC1 13C  
 P1 10.00 usec  
 PL1 -1.00 dB  
 SFO1 62.9015280 MHz

===== CHANNEL f2 =====  
 CPDPRG2 waltz16  
 NUC2 1H  
 PCPD2 70.00 usec  
 PL12 15.00 dB  
 PL13 15.00 dB  
 PL2 -2.50 dB  
 SFO2 250.1310005 MHz

F2 - Processing parameters  
 SI 32768  
 SF 62.8952429 MHz  
 WDW EM  
 SSB 0  
 LB 1.00 Hz  
 GB 0  
 PC 1.40

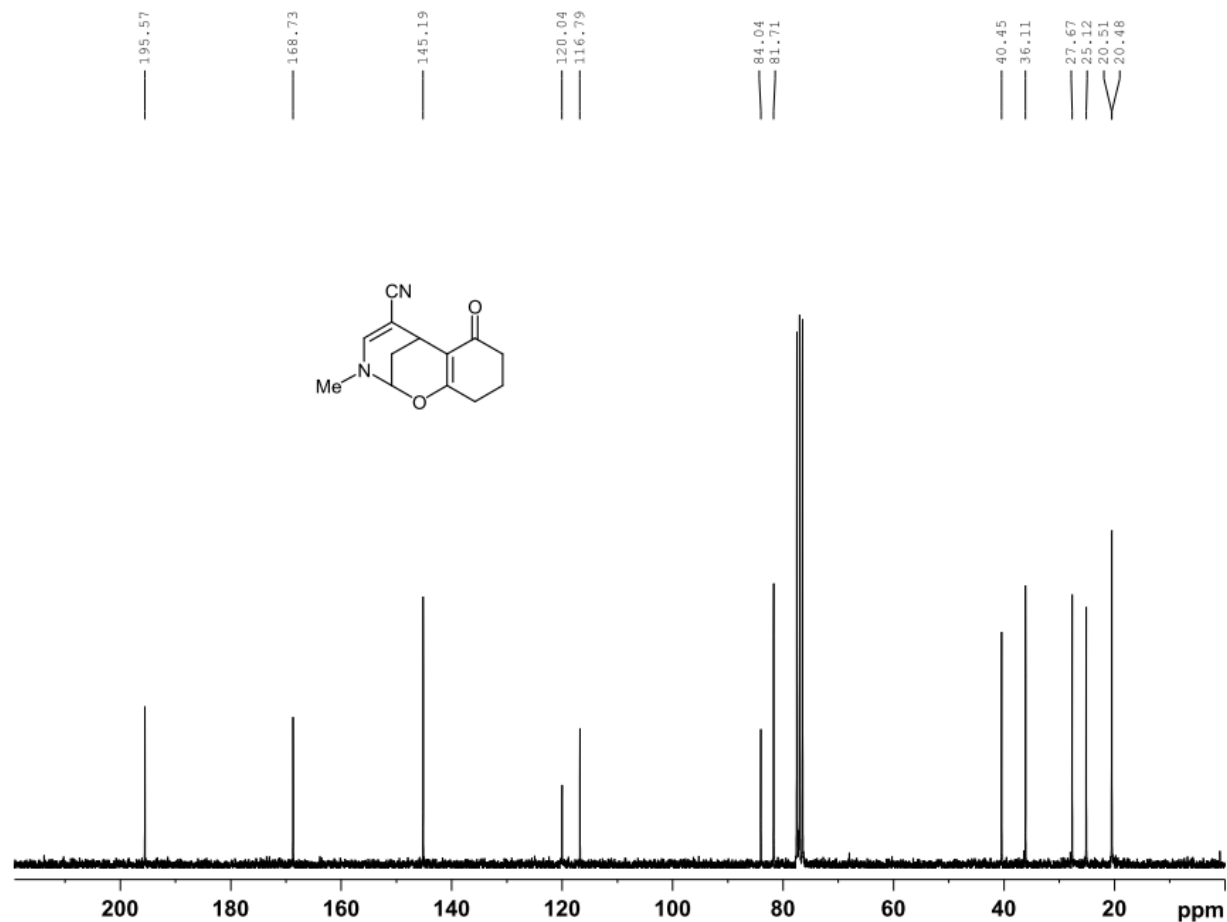

<sup>13</sup>C NMR spectra for compound 6d

Kiamehr 24 1H CDCl3

7.42  
7.25

5.62

5.28

4.55

3.88

3.85

3.82

3.79

3.76

3.73

3.38

3.35

3.32

3.29

3.26

3.23

2.41

2.38

2.36

2.33

2.31

2.28

2.16

1.94

1.92

1.89

1.87

1.86

1.85

1.81

1.76

1.73

1.72

1.71

1.70

1.69

1.68

1.67

1.66

1.65

1.64

1.63

1.62

1.61

1.60

1.59

1.58

1.57

1.56

1.55

1.54

1.53

1.52

1.51

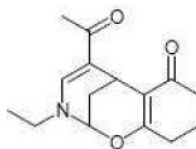

14 12 ppm

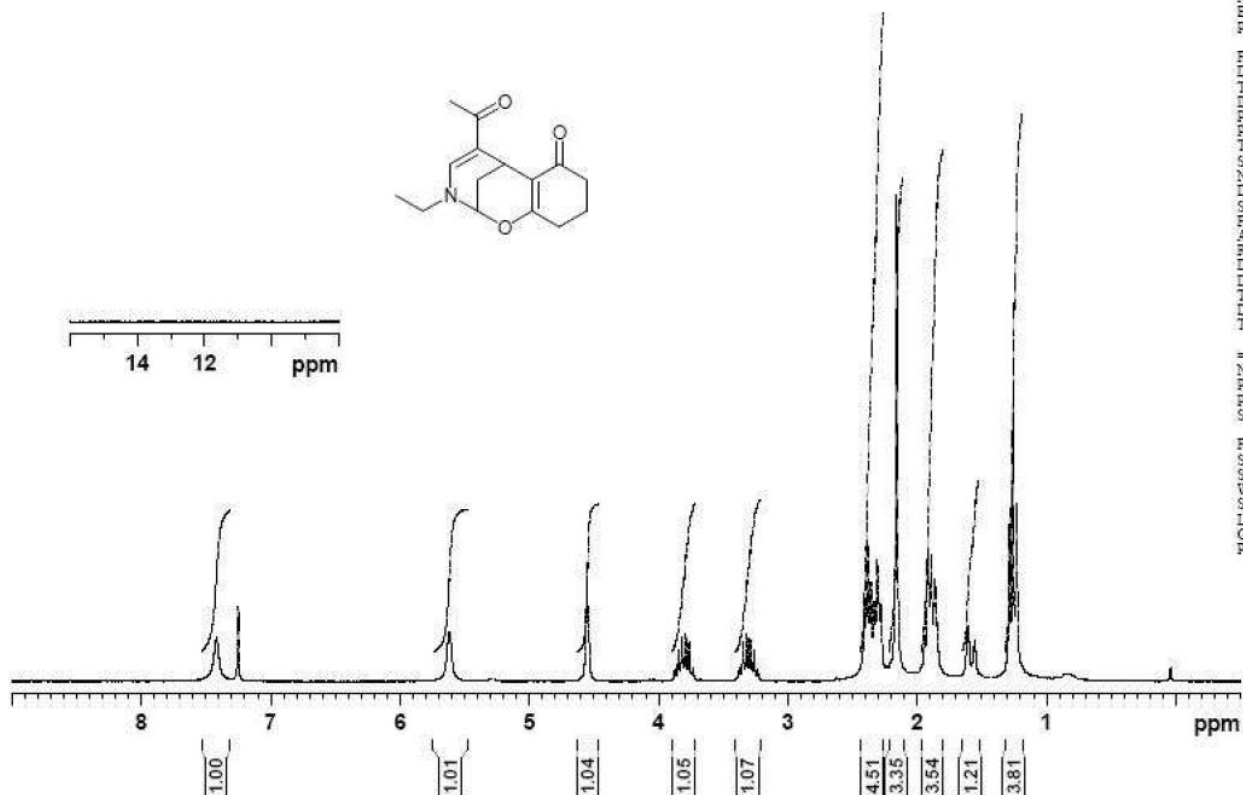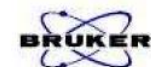

Current Data Parameters  
NAME 110325.201 mk 24  
EXPNO 10  
PROCNO 1

F2 - Acquisition Parameters  
Date\_ 20110325  
Time 9.45  
DISTRUM spect  
PROBHD 5 mm PABBO BB-  
PULPROG zg30  
TD 65536  
SOLVENT CDCl3  
NS 16  
DS 2  
SWH 5165.289 Hz  
FIDRES 0.078816 Hz  
AQ 6.3439350 sec  
RG 512  
DW 96.800 usec  
DE 10.00 usec  
TE 298.1 K  
D1 1.00000000 sec  
TD0 1

===== CHANNEL f1 =====  
NUC1 1H  
P1 10.00 usec  
PL1 -2.50 dB  
SFO1 250.1315447 MHz

F2 - Processing parameters  
SI 32768  
SF 250.1300029 MHz  
WDW EM  
SSB 0  
LB 0.30 Hz  
GB 0  
PC 1.00

<sup>1</sup>H NMR spectra for compound 6e

Kiamehr 24 13C CDCl3

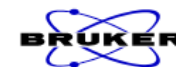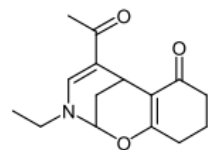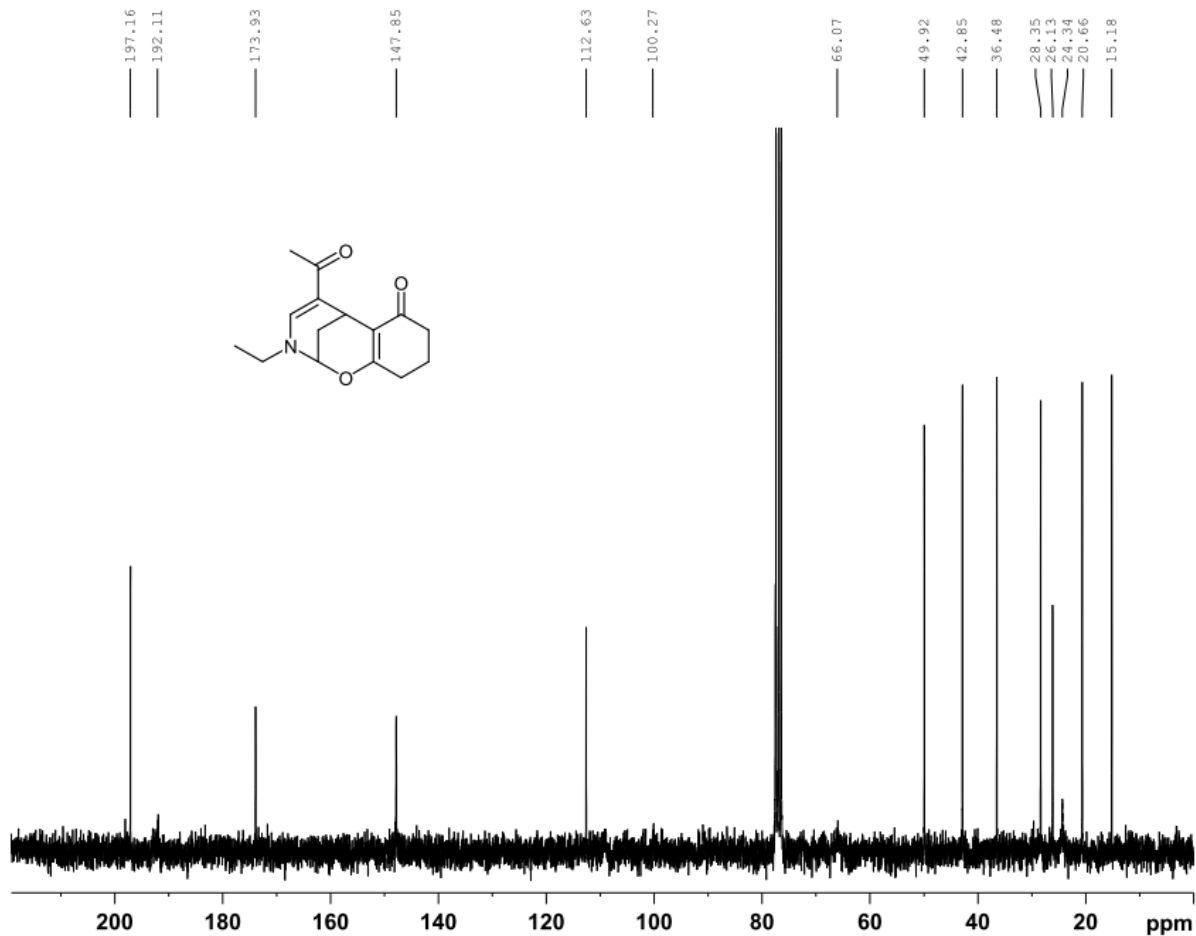

Current Data Parameters  
NAME 110328.205 mk 24 C  
EXPNO 10  
PROCNO 1

F2 - Acquisition Parameters  
Date 20110328  
Time 13.29  
INSTRUM spect  
PROBHD 5 mm PABBO BB-  
PULPROG zgpg30  
TD 65536  
SOLVENT CDCl3  
NS 1024  
DS 4  
SWH 15000.000 Hz  
FIDRES 0.228882 Hz  
AQ 2.1845834 sec  
RG 2050  
DW 33.333 usec  
DE 10.00 usec  
TE 298.0 K  
D1 2.0000000 sec  
d11 0.0300000 sec  
DELTA 1.89999998 sec  
TD0 1

===== CHANNEL f1 =====  
NUC1 13C  
P1 10.00 usec  
PL1 -1.00 dB  
SFO1 62.9015280 MHz

===== CHANNEL f2 =====  
CPDPRG2 waltz16  
NUC2 1H  
PCPD2 70.00 usec  
PL12 15.00 dB  
PL13 15.00 dB  
PL2 -2.50 dB  
SFO2 250.1310005 MHz

F2 - Processing parameters  
SI 32768  
SF 62.8952402 MHz  
WDW EM  
SSB 0  
LB 1.00 Hz  
GB 0  
PC 1.40

<sup>13</sup>C NMR spectra for compound 6e

Kiamehr, KM-92, CDCl<sub>3</sub>, 1H

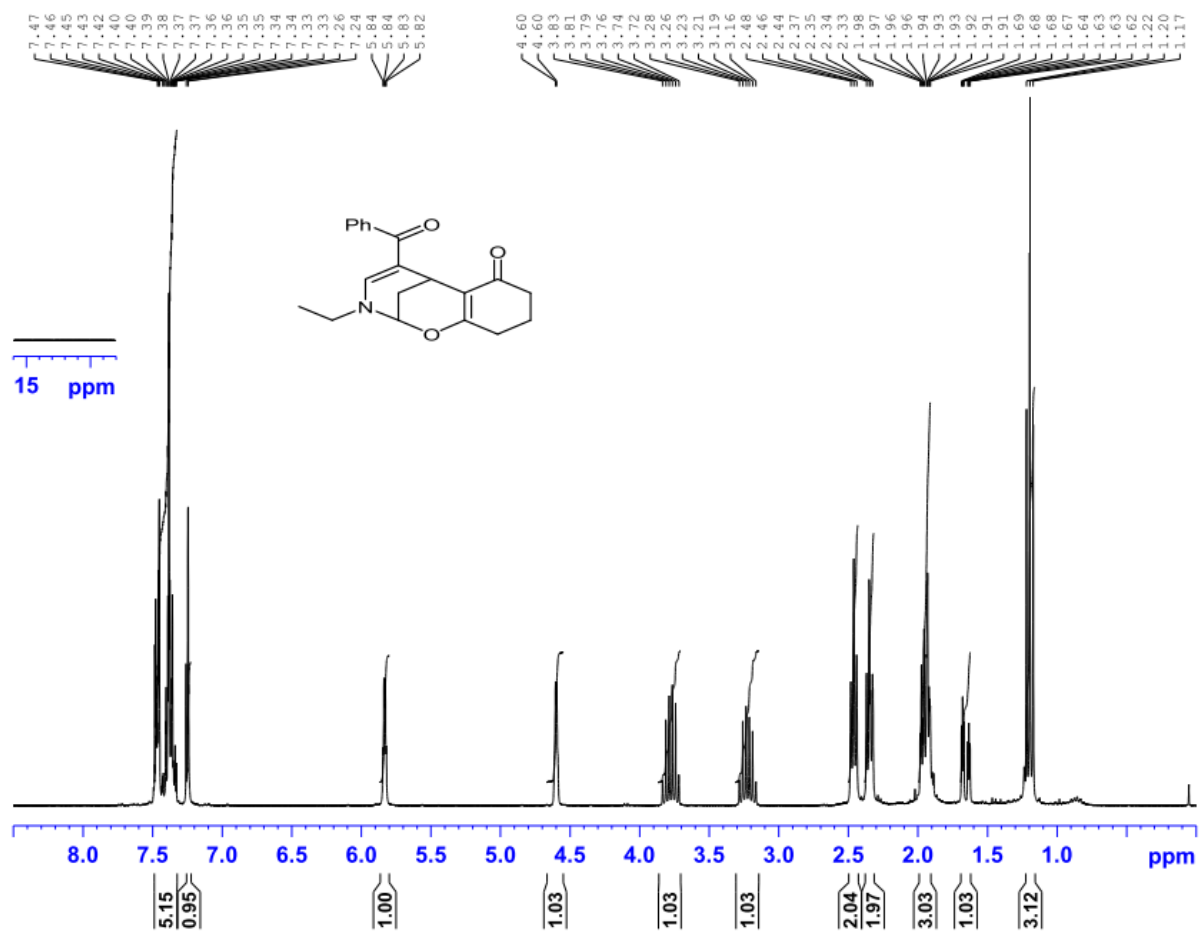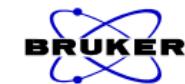

Current Data Parameters  
NAME 110708.u320 mk 92  
EXPNO 10  
PROCNO 1

F2 - Acquisition Parameters  
Date\_ 20110708  
Time 12.36  
INSTRUM spect  
PROBHD 5 mm PABBO BB-  
PULPROG zg30  
TD 65536  
SOLVENT CDCl<sub>3</sub>  
NS 16  
DS 2  
SWH 6188.119 Hz  
FIDRES 0.094423 Hz  
AQ 5.2953587 sec  
RG 90.5  
DW 80.800 usec  
DE 10.00 usec  
TE 298.2 K  
D1 1.00000000 sec  
TD0 1

===== CHANNEL f1 =====  
NUC1 1H  
P1 10.00 usec  
PL1 0.00 dB  
PL1W 11.25325108 W  
SFO1 300.1318534 MHz

F2 - Processing parameters  
SI 32768  
SF 300.1300092 MHz  
WDW EM  
SSB 0  
LB 0.30 Hz  
GB 0  
PC 1.00

<sup>1</sup>H NMR spectra for compound 6f

Kiamehr, KM-92, CDCl<sub>3</sub>, <sup>13</sup>C

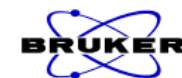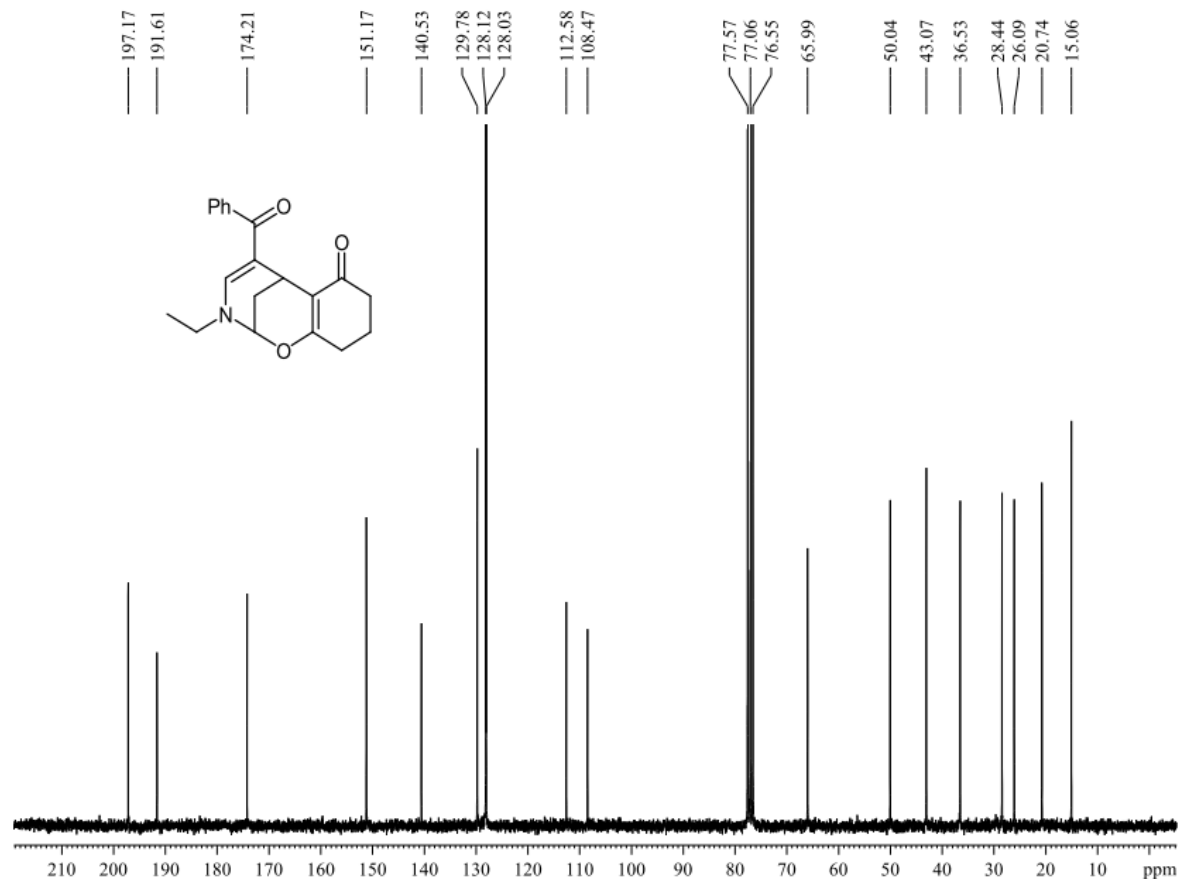

Current Data Parameters  
 NAME 110711.202 mk 92 C  
 EXPNO 10  
 PROCNO 1

F2 - Acquisition Parameters  
 Date\_ 20110712  
 Time 7.22  
 INSTRUM spect  
 PROBHD 5 mm PABBO BB-  
 PULPROG zgpg30  
 TD 65536  
 SOLVENT CDCl<sub>3</sub>  
 NS 1024  
 DS 4  
 SWH 15000.000 Hz  
 FIDRES 0.228882 Hz  
 AQ 2.1845834 sec  
 RG 1440  
 DW 33.333 usec  
 DE 10.00 usec  
 TE 297.9 K  
 D1 2.00000000 sec  
 d11 0.03000000 sec  
 DELTA 1.89999998 sec  
 TD0 1

===== CHANNEL f1 =====  
 NUC1 <sup>13</sup>C  
 P1 10.00 usec  
 PL1 -1.00 dB  
 SFO1 62.9015280 MHz

===== CHANNEL f2 =====  
 CPDPRG2 waltz16  
 NUC2 <sup>1</sup>H  
 PCPD2 70.00 usec  
 PL12 15.00 dB  
 PL13 15.00 dB  
 PL2 -2.50 dB  
 SFO2 250.1310005 MHz

F2 - Processing parameters  
 SI 32768  
 SF 62.8952390 MHz  
 WDW EM  
 SSB 0  
 LB 1.00 Hz  
 GB 0  
 PC 1.40

<sup>13</sup>C NMR spectra for compound 6f

Kiamehr, 32-KM, CDCl<sub>3</sub>, 1H

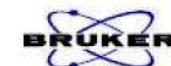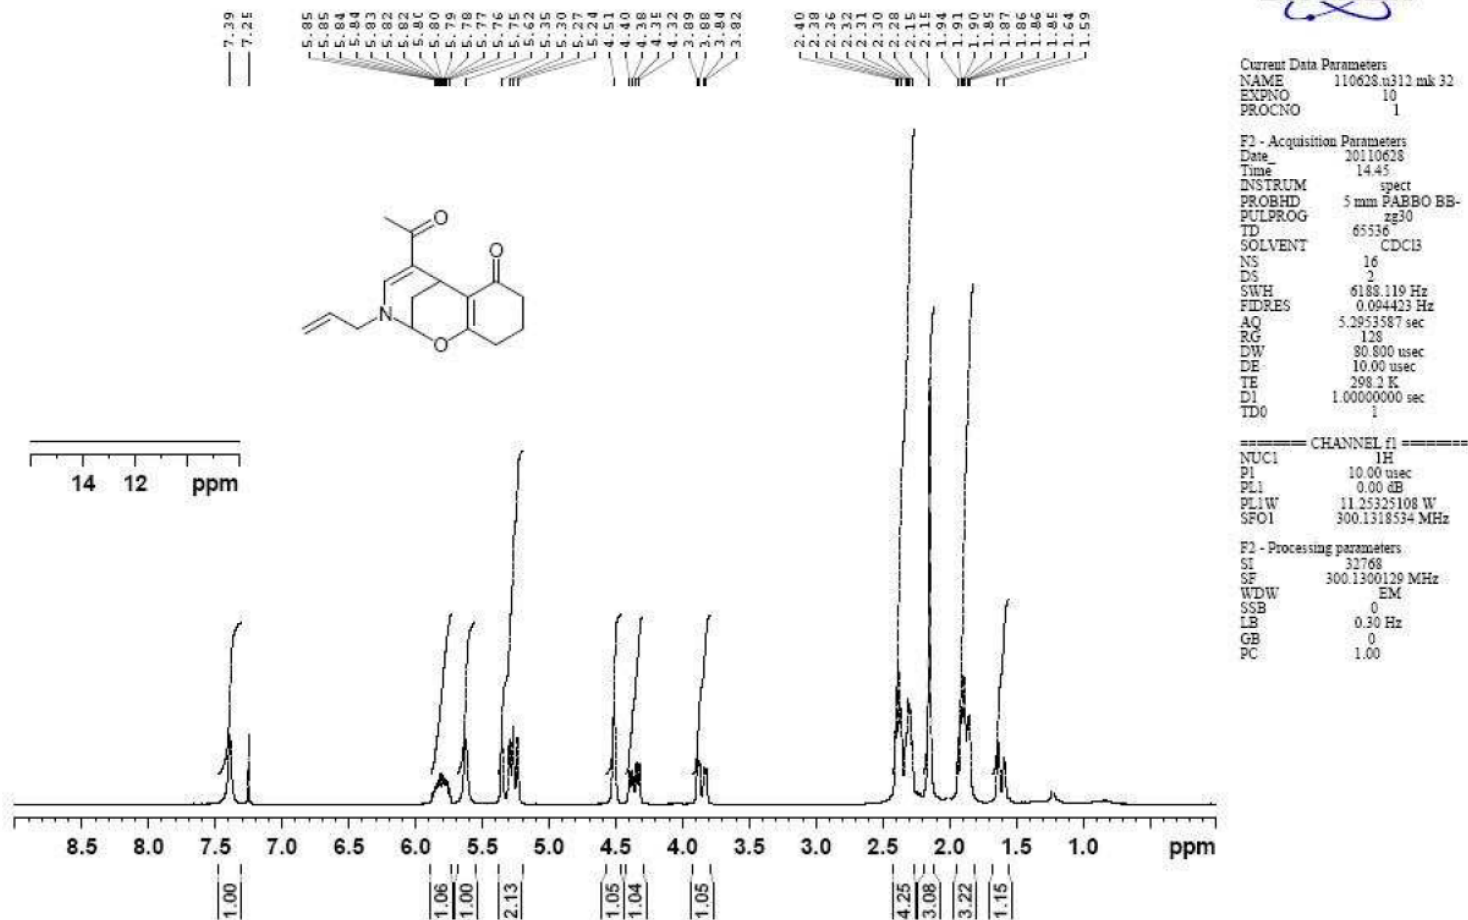



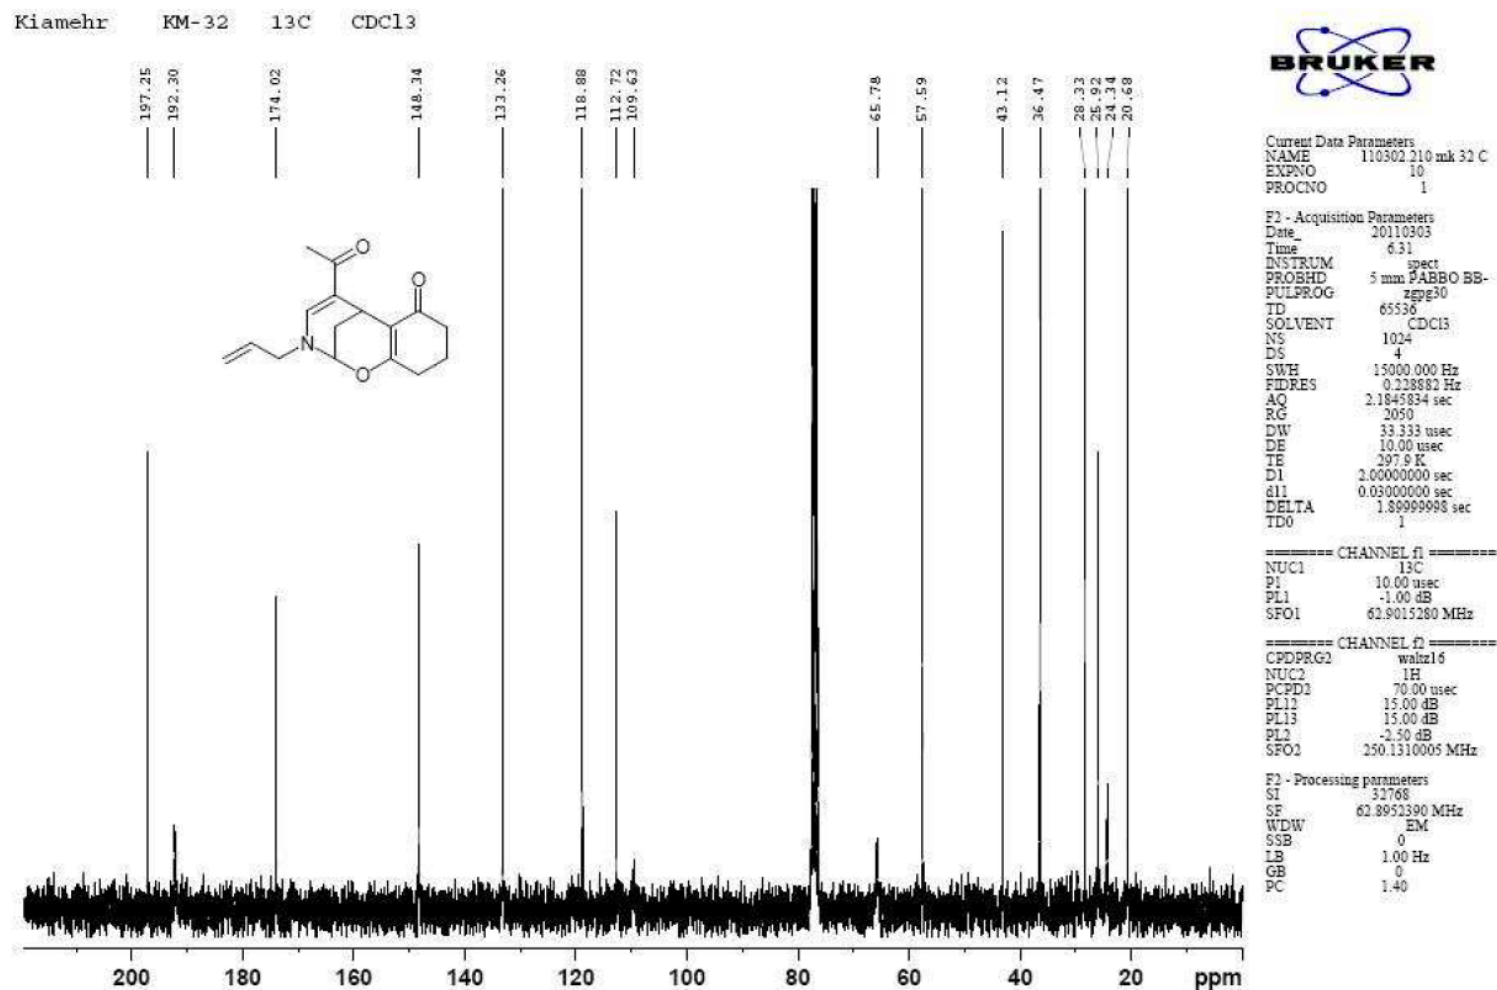

$^{13}\text{C}$  NMR spectra for compound 6g

Kiammehr, 87-KM, CDCl<sub>3</sub>, 1H

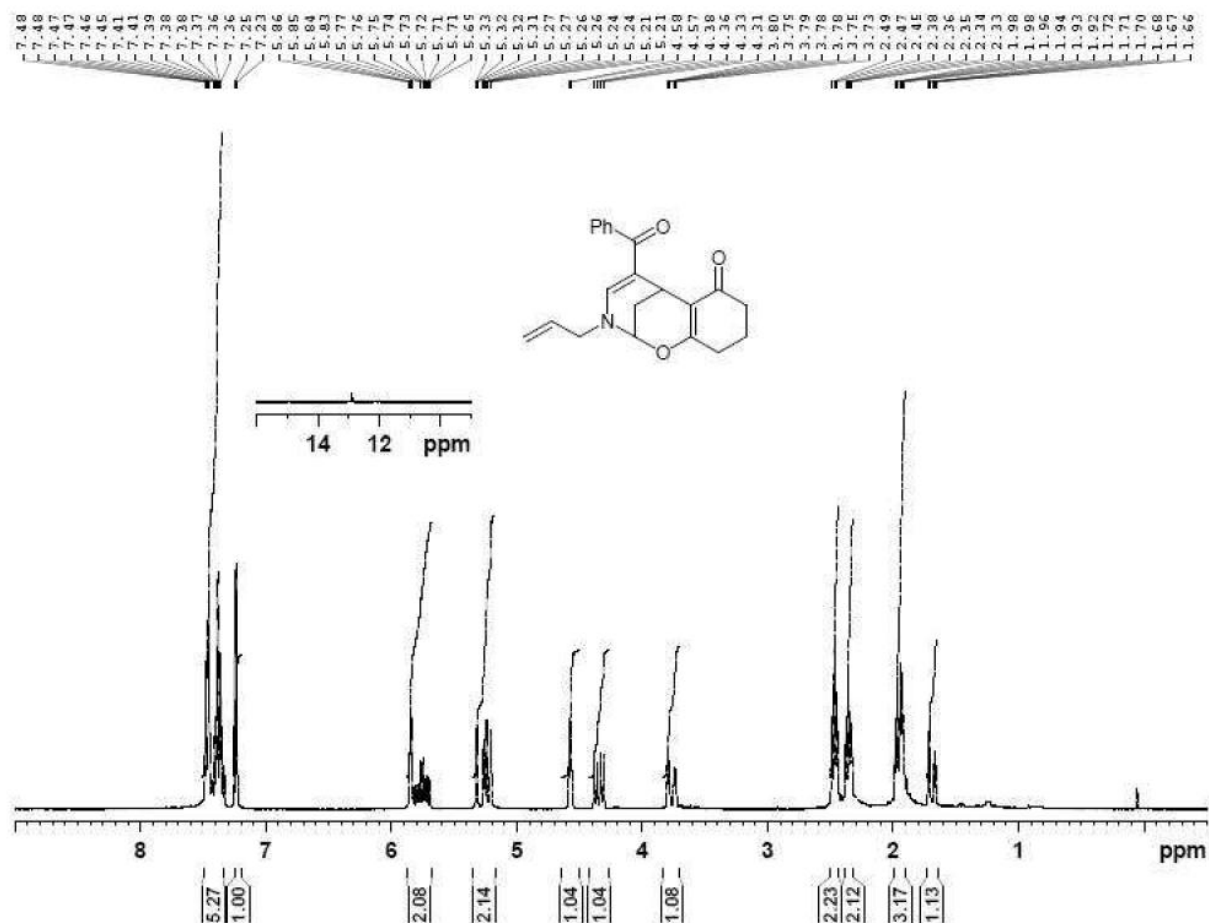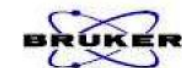

Current Data Parameters  
 NAME 110628 u316 mk 87  
 EXPNO 10  
 PROCNO 1

F2 - Acquisition Parameters  
 Date\_ 20110628  
 Time 15.10  
 INSTRUM spect  
 PROBHD 5 mm F4BBO BB-  
 PULPROG zg30  
 TD 65536  
 SOLVENT CDCl<sub>3</sub>  
 NS 16  
 DS 2  
 SWH 6188.119 Hz  
 FIDRES 0.004423 Hz  
 AQ 5.2953587 sec  
 RG 161  
 DW 80.800 usec  
 DE 10.00 usec  
 TE 298.2 K  
 D1 1.00000000 sec  
 TDO 1

===== CHANNEL f1 =====  
 NUC1 1H  
 P1 10.00 usec  
 PL1 0.00 dB  
 PL1W 11.25325108 W  
 SFO1 300.1318334 MHz

F2 - Processing parameters  
 SI 32768  
 SF 300.1300114 MHz  
 WDW EM  
 SSB 0  
 LB 0.30 Hz  
 GB 0  
 PC 1.00

<sup>1</sup>H NMR spectra for compound 6h

Kiamehr KM-87 13C CDCl3

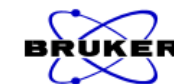

Current Data Parameters  
 NAME 110513.204 mk 87 C  
 EXPNO 10  
 PROCNO 1

F2 - Acquisition Parameters  
 Date 20110513  
 Time 17.58  
 INSTRUM spect  
 PROBHD 5 mm PABBO BB-  
 PULPROG zgpg30  
 TD 65536  
 SOLVENT CDCl3  
 NS 1024  
 DS 4  
 SWH 15000.000 Hz  
 FIDRES 0.228882 Hz  
 AQ 2.1845834 sec  
 RG 2050  
 DW 33.333 usec  
 DE 10.00 usec  
 TE 300.0 K  
 D1 2.00000000 sec  
 d11 0.03000000 sec  
 DELTA 1.89999998 sec  
 TD0 1

===== CHANNEL f1 =====  
 NUC1 13C  
 P1 10.00 usec  
 PL1 -1.00 dB  
 SFO1 62.9015280 MHz

===== CHANNEL f2 =====  
 CPDPRG2 waltz16  
 NUC2 1H  
 PCPD2 70.00 usec  
 PL12 15.00 dB  
 PL13 15.00 dB  
 PL2 -2.50 dB  
 SFO2 250.1310005 MHz

F2 - Processing parameters  
 SI 32768  
 SF 62.8952411 MHz  
 WDW EM  
 SSB 0  
 LB 1.00 Hz  
 GB 0  
 PC 1.40

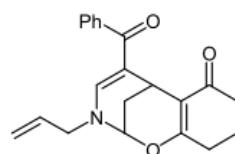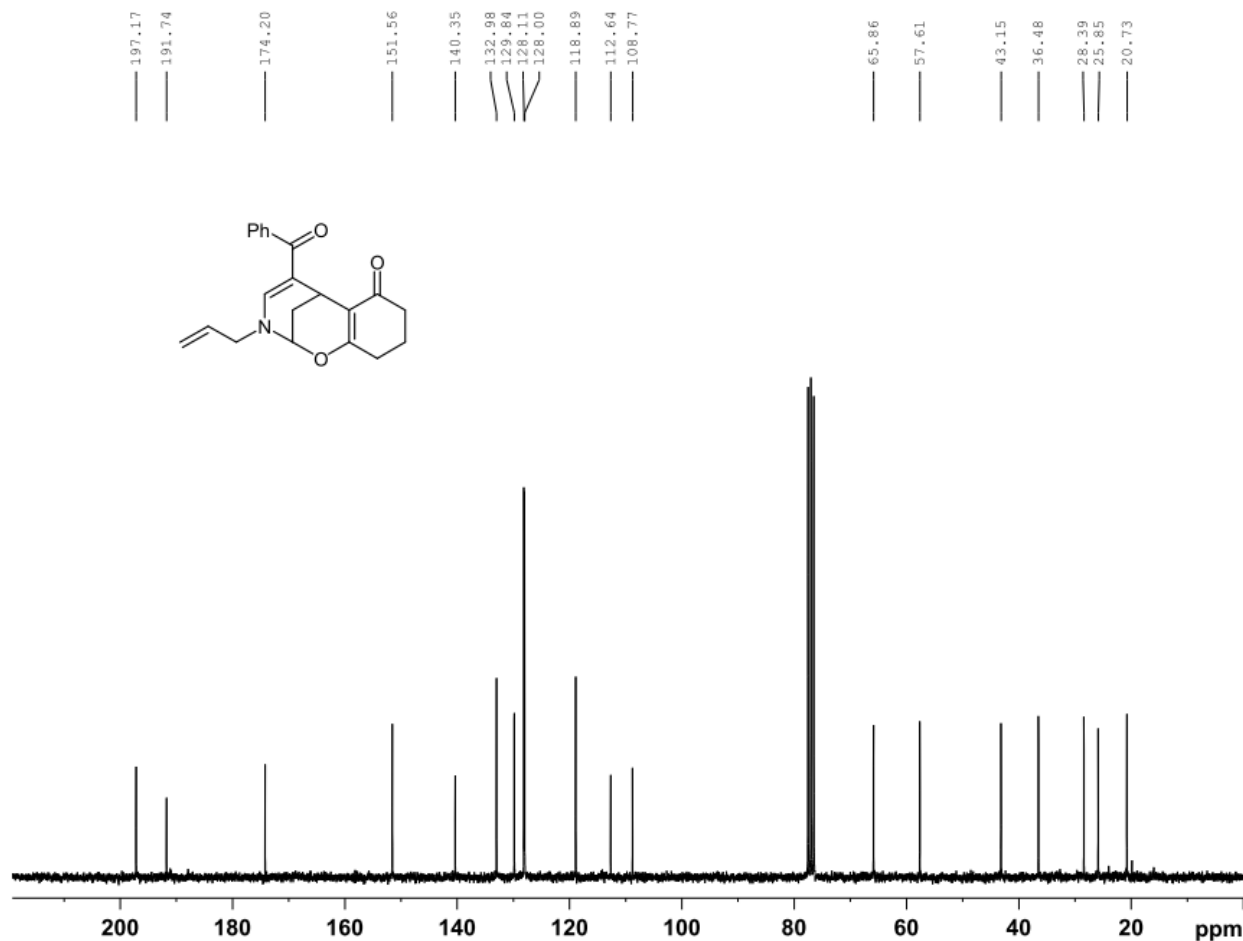

<sup>13</sup>C NMR spectra for compound 6h

Kiamehr 44 1H CDCl3

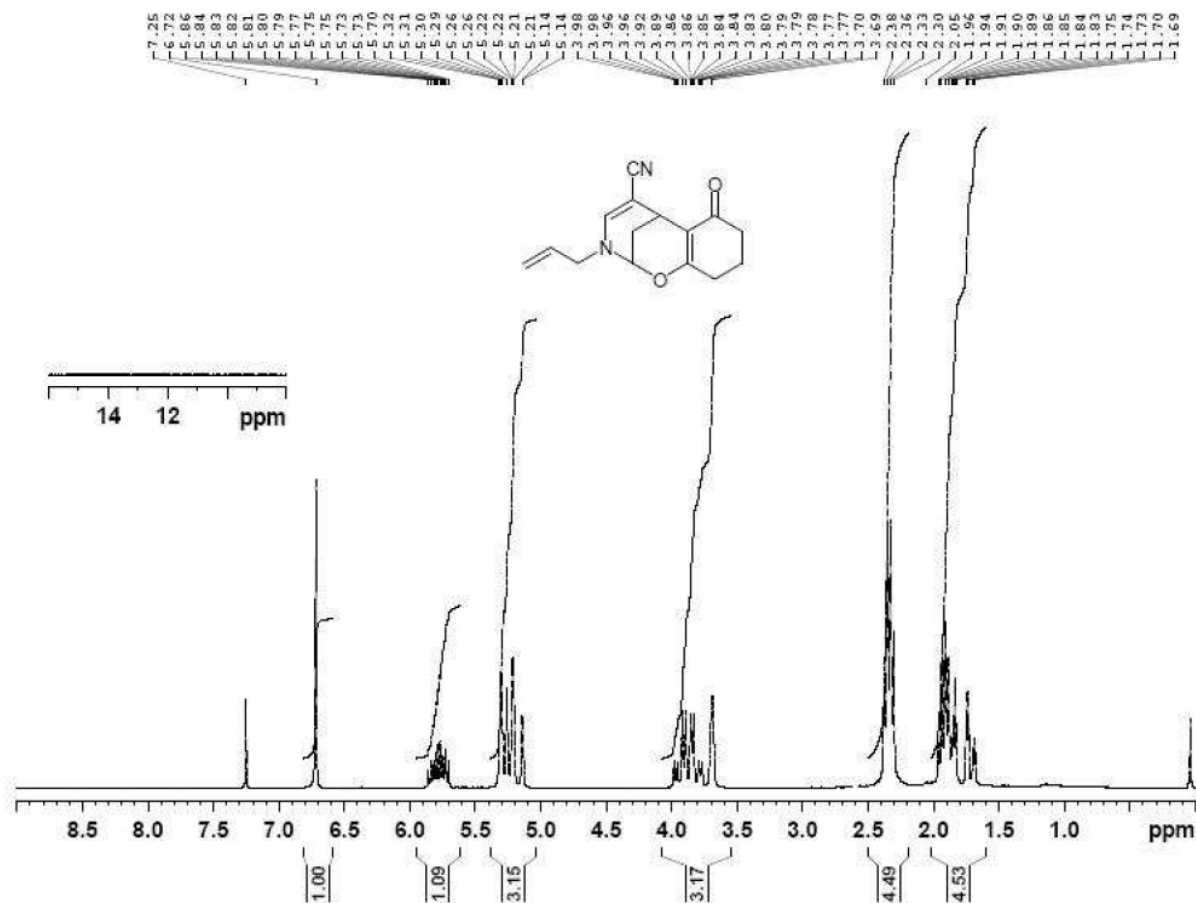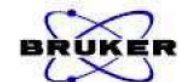

Current Data Parameters  
NAME 110408.205 mk 44  
EXPNO 10  
PROCNO 1

F1 - Acquisition Parameters  
Date\_ 20110408  
Time 9.13  
INSTRUM spect  
PROBHD 5 mm PABBO BB-  
PULPROG zg30  
TD 65536  
SOLVENT CDCl3  
NS 16  
DS 2  
SWH 5165.289 Hz  
FIDRES 0.078816 Hz  
AQ 6.3439350 sec  
RG 322  
DW 96.800 usec  
DE 10.00 usec  
TE 298.1 K  
D1 1.00000000 sec  
TD0 1

===== CHANNEL f1 =====  
NUC1 1H  
P1 10.00 usec  
PL1 -2.50 dB  
SFO1 250.1315447 MHz

F2 - Processing parameters  
SI 32768  
SF 250.1300030 MHz  
WDW EM  
SSB 0  
LB 0.30 Hz  
GB 0  
PC 1.00

<sup>1</sup>H NMR spectra for compound 6i

Kiamehr 44 13C CDC13

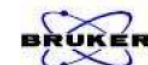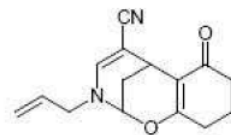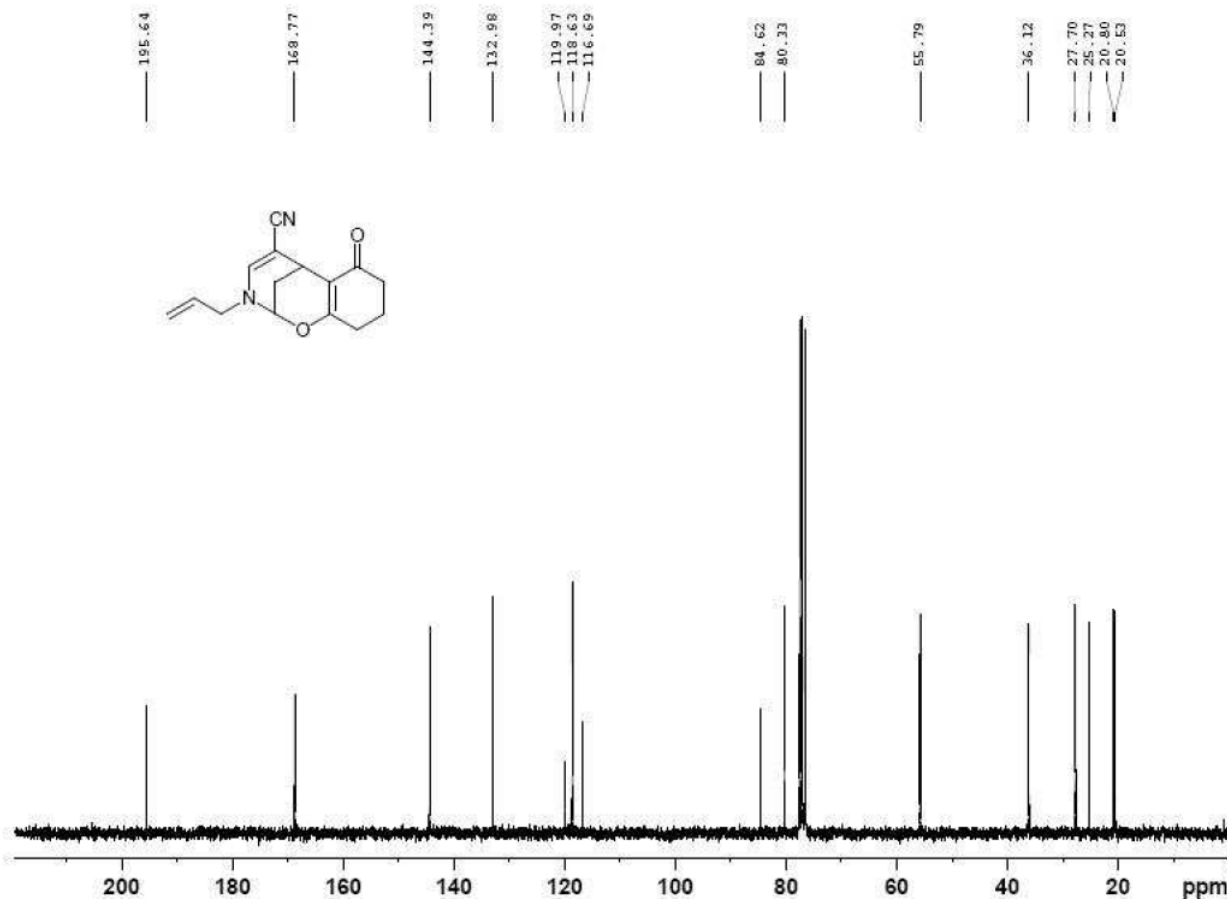

Current Data Parameters  
NAME 110411.205 mk 44 C  
EXPNO 10  
PROCNO 1

F2 - Acquisition Parameters  
Date\_ 20110411  
Time 21.05  
INSTRUM spect  
PROBHD 5 mm PABBO BB-  
PULPROG zgpg30  
TD 65536  
SOLVENT CDC13  
NS 768  
DS 4  
SWH 15000.000 Hz  
FIDRES 0.228882 Hz  
AQ 2.1845834 sec  
RG 2050  
DW 33.333 usec  
DE 10.00 usec  
TE 298.3 K  
D1 2.00000000 sec  
d11 0.03000000 sec  
DELTA 1.89999998 sec  
TD0 1

===== CHANNEL f1 =====  
NUC1 13C  
P1 10.00 usec  
PL1 -1.00 dB  
SFO1 62.9015280 MHz

===== CHANNEL f2 =====  
CPDPRG2 waltz16  
NUC2 1H  
PCPD2 70.00 usec  
PL12 15.00 dB  
PL13 15.00 dB  
PL2 -2.50 dB  
SFO2 250.1310005 MHz

F2 - Processing parameters  
SI 32768  
SF 62.8952420 MHz  
VDW EM  
SSB 0  
LB 1.00 Hz  
GB 0  
PC 1.40

<sup>13</sup>C NMR spectra for compound 6i

Kiamehr, 30-KM, CDCl<sub>3</sub>, 1H

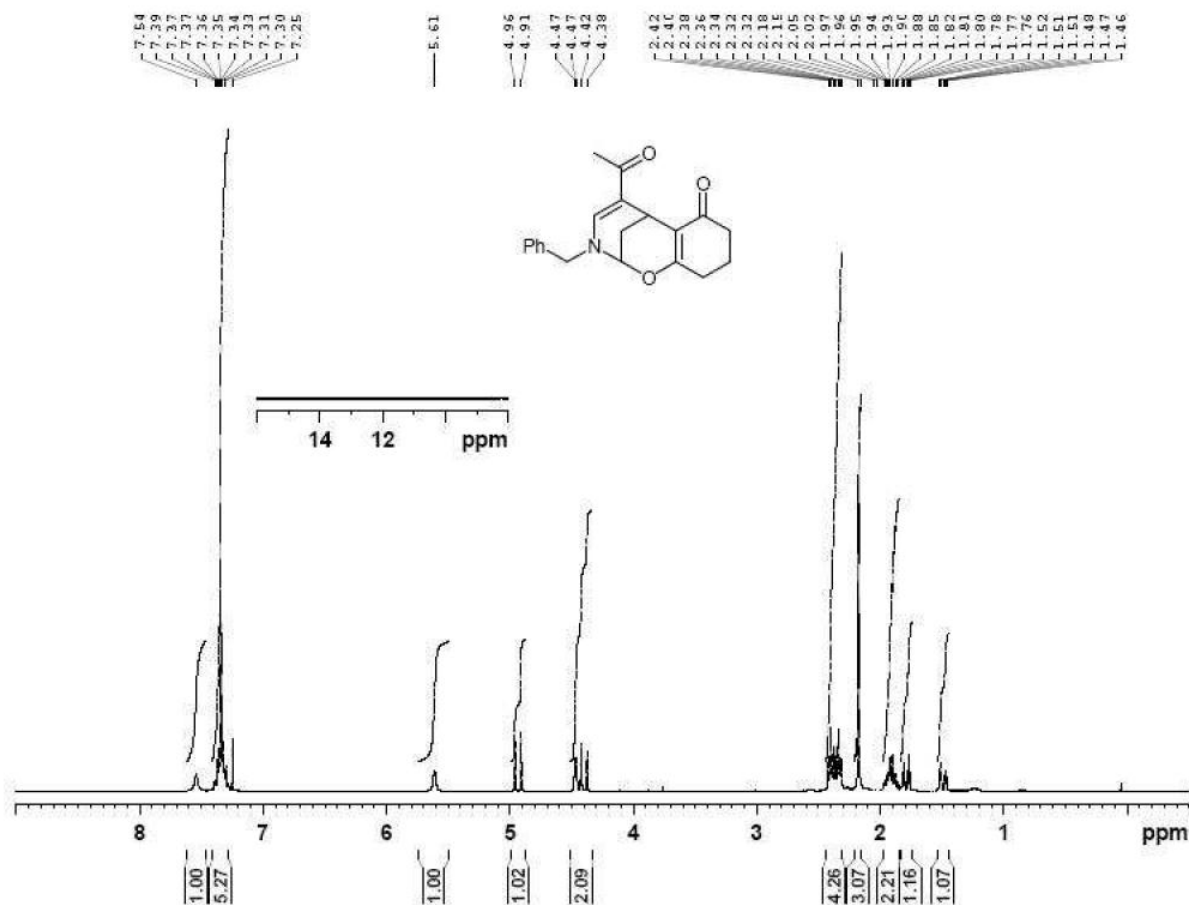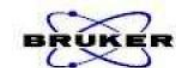

Current Data Parameters  
NAME 110628.m310 mk 30  
EXPNO 10  
PROCNO 1

F2 - Acquisition Parameters  
Date\_ 20110628  
Time 14.32  
INSTRUM spect  
PROBHD 5 mm PABBO BB-  
PULPROG zg30  
TD 65536  
SOLVENT CDCl<sub>3</sub>  
NS 16  
DS 2  
SWH 6188.119 Hz  
FIDRES 0.094433 Hz  
AQ 5.2953587 sec  
RG 128  
DW 80.800 usec  
DE 10.00 usec  
TE 298.2 K  
D1 1.00000000 sec  
TD0 1

===== CHANNEL f1 =====  
NUC1 1H  
P1 10.00 usec  
PL1 0.00 dB  
PL1W 11.25325108 W  
SFO1 300.1318534 MHz

F2 - Processing parameters  
SI 32768  
SF 300.1300118 MHz  
WDW EM  
SSB 0  
LB 0.30 Hz  
GB 0  
PC 1.00

<sup>1</sup>H NMR spectra for compound 6j

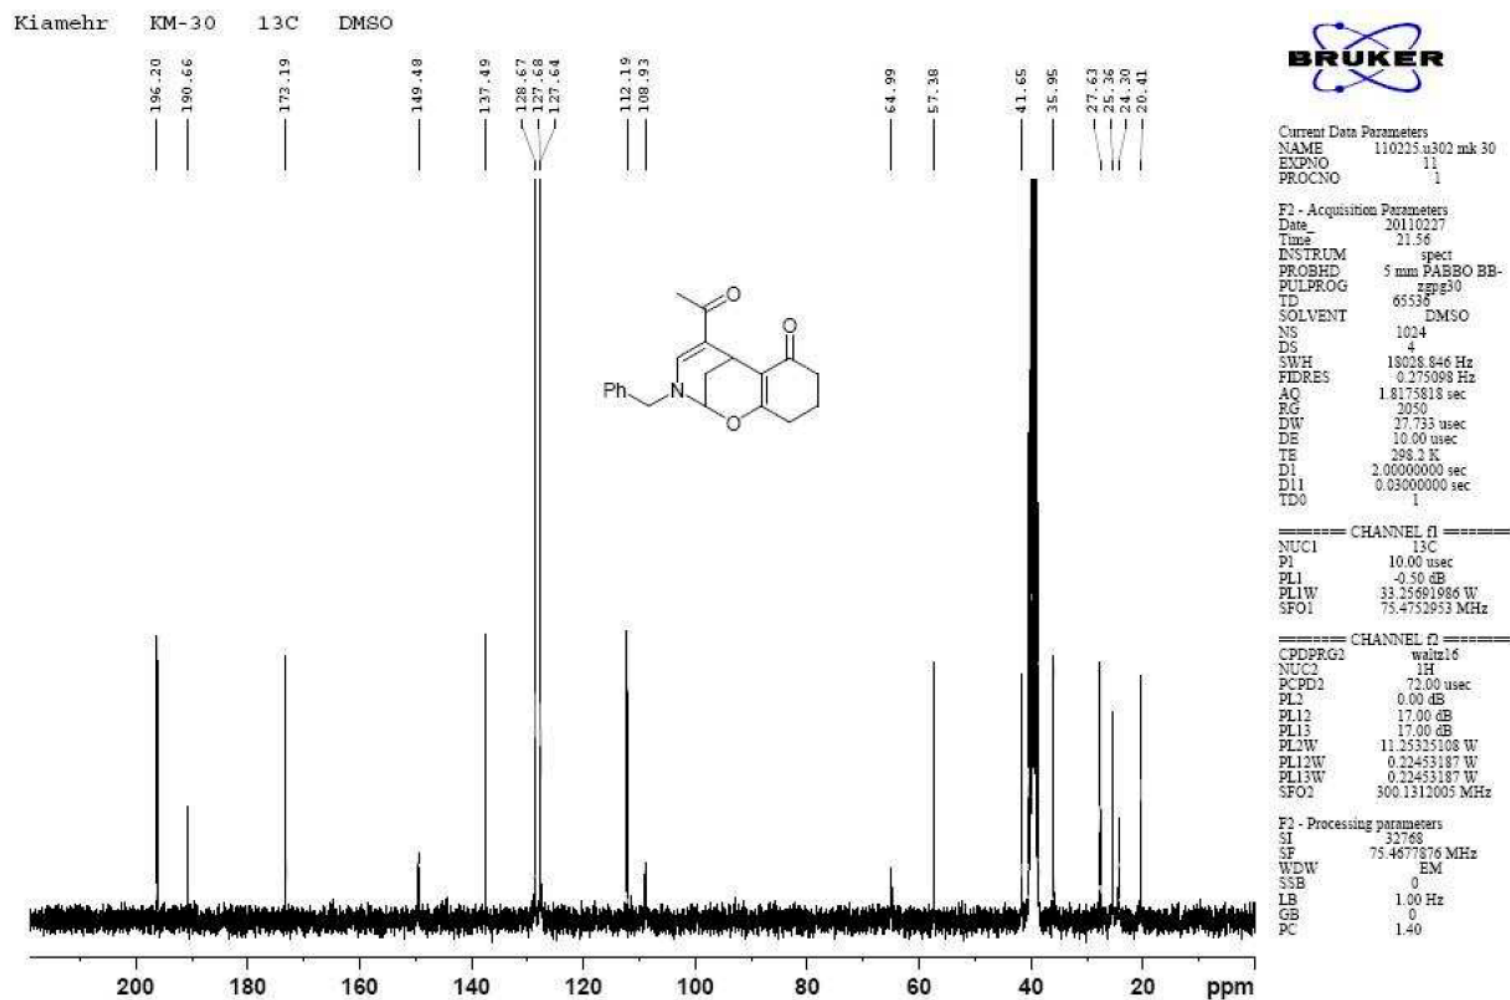

<sup>13</sup>C NMR spectra for compound 6j

Kiamehr, 88-KM, CDCl<sub>3</sub>, 1H

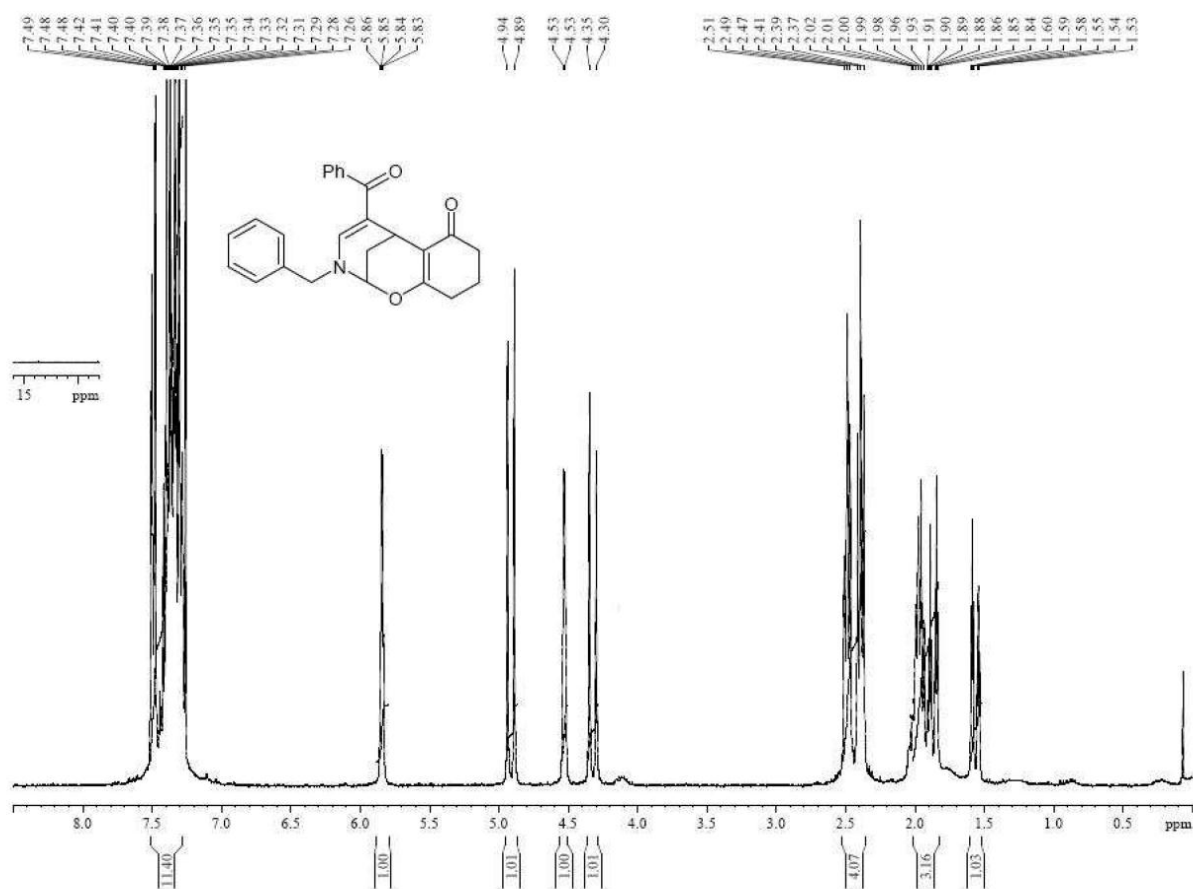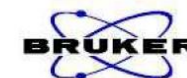

Current Data Parameters  
NAME 110628.u317 mk 88  
EXPNO 10  
PROCNO 1

F2 - Acquisition Parameters  
Date\_ 20110628  
Time 15.17  
INSTRUM spect  
PROBHD 5 mm PABBO BB-  
PULPROG zg30  
TD 65536  
SOLVENT CDCl<sub>3</sub>  
NS 16  
DS 2  
SWH 6188.119 Hz  
FIDRES 0.094423 Hz  
AQ 5.2953587 sec  
RG 161  
DW 80.800 usec  
DE 10.00 usec  
TE 298.2 K  
D1 1.00000000 sec  
TD0 1

===== CHANNEL f1 =====  
NUC1 1H  
P1 10.00 usec  
PL1 0.00 dB  
PL1W 11.25325108 W  
SFO1 300.1318534 MHz

F2 - Processing parameters  
SI 32768  
SF 300.1300086 MHz  
WDW EM  
SSB 0  
LB 0.30 Hz  
GB 0  
PC 1.00

<sup>1</sup>H NMR spectra for compound 6k



Kiamehr 88-KM 13C CDCl3

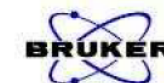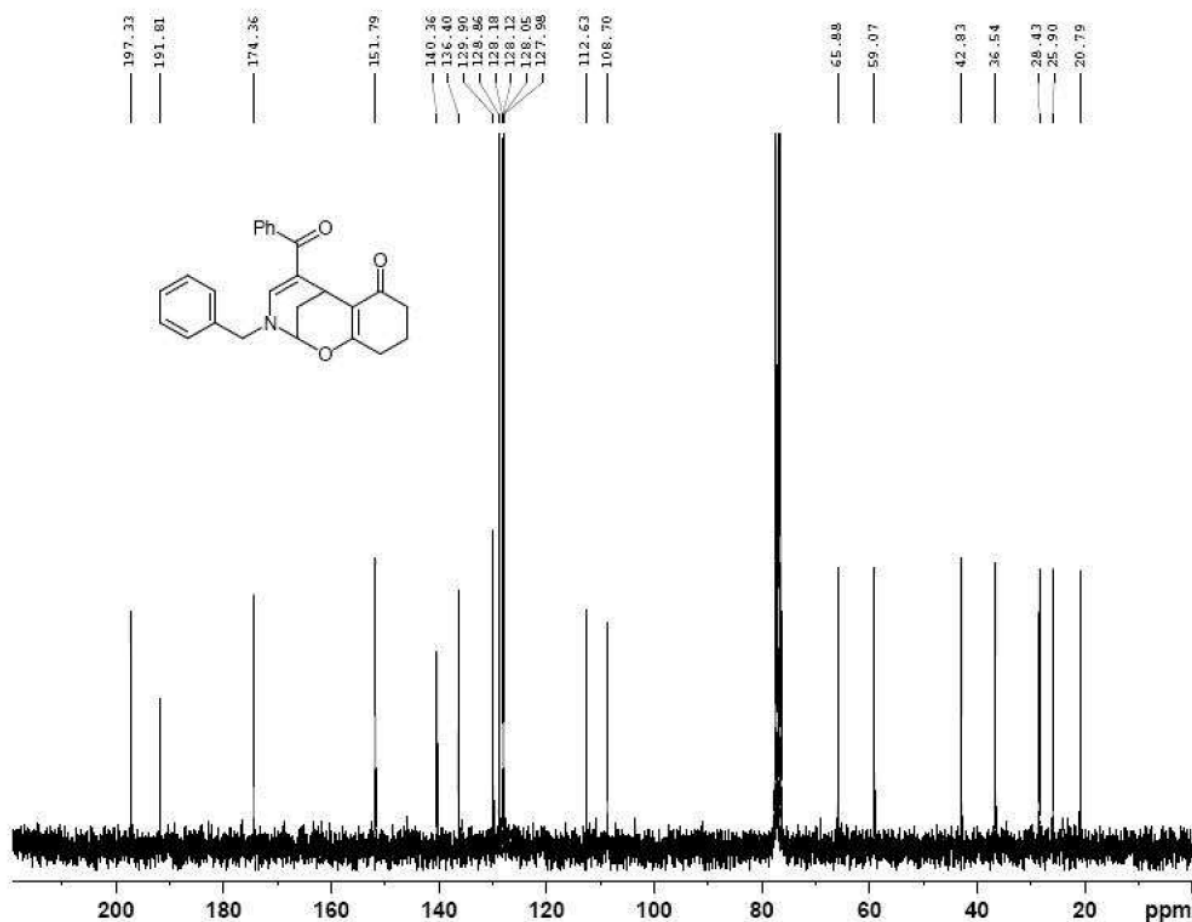

Current Data Parameters  
NAME 110523 206 mk 88 C  
EXPNO 10  
PROCNO 1

F2 - Acquisition Parameters  
Date\_ 20110523  
Time 18.14  
INSTRUM spect  
PROBHD 5 mm PABBO BB-  
PULPROG zgpg30  
TD 65536  
SOLVENT CDCl3  
NS 1024  
DS 4  
SWH 15000.000 Hz  
FIDRES 0.228852 Hz  
AQ 2.1845834 sec  
RG 2050  
DW 33.333 usec  
DE 10.00 usec  
TE 299.3 K  
D1 2.00000000 sec  
d11 0.03000000 sec  
DELTA 1.89999998 sec  
TD0 1

===== CHANNEL f1 =====  
NUC1 13C  
P1 10.00 usec  
PL1 -1.00 dB  
SFO1 62.9015280 MHz

===== CHANNEL f2 =====  
CPDPRG2 waltz16  
NUC2 1H  
PCPD2 70.00 usec  
PL12 15.00 dB  
PL13 15.00 dB  
PL1 -2.50 dB  
SFO2 250.1310005 MHz

F2 - Processing parameters  
SI 32768  
SF 62.8952397 MHz  
WDW EM  
SSB 0  
LB 1.00 Hz  
GB 0  
PC 1.40

<sup>13</sup>C NMR spectra for compound 6k

Kiamehr 41 1H CDCl3

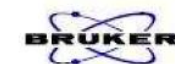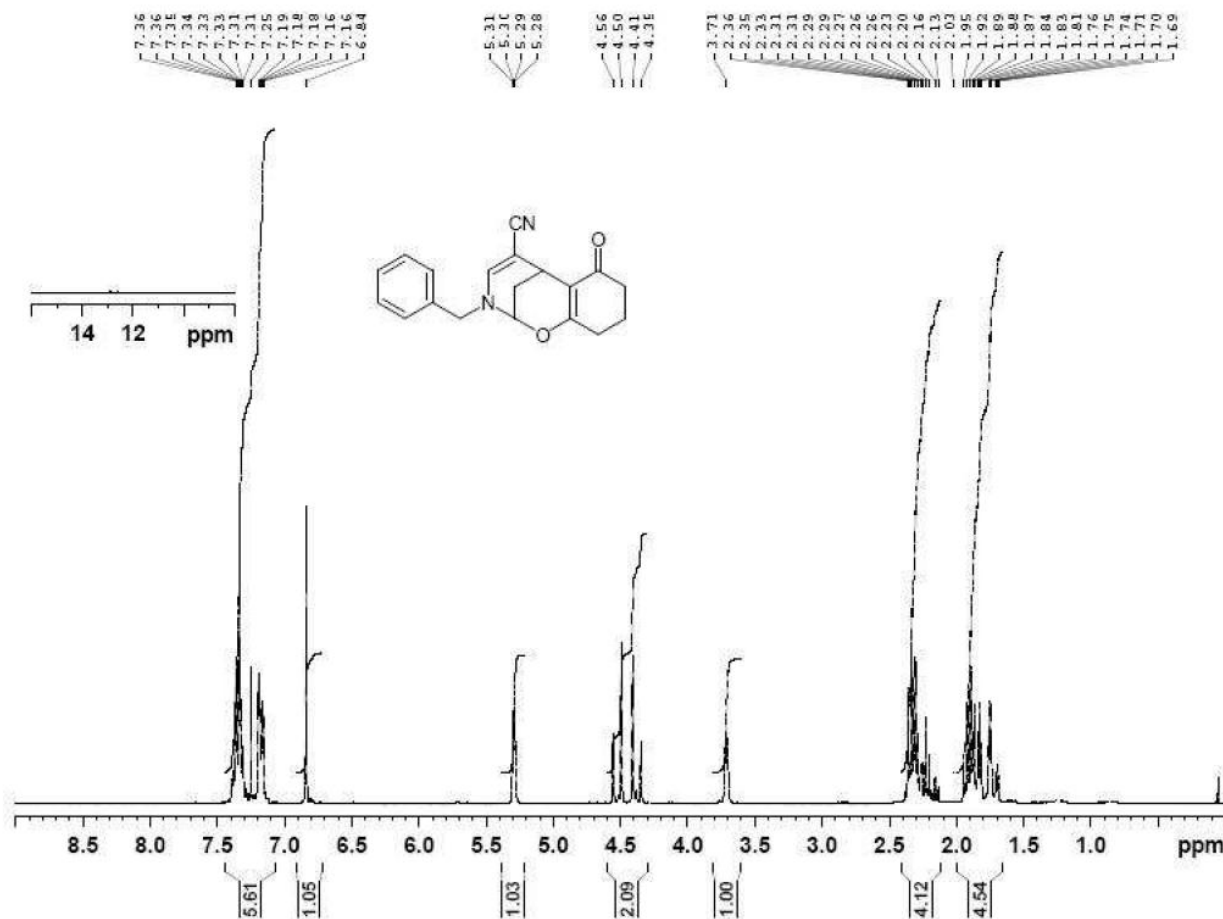

Current Data Parameters  
NAME 110325.203 mk 41  
EXPNO 10  
PROCNO 1

F2 - Acquisition Parameters  
Date\_ 20110325  
Time 9.57  
INSTRUM spect  
PROBHD 5 mm PABBO BB-  
PULPROG zg30  
TD 65536  
SOLVENT CDCl3  
NS 16  
DS 2  
SWH 5165.289 Hz  
FIDRES 0.078816 Hz  
AQ 6.3439350 sec  
RG 575  
DW 96.800 usec  
DE 10.00 usec  
TE 298.1 K  
D1 1.00000000 sec  
TD0 1

===== CHANNEL f1 =====  
NUC1 1H  
P1 10.00 usec  
PL1 -2.50 dB  
SFO1 250.1315447 MHz

F2 - Processing parameters  
SI 32768  
SF 250.1300030 MHz  
WDW EM  
SSB 0  
LB 0.30 Hz  
GB 0  
PC 1.00

<sup>1</sup>H NMR spectra for compound 6l

Klamehr 41 13C CDC13

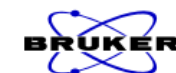

Current Data Parameters  
NAME 110328.207 mk 41 C  
EXPNO 10  
PROCNO 1

F2 - Acquisition Parameters  
Date\_ 20110328  
Time 16.42  
INSTRUM spect  
PROBHD 5 mm PABBO BB-  
PULPROG zgpg30  
TD 65536  
SOLVENT CDC13  
NS 1024  
DS 4  
SWH 15000.000 Hz  
FIDRES 0.228882 Hz  
AQ 2.1845834 sec  
RG 2050  
DW 33.333 usec  
DE 10.00 usec  
TE 298.5 K  
D1 2.00000000 sec  
d11 0.03000000 sec  
DELTA 1.89999998 sec  
TD0 1

===== CHANNEL f1 =====  
NUC1 13C  
P1 10.00 usec  
PL1 -1.00 dB  
SFO1 62.9015280 MHz

===== CHANNEL f2 =====  
CPDPRG2 waltz16  
NUC2 1H  
PCPD2 70.00 usec  
PL12 15.00 dB  
PL13 15.00 dB  
PL2 -2.50 dB  
SFO2 250.1310005 MHz

F2 - Processing parameters  
SI 32768  
SF 62.8952416 MHz  
WDW EM  
SSB 0  
LB 1.00 Hz  
GB 0  
PC 1.40

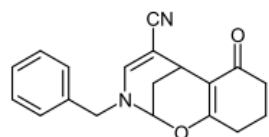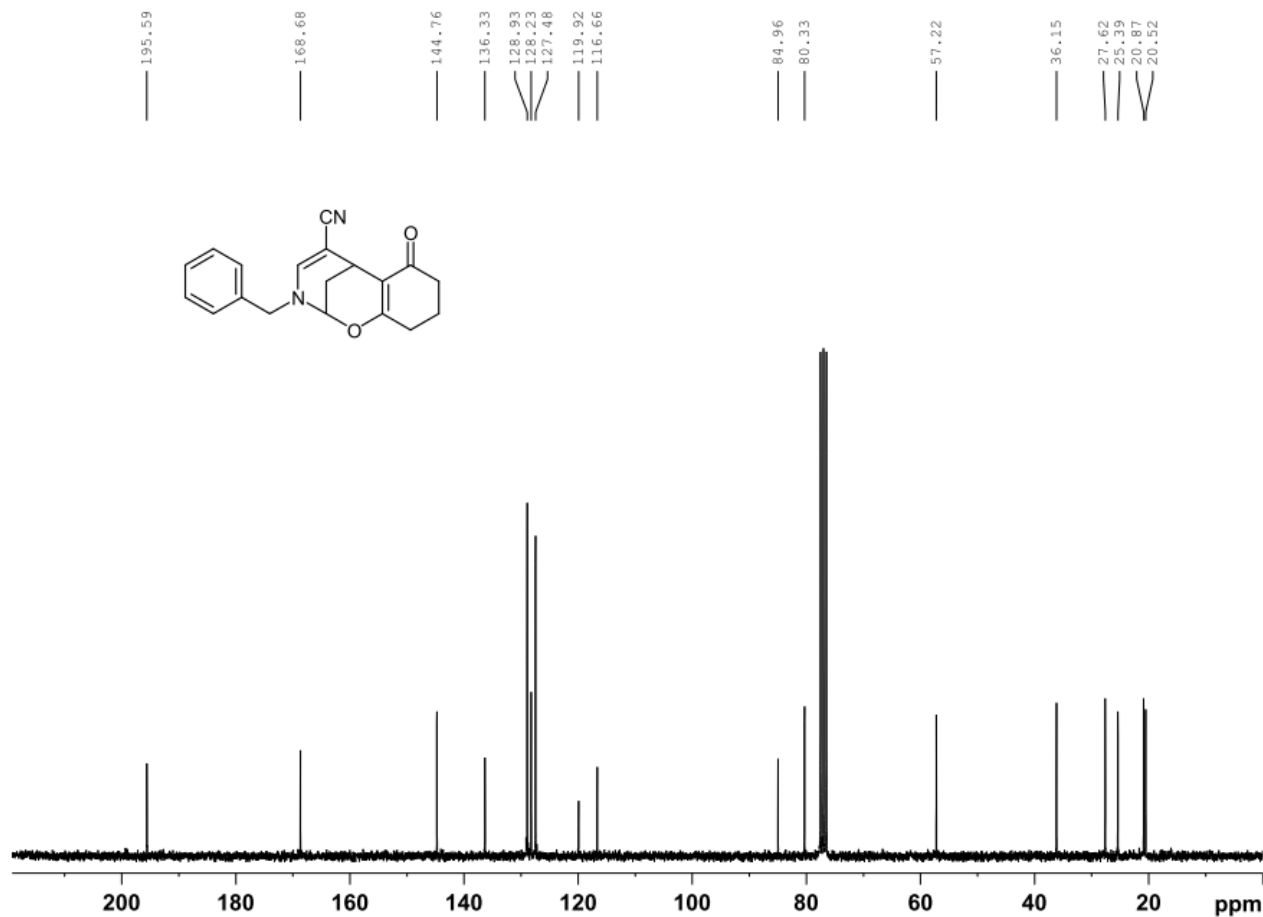

<sup>13</sup>C NMR spectra for compound 6l

Kiamehr 27 1H CDCl3

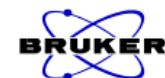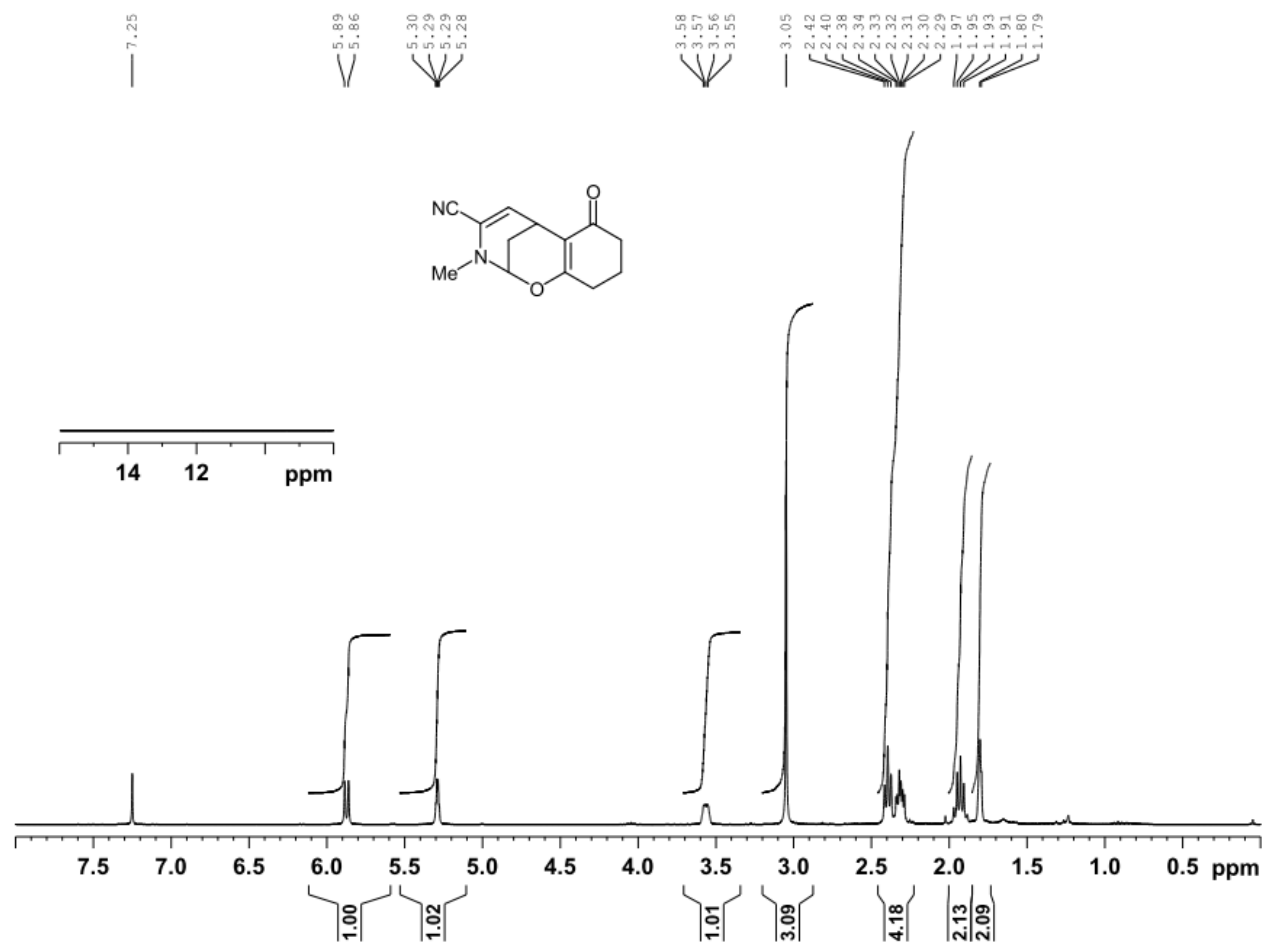

Current Data Parameters  
 NAME 110308.u305 mk 27  
 EXPNO 10  
 PROCNO 1

F2 - Acquisition Parameters  
 Date\_ 20110308  
 Time 8.16  
 INSTRUM spect  
 PROBHD 5 mm PABBO BB-  
 PULPROG zg30  
 TD 65536  
 SOLVENT CDCl3  
 NS 16  
 DS 2  
 SWH 6188.119 Hz  
 FIDRES 0.094423 Hz  
 AQ 5.2953587 sec  
 RG 144  
 DW 80.800 usec  
 DE 10.00 usec  
 TE 298.2 K  
 D1 1.00000000 sec  
 TD0 1

===== CHANNEL f1 =====  
 NUC1 1H  
 P1 10.00 usec  
 PL1 0.00 dB  
 PL1W 11.25325108 W  
 SFO1 300.1318534 MHz

F2 - Processing parameters  
 SI 32768  
 SF 300.1300115 MHz  
 WDW EM  
 SSB 0  
 LB 0.30 Hz  
 GB 0  
 PC 1.00

<sup>1</sup>H NMR spectra for compound 7a

Kiamehr 27 13C CDCl3

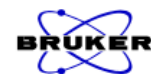

Current Data Parameters  
 NAME 110310.202 mk 27 C  
 EXPNO 10  
 PROCNO 1

F2 - Acquisition Parameters  
 Date\_ 20110310  
 Time 14.26  
 INSTRUM spect  
 PROBHD 5 mm PABBO BB-  
 PULPROG zgpg30  
 TD 65536  
 SOLVENT CDCl3  
 NS 1024  
 DS 4  
 SWH 15000.000 Hz  
 FIDRES 0.228882 Hz  
 AQ 2.1845834 sec  
 RG 1620  
 DW 33.333 usec  
 DE 10.00 usec  
 TE 297.9 K  
 D1 2.00000000 sec  
 d11 0.03000000 sec  
 DELTA 1.89999998 sec  
 TD0 1

===== CHANNEL f1 =====  
 NUC1 13C  
 P1 10.00 usec  
 PL1 -1.00 dB  
 SFO1 62.9015280 MHz

===== CHANNEL f2 =====  
 CPDPRG2 waltz16  
 NUC2 1H  
 PCPD2 70.00 usec  
 PL12 15.00 dB  
 PL13 15.00 dB  
 PL2 -2.50 dB  
 SFO2 250.1310005 MHz

F2 - Processing parameters  
 SI 32768  
 SF 62.8952397 MHz  
 WDW EM  
 SSB 0  
 LB 1.00 Hz  
 GB 0  
 PC 1.40

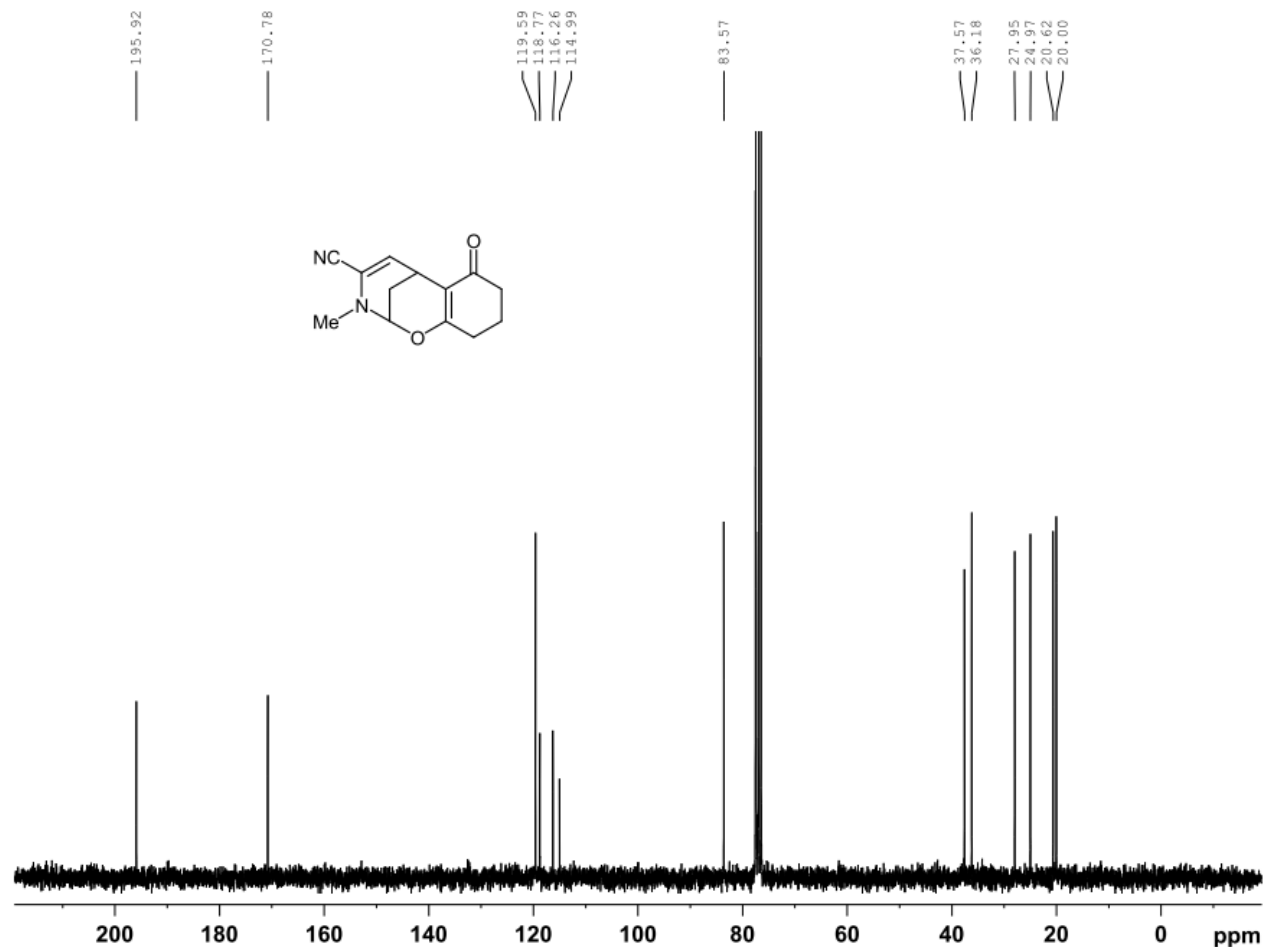

<sup>13</sup>C NMR spectra for compound 7a

Kiamehr KM-54 1H CDCl3

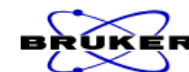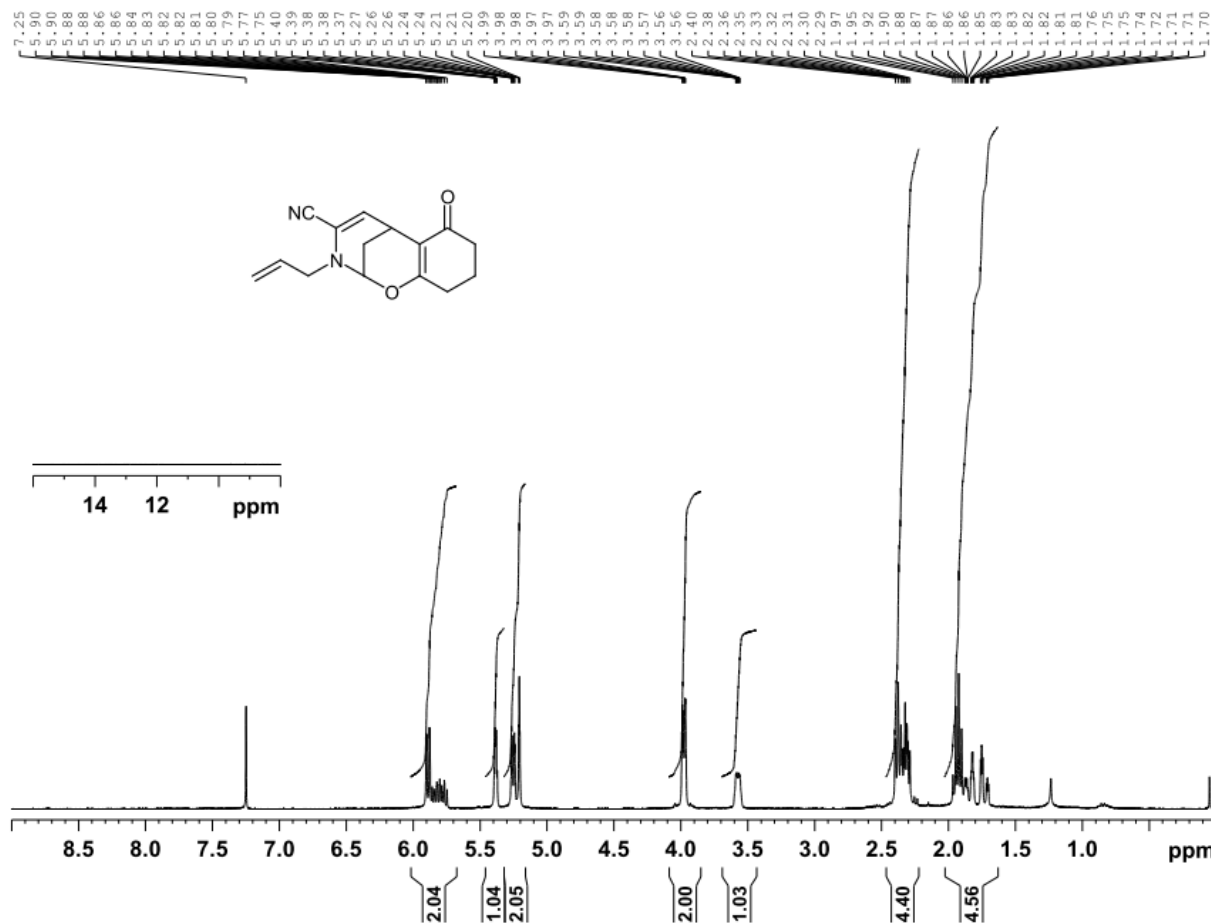

Current Data Parameters  
 NAME 110412.u305 mk 54  
 EXPNO 10  
 PROCNO 1

F2 - Acquisition Parameters  
 Date\_ 20110412  
 Time 8.59  
 INSTRUM spect  
 PROBHD 5 mm PABBO BB-  
 PULPROG zg30  
 TD 65536  
 SOLVENT CDCl3  
 NS 16  
 DS 2  
 SWH 6188.119 Hz  
 FIDRES 0.094423 Hz  
 AQ 5.2953587 sec  
 RG 144  
 DW 80.800 usec  
 DE 10.00 usec  
 TE 298.2 K  
 D1 1.00000000 sec  
 TD0 1

===== CHANNEL f1 =====  
 NUC1 1H  
 P1 10.00 usec  
 PL1 0.00 dB  
 PL1W 11.25325108 W  
 SFO1 300.1318534 MHz

F2 - Processing parameters  
 SI 32768  
 SF 300.1300116 MHz  
 WDW EM  
 SSB 0  
 LB 0.30 Hz  
 GB 0  
 PC 1.00

<sup>1</sup>H NMR spectra for compound 7b

Kiamehr KM-54 13C CDCl3

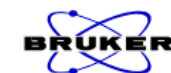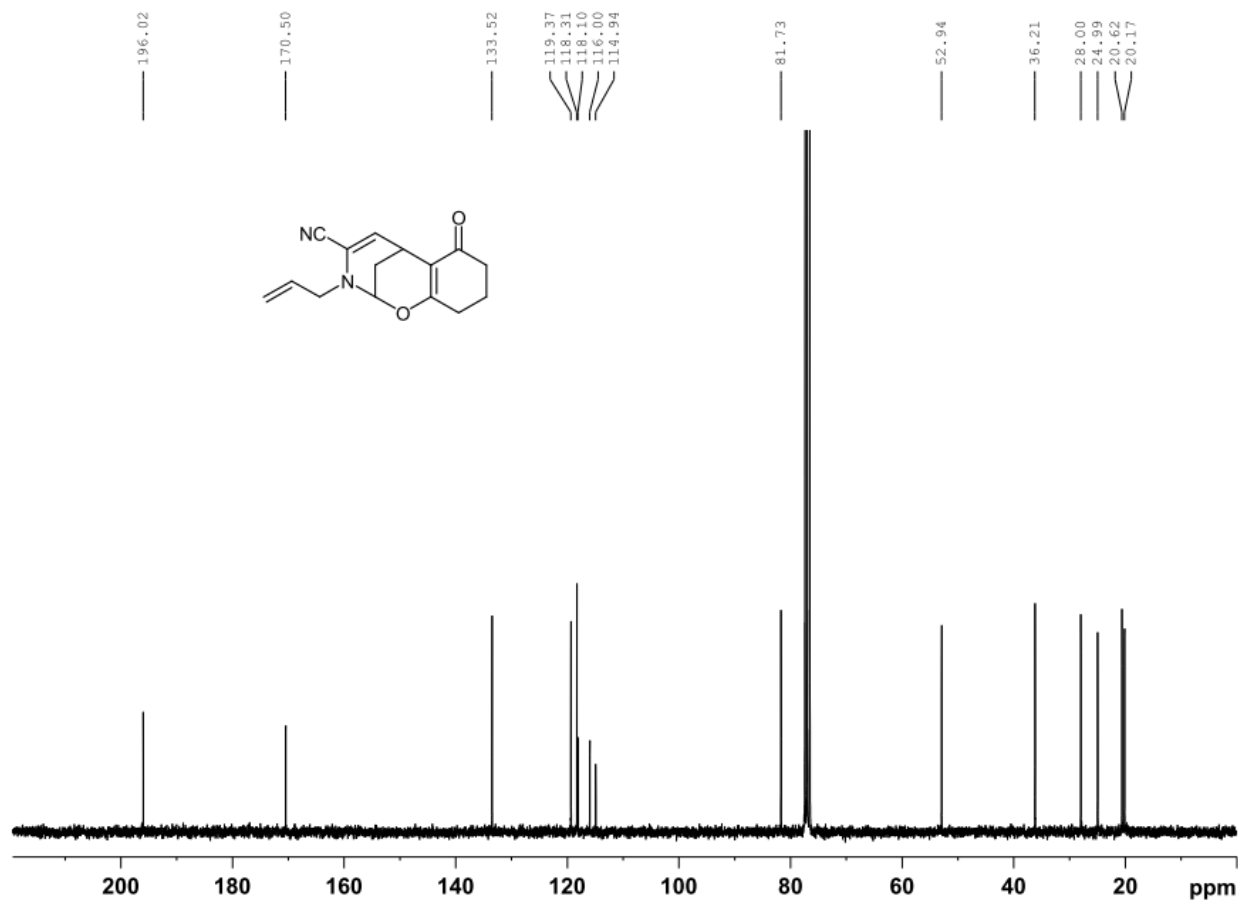

Current Data Parameters  
 NAME 110412.u305 mk 54  
 EXPNO 11  
 PROCNO 1

F2 - Acquisition Parameters  
 Date\_ 20110412  
 Time 21.06  
 INSTRUM spect  
 PROBHD 5 mm PABBO BB-  
 PULPROG zgpg30  
 TD 65536  
 SOLVENT CDCl3  
 NS 1024  
 DS 4  
 SWH 18028.846 Hz  
 FIDRES 0.275098 Hz  
 AQ 1.8175818 sec  
 RG 2050  
 DW 27.733 usec  
 DE 10.00 usec  
 TE 298.4 K  
 D1 2.00000000 sec  
 D11 0.03000000 sec  
 TD0 1

===== CHANNEL f1 =====  
 NUC1 13C  
 P1 10.00 usec  
 PL1 -0.50 dB  
 PL1W 33.25691986 W  
 SFO1 75.4752953 MHz

===== CHANNEL f2 =====  
 CPDPRG2 waltz16  
 NUC2 1H  
 PCPD2 72.00 usec  
 PL2 0.00 dB  
 PL12 17.00 dB  
 PL13 17.00 dB  
 PL2W 11.25325108 W  
 PL12W 0.22453187 W  
 PL13W 0.22453187 W  
 SFO2 300.1312005 MHz

F2 - Processing parameters  
 SI 32768  
 SF 75.4677514 MHz  
 WDW EM  
 SSB 0  
 LB 1.00 Hz  
 GB 0  
 PC 1.40

<sup>13</sup>C NMR spectra for compound 7b

Kiamehr KM-53 1H CDCl3

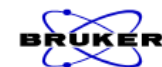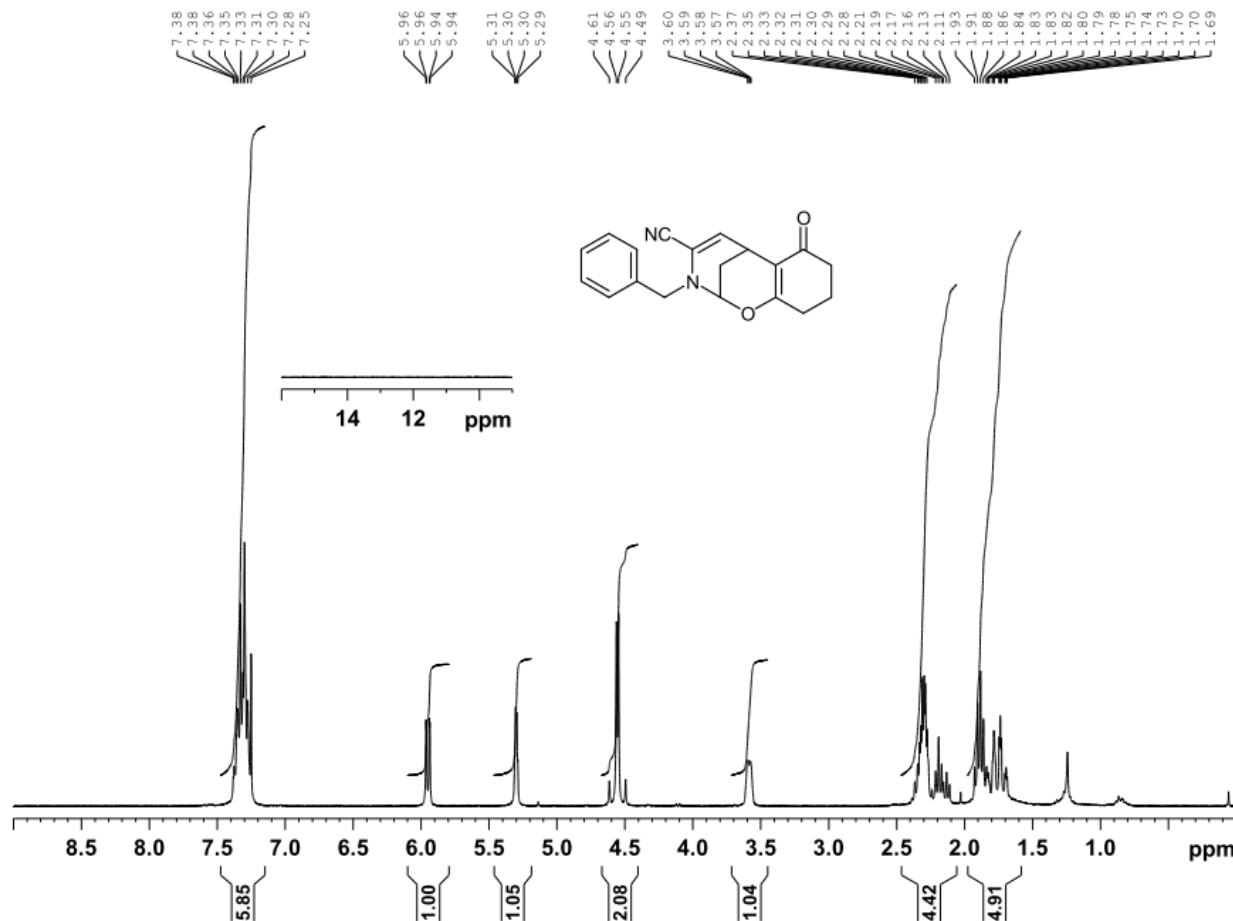

Current Data Parameters  
NAME 110412.u304 mk 53  
EXPNO 10  
PROCNO 1

F2 - Acquisition Parameters  
Date\_ 20110412  
Time 8.53  
INSTRUM spect  
PROBHD 5 mm PABBO BB-  
PULPROG zg30  
TD 65536  
SOLVENT CDCl3  
NS 16  
DS 2  
SWH 6188.119 Hz  
FIDRES 0.094423 Hz  
AQ 5.2953587 sec  
RG 144  
DW 80.800 usec  
DE 10.00 usec  
TE 298.2 K  
D1 1.0000000 sec  
TD0 1

===== CHANNEL f1 =====  
NUC1 1H  
P1 10.00 usec  
PL1 0.00 dB  
PL1W 11.25325108 W  
SFO1 300.1318534 MHz

F2 - Processing parameters  
SI 32768  
SF 300.1300118 MHz  
WDW EM  
SSB 0  
LB 0.30 Hz  
GB 0  
PC 1.00

<sup>1</sup>H NMR spectra for compound 7c



Kiamehr KM-53 13C CDCl3

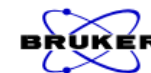

Current Data Parameters  
 NAME 110412.u304 mk 53  
 EXPNO 11  
 PROCNO 1

F2 - Acquisition Parameters  
 Date\_ 20110412  
 Time 19.37  
 INSTRUM spect  
 PROBHD 5 mm PABBO BB-  
 PULPROG zgpg30  
 TD 65536  
 SOLVENT CDCl3  
 NS 1024  
 DS 4  
 SWH 18028.846 Hz  
 FIDRES 0.275098 Hz  
 AQ 1.8175818 sec  
 RG 2050  
 DW 27.733 usec  
 DE 10.00 usec  
 TE 298.6 K  
 D1 2.00000000 sec  
 D11 0.03000000 sec  
 TD0 1

===== CHANNEL f1 =====  
 NUC1 13C  
 P1 10.00 usec  
 PL1 -0.50 dB  
 PL1W 33.25691986 W  
 SFO1 75.4752953 MHz

===== CHANNEL f2 =====  
 CPDPRG2 waltz16  
 NUC2 1H  
 PCPD2 72.00 usec  
 PL2 0.00 dB  
 PL12 17.00 dB  
 PL13 17.00 dB  
 PL2W 11.25325108 W  
 PL12W 0.22453187 W  
 PL13W 0.22453187 W  
 SFO2 300.1312005 MHz

F2 - Processing parameters  
 SI 32768  
 SF 75.4677515 MHz  
 WDW EM  
 SSB 0  
 LB 1.00 Hz  
 GB 0  
 PC 1.40

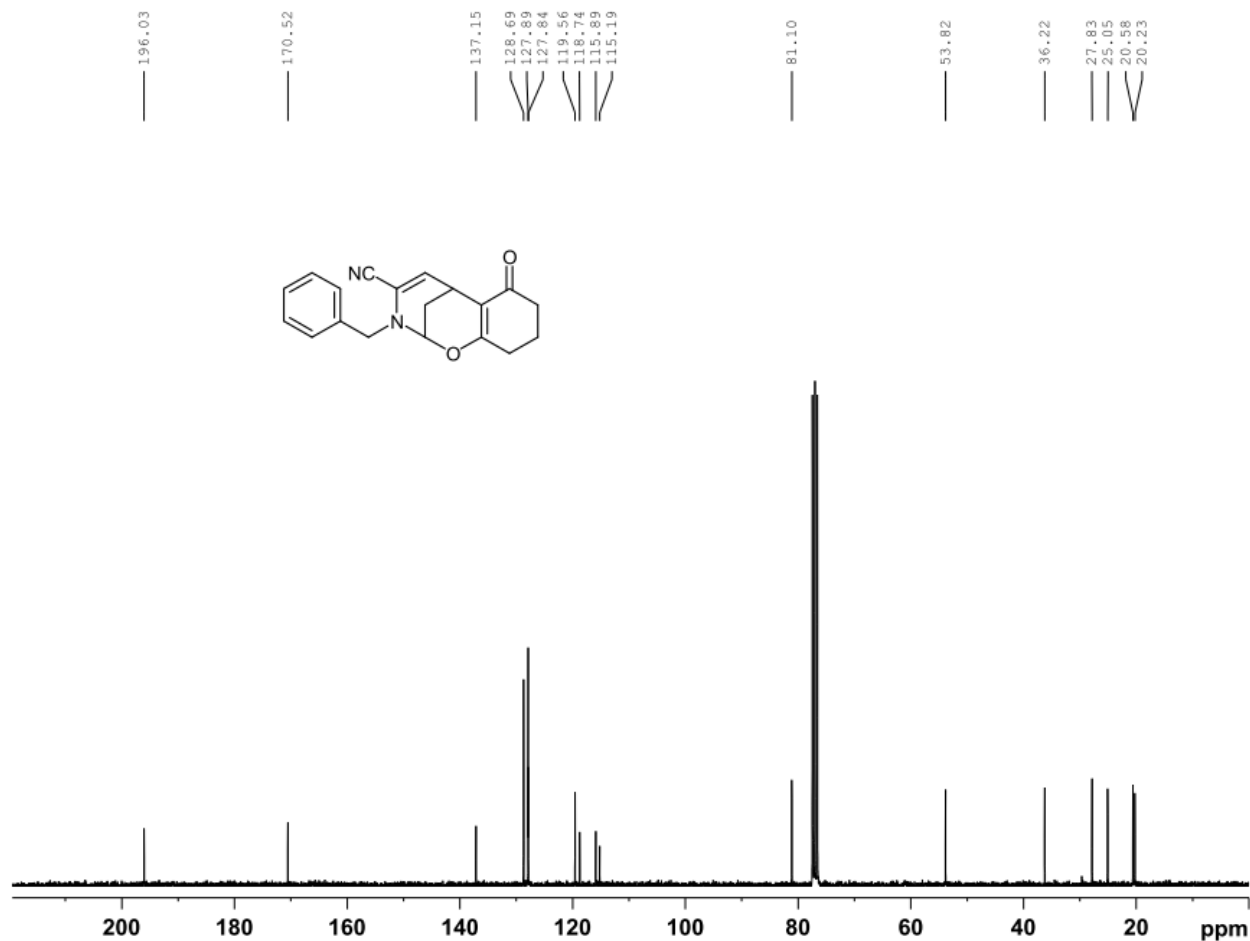

<sup>13</sup>C NMR spectra for compound 7c

Kiamehr 22-1 1H CDCl3

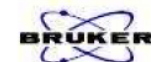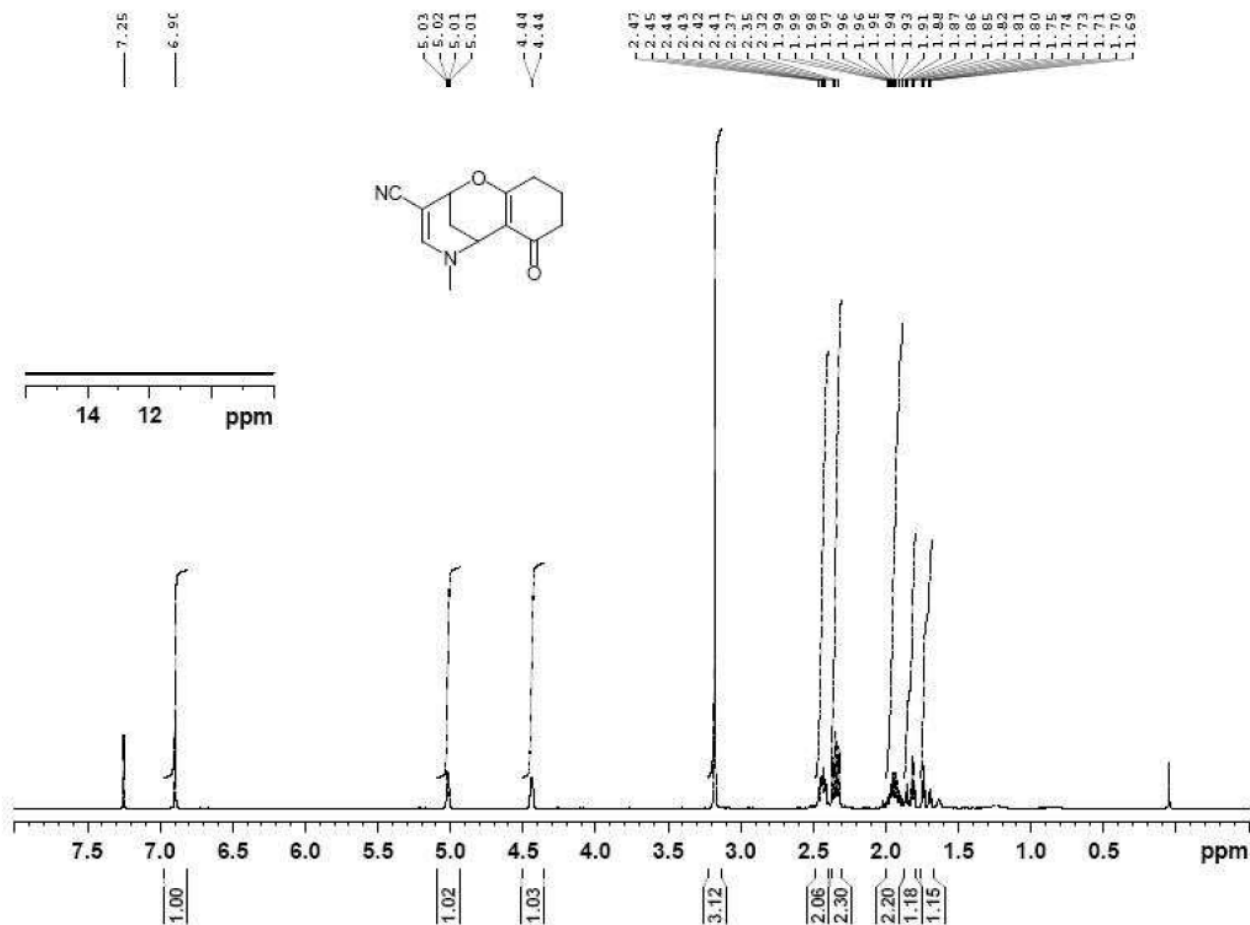

Current Data Parameters  
NAME 110303.u339 mk 22-1  
EXPNO 10  
PROCNO 1

F2 - Acquisition Parameters  
Date\_ 20110303  
Time 14.49  
INSTRUM spect  
PROBHD 5 mm PABBO BB-  
PULPROG zg30  
TD 65536  
SOLVENT CDCl3  
NS 16  
DS 2  
SWH 6188.119 Hz  
FIDRES 0.094423 Hz  
AQ 5.2953587 sec  
RG 144  
DW 30.800 usec  
DE 10.00 usec  
TE 298.2 K  
D1 1.00000000 sec  
TD0 1

===== CHANNEL f1 =====  
NUC1 1H  
P1 10.00 usec  
PL1 0.00 dB  
PL1W 11.25325108 W  
SFO1 300.1318534 MHz

F2 - Processing parameters  
SI 32768  
SF 300.1300109 MHz  
WDW EM  
SSB 0  
LB 0.30 Hz  
GB 0  
PC 1.00

<sup>1</sup>H NMR spectra for compound 8

Kiamehr 22-1 13C CDCl3

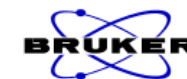

Current Data Parameters  
 NAME 110304.213 mk 22-1 C  
 EXPNO 10  
 PROCNO 1

F2 - Acquisition Parameters  
 Date\_ 20110305  
 Time 12.08  
 INSTRUM spect  
 PROBHD 5 mm PABBO BB-  
 PULPROG zgpg30  
 TD 65536  
 SOLVENT CDCl3  
 NS 1024  
 DS 4  
 SWH 15000.000 Hz  
 FIDRES 0.228882 Hz  
 AQ 2.1845834 sec  
 RG 2050  
 DW 33.333 usec  
 DE 10.00 usec  
 TE 298.0 K  
 D1 2.00000000 sec  
 d11 0.03000000 sec  
 DELTA 1.89999998 sec  
 TD0 1

CHANNEL f1  
 NUC1 13C  
 P1 10.00 usec  
 PL1 -1.00 dB  
 SFO1 62.9015280 MHz

CHANNEL f2  
 CPDPRG2 waltz16  
 NUC2 1H  
 PCPD2 70.00 usec  
 PL12 15.00 dB  
 PL13 15.00 dB  
 PL2 -2.50 dB  
 SFO2 250.1310005 MHz

F2 - Processing parameters  
 SI 32768  
 SF 62.8952393 MHz  
 WDW EM  
 SSB 0  
 LB 1.00 Hz  
 GB 0  
 PC 1.40

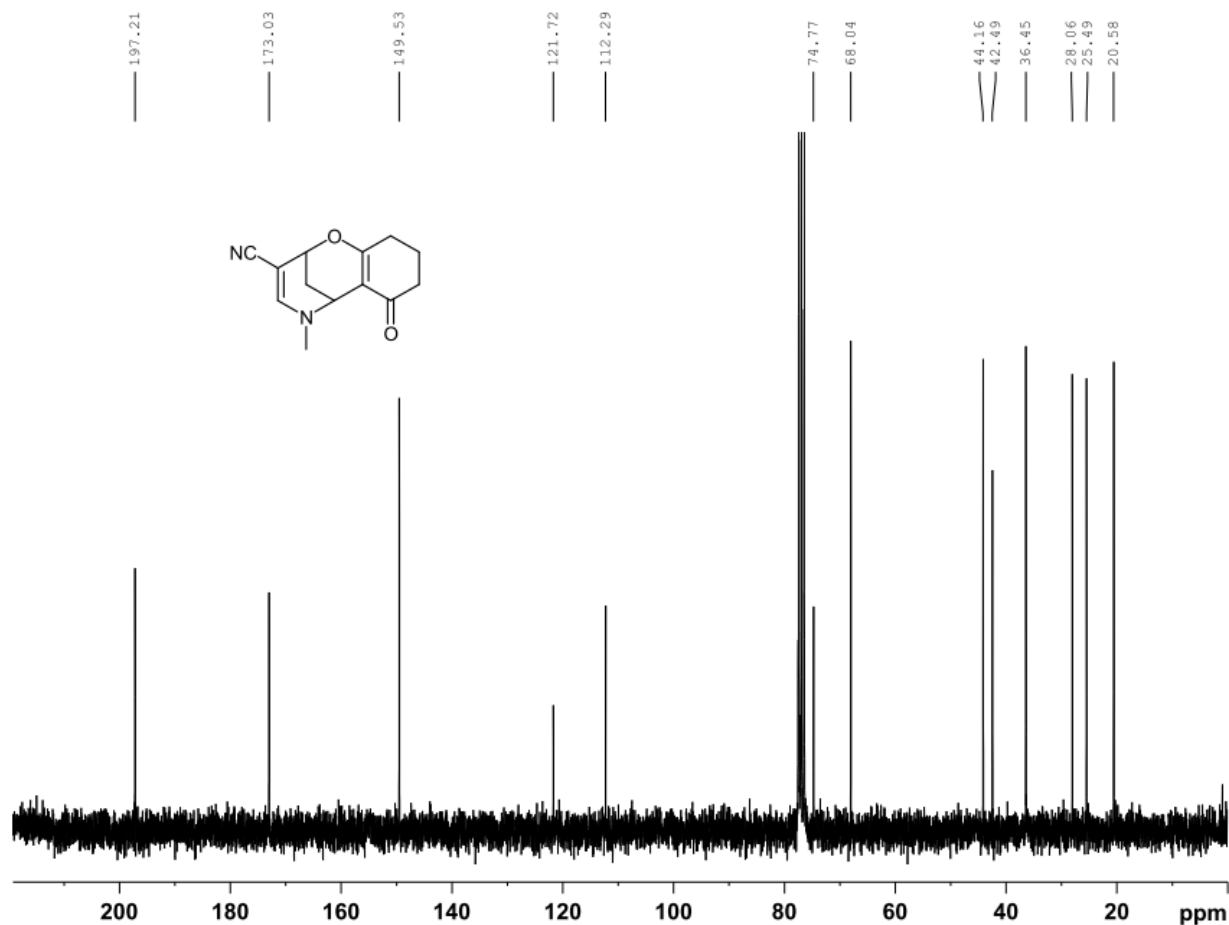

<sup>13</sup>C NMR spectra for compound 8

X-ray structures of compounds 6d, 7c, 8

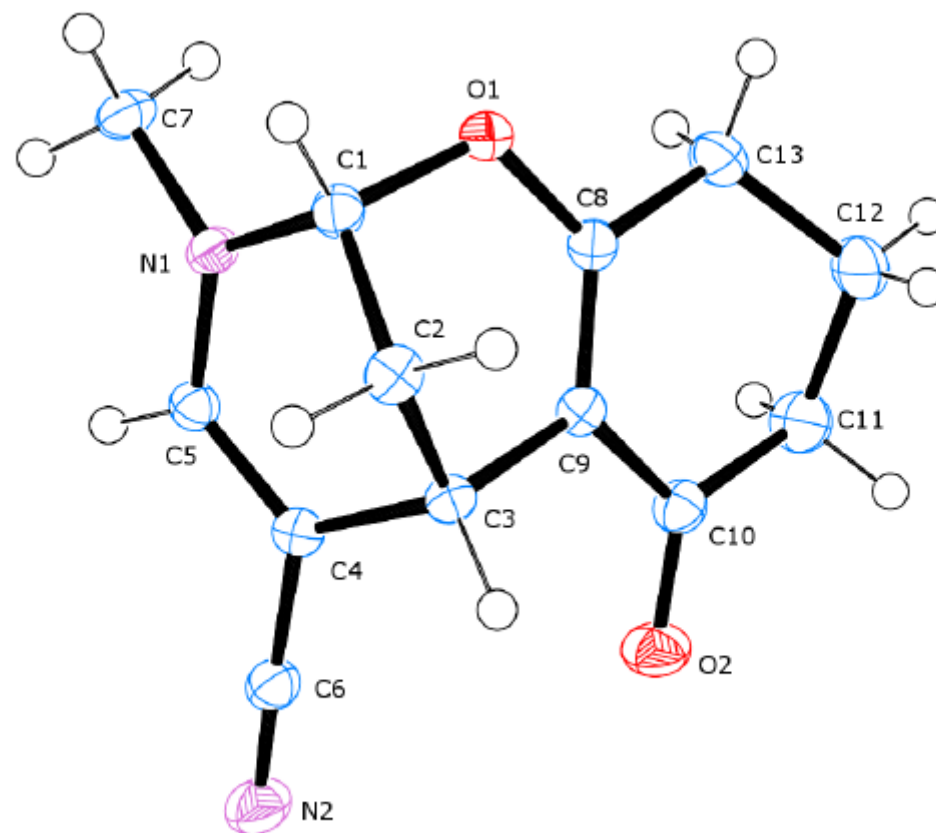

Figure S2: ORTEP plot of structure 6d.

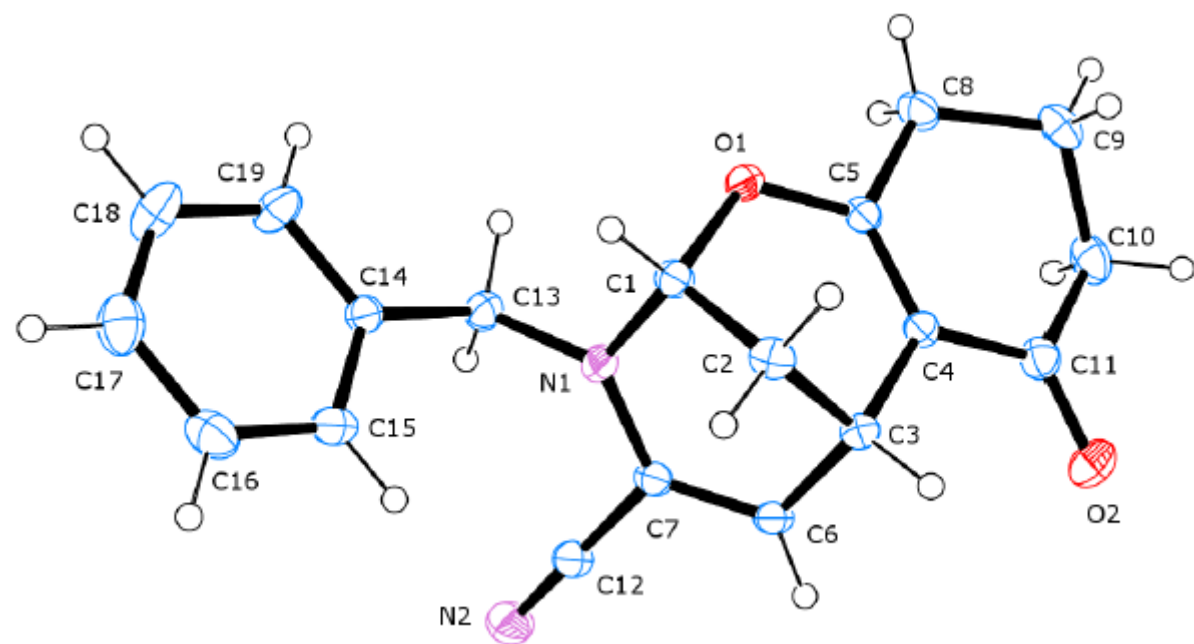

**Figure S3:** ORTEP plot of structure **7c**.

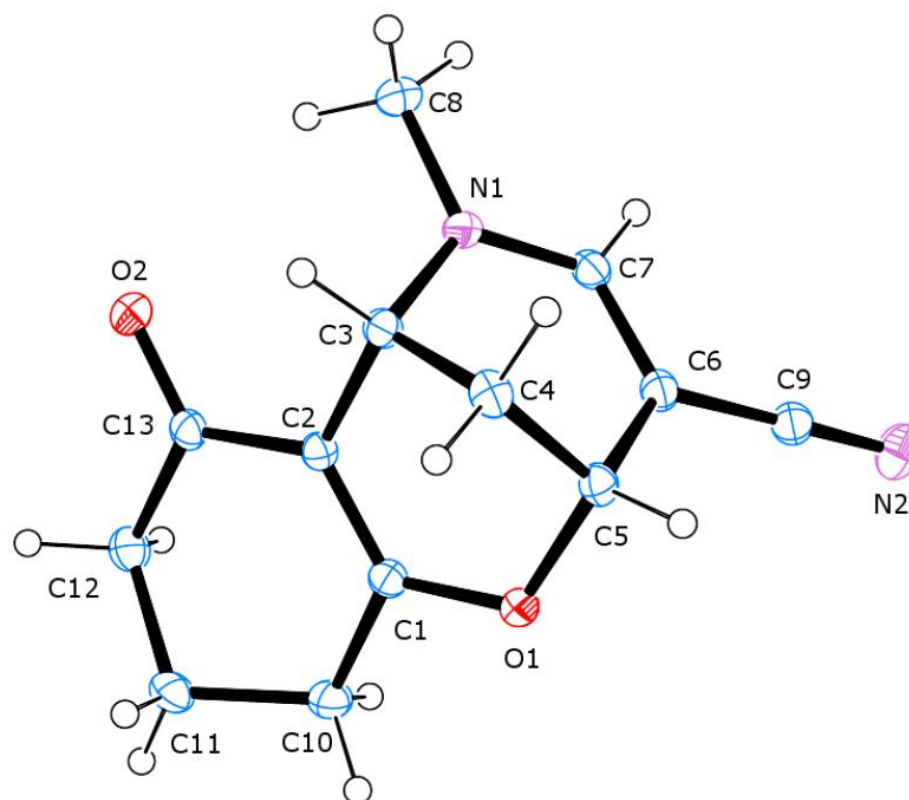

**Figure S4:** ORTEP plot of structure **8**.
